# Supplementary material for: Recommendations on benchmarks for numerical air quality model applications in China – Part 1: PM 2.5 and chemical species
Source: Copernicus journal article supplement (doi:10.5194/acp-21-2725-2021), 2021-02-24
Supplement: Supplementary file 1 [file acp-21-2725-2021-supplement.pdf]

Supplement of Atmos. Chem. Phys., 21, 2725–2743, 2021  
<https://doi.org/10.5194/acp-21-2725-2021-supplement>  
© Author(s) 2021. This work is distributed under  
the Creative Commons Attribution 4.0 License.

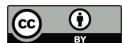

*Supplement of*

## **Recommendations on benchmarks for numerical air quality model applications in China – Part 1: PM<sub>2.5</sub> and chemical species**

**Ling Huang et al.**

*Correspondence to:* Li Li (lily@shu.edu.cn)

The copyright of individual parts of the supplement might differ from the CC BY 4.0 License.

## Content

**Table S1** List of peer-reviewed journals included in this study

**Table S2** Summary of studies complied in this work

**Table S3** Definition of regions

**Table S4** List of statistical metrics used in studies complied in this work

**Table S5** Full name of species listed in Figure 3

**Table S6** Quantile values of selected statistical metrics for total  $PM_{2.5}$  and speciated components

**Table S7** List of model configurations collected from published studies

**Figure S1** Quantile distributions of MB, RMSE, NMB, NME, FB, FE, R and IOA of (a) sulfate, (b) nitrate, and (c) ammonium presented by temporal resolution for model validation

**Figure S2** Quantile distributions of MB, RMSE, NMB, NME, FB, FE, R and IOA of (a) sulfate, (b) nitrate, and (c) ammonium presented by model grid resolution

**Figure S3** Quantile distribution of R and NMB of sulfate, nitrate and ammonium presented by data published year

## References

**Table S1: List of peer-reviewed journals included in this study**

| <b>No.</b> | <b>Journal name</b>                         | <b>No. of journal articles included in this study</b> |
|------------|---------------------------------------------|-------------------------------------------------------|
| 1          | Advances in Atmospheric Sciences            | 6                                                     |
| 2          | Aerosol and Air Quality Research            | 17                                                    |
| 3          | Asian Journal of Atmospheric Environment    | 1                                                     |
| 4          | Atmosphere                                  | 2                                                     |
| 5          | Atmospheric Chemistry and Physics           | 92                                                    |
| 6          | Atmospheric Environment                     | 100                                                   |
| 7          | Atmospheric Research                        | 10                                                    |
| 8          | Environmental Pollution                     | 18                                                    |
| 9          | Environmental Science & Technology          | 7                                                     |
| 10         | Journal of Environmental Sciences           | 8                                                     |
| 11         | Journal of Geophysical Research-Atmospheres | 13                                                    |
| 12         | Science of the Total Environment            | 33                                                    |

**Table S2: Summary of studies complied in this work (see Figure 1 for region definition)**

| Reference                     | Models applied | Pollutants evaluated                                                                                                                                    | Seasons evaluated              | Regions evaluated                                                 |
|-------------------------------|----------------|---------------------------------------------------------------------------------------------------------------------------------------------------------|--------------------------------|-------------------------------------------------------------------|
| An et al. (2007)              | CMAQ           | PM <sub>10</sub> , SO <sub>2</sub>                                                                                                                      | Spring                         | BTH                                                               |
| J. An et al. (2013)           | WRF-Chem       | HONO                                                                                                                                                    | Summer                         | BTH                                                               |
| X. An et al. (2013)           | CMAQ           | SO <sub>2</sub> , NO <sub>x</sub> , CO, O <sub>3</sub>                                                                                                  | Annual                         | BTH, Northeast, YRD                                               |
| Ansari et al. (2019)          | WRF-Chem       | PM <sub>2.5</sub> , PM <sub>10</sub> , CO, NO <sub>2</sub> , SO <sub>2</sub> , O <sub>3</sub>                                                           | Fall                           | BTH, NCP                                                          |
| Archer-Nicholls et al. (2016) | WRF-Chem       | PM <sub>2.5</sub>                                                                                                                                       | Annual                         | Entire China                                                      |
| Bei et al. (2016)             | WRF-Chem       | PM <sub>2.5</sub> , O <sub>3</sub> , NO <sub>2</sub> , SO <sub>2</sub> , CO                                                                             | Winter                         | PRD                                                               |
| Bei et al. (2018)             | WRF-Chem       | PM <sub>2.5</sub> , O <sub>3</sub> , NO <sub>2</sub> , CO                                                                                               | Summer                         | BTH                                                               |
| Bo et al. (2019)              | CAMx           | NO <sub>x</sub> , SO <sub>2</sub> , PM <sub>2.5</sub> , nitrate, sulfate                                                                                | Annual                         | China                                                             |
| Bouarar et al. (2019)         | WRF-Chem       | NO <sub>x</sub> , O <sub>3</sub> , SO <sub>2</sub> , PM <sub>2.5</sub> , PM <sub>10</sub> , NO <sub>2</sub>                                             | Summer, winter                 | Beijing (NCP), Guangzhou (PRD), Shanghai (YRD)                    |
| Campbell et al. (2017)        | WRF-Chem       | PM <sub>10</sub> , PM <sub>2.5</sub> , CO, NO, NO <sub>2</sub> , NO <sub>x</sub> , O <sub>3</sub> , SO <sub>2</sub>                                     | Spring                         | Southeast, Entire china, PRD                                      |
| Chang et al. (2018)           | CMAQ           | PM <sub>2.5</sub> , EC, OC, nitrate, sulfate, ammonium                                                                                                  | Summer, winter                 | BTH                                                               |
| Che et al. (2011)             | CMAQ           | SO <sub>2</sub> , NO <sub>2</sub> , PM <sub>10</sub> , O <sub>3</sub>                                                                                   | Fall                           | PRD                                                               |
| Chen et al. (2007)            | CMAQ           | PM <sub>10</sub>                                                                                                                                        | Spring, summer, fall, winter   | BTH                                                               |
| Chen et al. (2014)            | CMAQ           | PM <sub>10</sub>                                                                                                                                        | Annual, spring, summer, winter | BTH                                                               |
| Chen et al. (2015)            | WRF-Chem       | PM <sub>10</sub>                                                                                                                                        | Spring, summer, fall, winter   | BTH, YRD, Central China, PRD                                      |
| Chen et al. (2016)            | WRF-Chem       | PM <sub>2.5</sub> , PM <sub>10</sub> , NO <sub>2</sub> , O <sub>3</sub> , SO <sub>2</sub> , CO, BC, SO <sub>4</sub> , NO <sub>3</sub> , NH <sub>4</sub> | Fall                           | BTH                                                               |
| D. Chen et al. (2017a)        | CMAQ           | PM <sub>2.5</sub> , OC/EC, sulfate, nitrate, ammonium                                                                                                   | Fall                           | NCP                                                               |
| D. Chen et al. (2017b)        | WRF-Chem       | PM <sub>2.5</sub>                                                                                                                                       | Spring, summer, fall, winter   | NCP                                                               |
| L. Chen et al. (2017a)        | WRF-Chem       | SO <sub>2</sub> , NO <sub>2</sub> , PM <sub>2.5</sub> , PM <sub>10</sub>                                                                                | Spring                         | Northwest, BTH                                                    |
| L. Chen et al. (2017b)        | CMAQ           | PM <sub>10</sub>                                                                                                                                        | Winter, summer, spring, fall   | NCP                                                               |
| Chen et al. (2018)            | WRF-Chem       | PM <sub>2.5</sub>                                                                                                                                       | Spring, summer, fall, winter   | BTH                                                               |
| D. Chen et al. (2019a)        | WRF-Chem       | SO <sub>2</sub>                                                                                                                                         | Annual                         | NCP, Northeast, Northwest, Sichuan Basin, Central China, YRD, PRD |
| D. Chen et al. (2019b)        | CMAQ           | PM <sub>2.5</sub>                                                                                                                                       | Spring, summer, fall, winter   | YRD                                                               |
| D. Chen et al. (2019c)        | WRF-Chem       | NO <sub>2</sub> , SO <sub>2</sub> , PM <sub>2.5</sub>                                                                                                   | Spring, summer, fall, winter   | PRD                                                               |
| L. Chen et al. (2019a)        | CMAQ           | PM <sub>2.5</sub> , EC, nitrate, ammonium, PM <sub>10</sub> , sulfate, AOD, NO <sub>2</sub> , SO <sub>2</sub>                                           | Annual                         | Entire China                                                      |
| L. Chen et al. (2019b)        | WRF-Chem       | PM <sub>2.5</sub>                                                                                                                                       | Fall                           | Northeast, BTH, Central china                                     |
| T. Chen et al. (2019)         | CMAQ           | PM <sub>2.5</sub> , SO <sub>2</sub> , NO <sub>2</sub>                                                                                                   | Winter                         | Southeast                                                         |
| X. Chen et al. (2019)         | WRF-Chem       | NO <sub>2</sub> , O <sub>3</sub>                                                                                                                        | Fall                           | PRD                                                               |
| Cheng et al. (2013)           | CAMx           | PM <sub>10</sub>                                                                                                                                        | Fall                           | PRD                                                               |
| Cheng et al. (2014)           | CMAQ           | PM <sub>2.5</sub>                                                                                                                                       | Summer                         | YRD                                                               |
| Cheng et al. (2017)           | CMAQ           | PM <sub>10</sub> , PM <sub>2.5</sub>                                                                                                                    | Winter                         | Entire China                                                      |
| Cheng et al. (2019)           | CMAQ           | PM <sub>2.5</sub> , SO <sub>2</sub> , NO <sub>2</sub> , CO, PM <sub>10</sub> , O <sub>3</sub>                                                           | Annual, spring, summer, fall,  | BTH                                                               |

|                        |           |                                                                                           |                                                             |                                                                                  |
|------------------------|-----------|-------------------------------------------------------------------------------------------|-------------------------------------------------------------|----------------------------------------------------------------------------------|
| Cui et al. (2015)      | WRF-Chem  | SO <sub>2</sub> , NO <sub>2</sub> , PM <sub>2.5</sub> , O <sub>3</sub>                    | winter<br>Spring + fall + winter, spring<br>+ summer + fall | PRD                                                                              |
| Ding et al. (2019)     | WRF-Chem  | PM <sub>2.5</sub>                                                                         | Winter                                                      | Entire China                                                                     |
| Dong et al. (2013)     | CMAQ      | O <sub>3</sub> , SO <sub>2</sub> , NO <sub>2</sub> , PM <sub>2.5</sub> , PM <sub>10</sub> | Annual                                                      | YRD                                                                              |
| Dong et al. (2014)     | CMAQ      | PM <sub>2.5</sub> , sulfate, ammonium, nitrate                                            | Annual                                                      | YRD                                                                              |
| Du et al. (2019)       | NAQPMS    | PM <sub>2.5</sub>                                                                         | Fall, winter                                                | BTH                                                                              |
| Fan et al. (2015)      | CMAQ      | PM <sub>2.5</sub> , SO <sub>2</sub> , NO <sub>2</sub> , O <sub>3</sub>                    | Spring                                                      | PRD                                                                              |
| T. Feng et al. (2016a) | WRF-Chem  | O <sub>3</sub> , NO <sub>2</sub> , PM <sub>2.5</sub>                                      | Summer                                                      | Northwest                                                                        |
| T. Feng et al. (2016b) | WRF-Chem  | PM <sub>2.5</sub> , O <sub>3</sub> , EC                                                   | Spring                                                      | Northwest                                                                        |
| S. Feng et al. (2018)  | CMAQ      | PM <sub>2.5</sub>                                                                         | Winter                                                      | Entire China, NCP, YRD, Sichuan Basin                                            |
| T. Feng et al. (2018a) | WRF-Chem  | O <sub>3</sub> , NO <sub>2</sub> , PM <sub>2.5</sub> , sulfate, nitrate, ammonium, HONO   | Winter                                                      | Northwest                                                                        |
| T. Feng et al. (2018b) | WRF-Chem  | CO <sub>2</sub>                                                                           | Summer                                                      | Northwest                                                                        |
| J. Feng et al. (2019)  | CMAQ      | SO <sub>2</sub> , PM <sub>2.5</sub>                                                       | Summer, winter                                              | YRD                                                                              |
| T. Feng et al. (2019)  | WRF-Chem  | PM <sub>2.5</sub> , OM, O <sub>3</sub> , NO <sub>2</sub> , EC                             | Fall                                                        | BTH                                                                              |
| X. Feng et al. (2019)  | WRF-Chem  | PM <sub>2.5</sub>                                                                         | Winter                                                      | PRD                                                                              |
| Fu et al. (2008)       | CMAQ      | SO <sub>2</sub> , NO <sub>2</sub> , O <sub>3</sub>                                        | Summer                                                      | Entire China, PRD + Southeast                                                    |
| Fu et al. (2014)       | CMAQ      | PM <sub>10</sub>                                                                          | Spring                                                      | Entire China, BTH, YRD, PRD, NCP, Northwest, Southwest, Central China, Southeast |
| Fu et al. (2015)       | CMAQ      | nitrate                                                                                   | Fall, summer                                                | YRD                                                                              |
| X. Fu et al. (2016)    | CMAQ      | PM <sub>2.5</sub>                                                                         | Winter                                                      | YRD                                                                              |
| Y. Fu et al. (2016)    | GEOS-Chem | OM, OC                                                                                    | Summer + fall, winter,<br>spring, summer, fall              | Entire China                                                                     |
| Fu et al. (2019)       | CMAQ      | O <sub>3</sub> (8-hr max), PM <sub>2.5</sub>                                              | Fall                                                        | PRD                                                                              |
| Gao et al. (2011)      | WRF-Chem  | PM <sub>2.5</sub>                                                                         | Summer                                                      | BTH                                                                              |
| Gao et al. (2012)      | CMAQ      | O <sub>3</sub> , NO <sub>x</sub>                                                          | Summer                                                      | BTH                                                                              |
| Gao et al. (2014)      | CMAQ      | PM <sub>2.5</sub>                                                                         | Winter                                                      | YRD                                                                              |
| J. Gao et al. (2016)   | WRF-Chem  | O <sub>3</sub>                                                                            | Spring                                                      | YRD                                                                              |
| M. Gao et al. (2016a)  | WRF-Chem  | PM <sub>2.5</sub>                                                                         | Winter                                                      | BTH                                                                              |
| M. Gao et al. (2016b)  | WRF-Chem  | PM <sub>2.5</sub>                                                                         | Winter                                                      | BTH                                                                              |
| J. Gao et al. (2017)   | WRF-Chem  | O <sub>3</sub>                                                                            | Summer                                                      | YRD                                                                              |
| M. Gao et al. (2017a)  | WRF-Chem  | PM <sub>2.5</sub>                                                                         | Fall                                                        | BTH                                                                              |
| M. Gao et al. (2017b)  | WRF-Chem  | PM <sub>2.5</sub> , PM <sub>10</sub>                                                      | Winter                                                      | BTH                                                                              |
| Gao et al. (2018)      | WRF-Chem  | PM <sub>2.5</sub>                                                                         | Annual                                                      | Entire China                                                                     |
| Gbaguidi et al. (2018) | NAQPMS    | SO <sub>2</sub> , NO <sub>2</sub> , sulfate, nitrate, ammonium, Ca                        | Summer                                                      | Northeast                                                                        |
| Ge et al. (2014)       | NAQPMS    | SO <sub>2</sub> , NO <sub>x</sub> , ammonia, sulfate, nitrate, ammonium                   | Spring, summer, fall, winter                                | PRD                                                                              |

|                            |           |                                                                                                                                    |                                      |                                                                                                                    |
|----------------------------|-----------|------------------------------------------------------------------------------------------------------------------------------------|--------------------------------------|--------------------------------------------------------------------------------------------------------------------|
| Guo et al. (2016)          | WRF-Chem  | SO <sub>2</sub> , NO <sub>2</sub> , O <sub>3</sub> , CO, PM <sub>2.5</sub> , PM <sub>10</sub>                                      | Fall                                 | BTH                                                                                                                |
| Han et al. (2009)          | CMAQ      | NO <sub>2</sub> column                                                                                                             | Spring, summer, fall, winter         | BTH+YRD                                                                                                            |
| Han et al. (2011)          | CMAQ      | AOD, sulfate, PM <sub>2.5</sub> , PM <sub>10</sub>                                                                                 | Annual                               | BTH                                                                                                                |
| Han et al. (2012)          | CMAQ      | PM <sub>10</sub>                                                                                                                   | Spring                               | NCP, Central China, BTH, Northwest, Southeast, YRD, PRD                                                            |
| X. Han et al. (2013)       | CMAQ      | SO <sub>2</sub> , NO <sub>2</sub> , PM <sub>2.5</sub> , PM <sub>10</sub> , O <sub>3</sub>                                          | Winter                               | BTH, NCP                                                                                                           |
| K. Han et al. (2013)       | CMAQ      | HCHO column                                                                                                                        | Summer, winter                       | YRD+Central China, Northeast+Southeast, PRD+Southwest+Southeast                                                    |
| Han et al. (2014)          | CMAQ      | PM <sub>2.5</sub> , O <sub>3</sub> , NO <sub>2</sub>                                                                               | Summer, winter                       | BTH                                                                                                                |
| Han et al. (2015)          | CMAQ      | NO <sub>2</sub>                                                                                                                    | Spring, summer, fall, winter         | BTH+NCP+Central China, YRD+Central China, PRD+Southwest+Central China+Southeast, Sichuan Basin+Northwest+Southwest |
| Han et al. (2018)          | CMAQ      | O <sub>3</sub> , NO <sub>2</sub>                                                                                                   | Summer, winter                       | BTH                                                                                                                |
| Hu et al. (2015)           | CMAQ      | PM <sub>2.5</sub>                                                                                                                  | Spring                               | BTH, Northeast, Central China, Sichuan Basin, Southwest, PRD, YRD, NCP, Northwest                                  |
| Hu et al. (2016)           | CMAQ      | O <sub>3</sub> (1-hr max), O <sub>3</sub> (8-hr max), PM <sub>2.5</sub> , PM <sub>10</sub> , CO, NO <sub>2</sub> , SO <sub>2</sub> | Spring, summer, fall, winter         | Entire China                                                                                                       |
| J. Hu et al. (2017a)       | CMAQ      | O <sub>3</sub> , CO, NO <sub>2</sub> , SO <sub>2</sub> , PM <sub>2.5</sub> , PM <sub>10</sub> , O <sub>3</sub> (1-hr max)          | Annual                               | Entire China, Northeast, NCP, Northwest, YRD, Central China, Sichuan Basin, PRD + Southwest, Southwest + PRD       |
| J. Hu et al. (2017b)       | CMAQ      | VOC, isoprene, EC, OC                                                                                                              | Spring, summer, winter               | YRD, BTH, PRD                                                                                                      |
| Hu et al. (2018)           | WRF-Chem  | O <sub>3</sub>                                                                                                                     | Summer                               | YRD                                                                                                                |
| Hu et al. (2019)           | WRF-Chem  | PM <sub>2.5</sub> , PM <sub>10</sub>                                                                                               | Winter                               | Sichuan Basin, Southwest                                                                                           |
| Huang et al. (2014)        | CMAQ      | Visibility                                                                                                                         | Annual                               | YRD                                                                                                                |
| X. Huang et al. (2016)     | WRF-Chem  | alkene, aromatic, isoprene                                                                                                         | Summer                               | YRD                                                                                                                |
| Z. Huang et al. (2016)     | CAMx      | O <sub>3</sub> , NO <sub>2</sub> , NO <sub>x</sub> , SO <sub>2</sub> , PM <sub>10</sub> , PM <sub>2.5</sub>                        | Spring, fall                         | PRD                                                                                                                |
| Huang et al. (2019)        | CAMx      | PM <sub>2.5</sub> , PM <sub>10</sub>                                                                                               | Winter                               | YRD                                                                                                                |
| Itahashi et al. (2012)     | CMAQ      | PM <sub>2.5</sub>                                                                                                                  | Summer                               | Entire China                                                                                                       |
| S. Itahashi et al. (2015a) | CAMx      | O <sub>3</sub>                                                                                                                     | Fall                                 | Entire China                                                                                                       |
| S. Itahashi et al. (2015b) | CMAQ      | nitrate                                                                                                                            | Annual                               | Entire China                                                                                                       |
| Jeong et al. (2013)        | GEOS-Chem | O <sub>3</sub> , sulfate, nitrate, ammonium                                                                                        | Annual, spring, summer, fall, winter | Entire China                                                                                                       |
| Jia et al. (2017)          | CAMx      | PM <sub>2.5</sub>                                                                                                                  | Winter                               | BTH                                                                                                                |
| Jia et al. (2018)          | CMAQ      | sulfate, nitrate                                                                                                                   | Spring, summer, fall, winter         | BTH                                                                                                                |
| Jiang et al. (2008)        | WRF-Chem  | O <sub>3</sub> , NO <sub>x</sub>                                                                                                   | Fall                                 | PRD                                                                                                                |
| Jiang et al. (2013)        | GEOS-Chem | sulfate, nitrate, EC                                                                                                               | Annual                               | Entire China                                                                                                       |
| Kang et al. (2019)         | CMAQ      | OM, EC, nitrate, ammonium, sulfate, PM <sub>2.5</sub>                                                                              | Spring                               | YRD + Southeast, YRD, Southeast                                                                                    |
| Kim et al. (2017)          | CAMx      | PM <sub>2.5</sub>                                                                                                                  | Fall                                 | Sichuan Basin, PRD, Northeast, YRD, BTH                                                                            |
| Kong et al. (2019)         | GEOS-Chem | NO <sub>2</sub> column                                                                                                             | Summer                               | YRD                                                                                                                |
| Koo et al. (2015)          | CAMx      | PM <sub>10</sub>                                                                                                                   | Summer, winter                       | Entire China                                                                                                       |
| Kuhlmann et al. (2015)     | CMAQ      | NO <sub>2</sub> column                                                                                                             | Fall + winter                        | PRD                                                                                                                |

|                      |           |                                                                                  |                                      |                                                                         |
|----------------------|-----------|----------------------------------------------------------------------------------|--------------------------------------|-------------------------------------------------------------------------|
| Kwok et al. (2010)   | CMAQ      | sulfate, OC, EC, ammonium, nitrate, CI, Na                                       | Spring, summer, fall, winter         | PRD                                                                     |
| Lai et al. (2019)    | CMAQ      | PM <sub>2.5</sub>                                                                | Spring, winter                       | Southeast                                                               |
| Lang et al. (2013)   | CMAQ      | PM <sub>2.5</sub>                                                                | Spring, summer, fall, winter         | BTH                                                                     |
| Lang et al. (2017)   | CMAQ      | SO <sub>2</sub> , NO <sub>2</sub>                                                | Spring, summer, fall, winter         | BTH                                                                     |
| Li et al. (2007)     | NAQPMS    | O <sub>3</sub>                                                                   | Spring, summer, fall, winter         | NCP, YRD, Northwest                                                     |
| Li et al. (2008)     | NAQPMS    | O <sub>3</sub> , CO, NO <sub>x</sub> , EC                                        | Summer                               | NCP                                                                     |
| L. Li et al. (2011)  | CMAQ      | SO <sub>2</sub> , NO <sub>2</sub> , PM <sub>10</sub>                             | Summer, winter                       | YRD                                                                     |
| J. Li et al. (2011)  | NAQPMS    | O <sub>3</sub>                                                                   | Summer                               | NCP                                                                     |
| Y. Li et al. (2011)  | WRF-Chem  | HONO, O <sub>3</sub> , NO <sub>2</sub> , NO                                      | Summer                               | BTH                                                                     |
| J. Li et al. (2012)  | NAQPMS    | SO <sub>2</sub> , NO <sub>2</sub> , PM <sub>10</sub>                             | Spring                               | YRD, BTH, NCP, Southwest, Central China                                 |
| L. Li et al. (2012)  | CMAQ      | NO <sub>2</sub> , NO <sub>x</sub> , NO <sub>y</sub> , O <sub>3</sub>             | Summer                               | YRD                                                                     |
| N. Li et al. (2013)  | CMAQ      | OM                                                                               | Fall                                 | PRD                                                                     |
| Y. Li et al. (2013)  | CAMx      | NO <sub>2</sub> , NO <sub>x</sub> , O <sub>3</sub> , Ox                          | Winter                               | PRD                                                                     |
| L. Li et al. (2014)  | CMAQ      | PM <sub>2.5</sub> , nitrate, sulfate, ammonium, OM, EC                           | Fall                                 | YRD                                                                     |
| Y. Li et al. (2014)  | WRF-Chem  | HONO                                                                             | Summer                               | BTH                                                                     |
| L. Li et al. (2015)  | CAMx      | PM <sub>2.5</sub> , sulfate, nitrate, ammonium, OC, EC                           | Fall                                 | YRD                                                                     |
| X. Li et al. (2015)  | CAMx      | PM <sub>2.5</sub>                                                                | Spring, summer, fall, winter         | BTH                                                                     |
| K. Li et al. (2016)  | GEOS-Chem | PM <sub>2.5</sub> , sulfate, nitrate, ammonium, EC, OC                           | Annual, spring, summer, fall, winter | Entire China                                                            |
| L. Li et al. (2016)  | CAMx      | O <sub>3</sub> , NO <sub>2</sub>                                                 | Fall                                 | YRD                                                                     |
| M. Li et al. (2016)  | WRF-Chem  | O <sub>3</sub> , NO <sub>2</sub>                                                 | Spring                               | PRD                                                                     |
| N. Li et al. (2016a) | CMAQ      | SO <sub>2</sub> , NO <sub>x</sub> , O <sub>3</sub> , CO, VOC, PM <sub>2.5</sub>  | Annual                               | Southeast                                                               |
| N. Li et al. (2016b) | WRF-Chem  | EC                                                                               | Annual, spring, summer, fall, winter | Northwest                                                               |
| Q. Li et al. (2016)  | WRF-Chem  | PM <sub>2.5</sub> , NO <sub>2</sub> , O <sub>3</sub> , O <sub>3</sub> (1-hr max) | Winter                               | PRD                                                                     |
| G. Li et al. (2017)  | WRF-Chem  | O <sub>3</sub>                                                                   | Spring                               | NCP, Northeast, Central China, BTH, NCP, YRD, Southwest, Southeast, PRD |
| J. Li et al. (2017a) | NAQPMS    | PM <sub>2.5</sub>                                                                | Fall, winter                         | BTH                                                                     |
| J. Li et al. (2017b) | CMAQ      | PM <sub>2.5</sub> , OM                                                           | Fall                                 | Entire China                                                            |
| J. Li et al. (2017c) | NAQPMS    | PM <sub>2.5</sub>                                                                | Spring                               | Southwest, PRD, YRD                                                     |
| M. Li et al. (2017)  | WRF-Chem  | PM <sub>10</sub> , O <sub>3</sub> , NO <sub>2</sub>                              | Spring                               | YRD                                                                     |
| J. Li et al. (2018)  | CMAQ      | PM <sub>2.5</sub>                                                                | Summer, winter                       | Entire China                                                            |
| L. Li et al. (2018)  | CAMx      | sulfate, nitrate, ammonia, EC, OM                                                | Fall                                 | YRD                                                                     |
| M. Li et al. (2018)  | GEOS-Chem | NO <sub>2</sub> , NO <sub>x</sub> , SO <sub>2</sub>                              | Summer                               | Entire China, BTH+YRD+PRD+Northwest+Southwest                           |
| N. Li et al. (2018)  | WRF-Chem  | NO <sub>x</sub> , PM <sub>2.5</sub> , O <sub>3</sub>                             | Summer                               | Northwest                                                               |
| X. Li et al. (2018)  | WRF-Chem  | PM <sub>2.5</sub> , O <sub>3</sub> , OM, sulfate, nitrate, ammonium              | Winter                               | BTH                                                                     |

|                       |           |                                                                                                             |                                      |                                                                                       |
|-----------------------|-----------|-------------------------------------------------------------------------------------------------------------|--------------------------------------|---------------------------------------------------------------------------------------|
| J. Li et al. (2019)   | CMAQ      | PM <sub>2.5</sub>                                                                                           | Fall, summer                         | Entire China                                                                          |
| L. Li et al. (2019)   | CAMx      | O <sub>3</sub> , NO <sub>2</sub>                                                                            | Spring, summer, fall                 | YRD, BTH                                                                              |
| R. Li et al. (2019)   | CMAQ      | PM <sub>2.5</sub>                                                                                           | Spring, summer, fall, winter         | BTH, NCP, Northwest, Central China, YRD, PRD, Sichuan Basin                           |
| Liao et al. (2014)    | WRF-Chem  | O <sub>3</sub> , PM <sub>10</sub>                                                                           | Summer, winter                       | YRD                                                                                   |
| Liao et al. (2015)    | WRF-Chem  | O <sub>3</sub> , PM <sub>10</sub>                                                                           | Summer, winter                       | YRD                                                                                   |
| Lin et al. (2009)     | CMAQ      | O <sub>3</sub>                                                                                              | Spring + summer                      | Northwest, NCP, YRD, BTH                                                              |
| Lin et al. (2012)     | GEOS-Chem | NO <sub>2</sub> column                                                                                      | Summer, winter                       | BTH+NCP+Central China+YRD+PBD+Southeast                                               |
| Lin et al. (2016)     | CAMx      | NO <sub>x</sub> , O <sub>3</sub> , OM                                                                       | Fall                                 | BTH                                                                                   |
| Liu et al. (2010)     | CMAQ      | SO <sub>2</sub> , NO <sub>2</sub> , O <sub>3</sub> (1-hr max), PM <sub>10</sub> , CO, TRO, AOD              | Spring, summer, fall, winter         | Entire China                                                                          |
| Liu et al. (2017)     | WRF-Chem  | PM <sub>2.5</sub>                                                                                           | Winter                               | PRD                                                                                   |
| H. Liu et al. (2018)  | CMAQ      | O <sub>3</sub> (1-hr max), O <sub>3</sub> (8-hr max)                                                        | Annual, spring, summer, fall, winter | Entire China                                                                          |
| S. Liu et al. (2018)  | WRF-Chem  | NO <sub>2</sub> , SO <sub>2</sub> , PM <sub>10</sub>                                                        | Annual                               | Central China                                                                         |
| Y. Liu et al. (2018)  | CMAQ      | O <sub>3</sub> , NO <sub>2</sub>                                                                            | Summer                               | YRD                                                                                   |
| H. Liu et al. (2019)  | CMAQ      | O <sub>3</sub> , NO <sub>2</sub>                                                                            | Fall                                 | BTH, part of NCP                                                                      |
| L. Liu et al. (2019a) | WRF-Chem  | PM <sub>2.5</sub> , O <sub>3</sub> , NO <sub>2</sub> , SO <sub>2</sub> , nitrate, ammonium, OM              | Summer                               | BTH                                                                                   |
| L. Liu et al. (2019b) | WRF-Chem  | PM <sub>2.5</sub> , O <sub>3</sub> , NO <sub>2</sub> , SO <sub>2</sub> , CO, OM, sulfate, ammonium, nitrate | Winter                               | BTH                                                                                   |
| L. Liu et al. (2019c) | GEOS-Chem | ammonia                                                                                                     | Winter                               | Entire china                                                                          |
| S. Liu et al. (2019)  | CMAQ      | PM <sub>2.5</sub> , As, Se, Pb, Cd, Cr, Ni, Sb, Mn, CO, Cu, Zn                                              | Fall, summer                         | BTH                                                                                   |
| Long et al. (2016)    | WRF-Chem  | PM <sub>2.5</sub> , O <sub>3</sub> , NO <sub>2</sub>                                                        | Fall                                 | BTH, NCP                                                                              |
| Long et al. (2019)    | WRF-Chem  | PM <sub>2.5</sub> , NO <sub>2</sub> , SO <sub>2</sub> , CO                                                  | Winter                               | NCP                                                                                   |
| X. Lu et al. (2016a)  | CAMx      | PM <sub>2.5</sub> , sulfate, nitrate                                                                        | Summer, winter                       | PRD                                                                                   |
| X. Lu et al. (2016b)  | CAMx      | NO <sub>x</sub> , NO <sub>2</sub> , O <sub>3</sub>                                                          | Spring, summer, fall, winter         | PRD                                                                                   |
| Lu et al. (2017)      | NAQPMS    | PM <sub>2.5</sub>                                                                                           | Fall                                 | BTH, NCP, Central China, YRD                                                          |
| X. Lu et al. (2019a)  | CAMx      | PM <sub>2.5</sub>                                                                                           | Spring, winter                       | PRD                                                                                   |
| X. Lu et al. (2019b)  | CAMx      | PM <sub>2.5</sub> , NO <sub>2</sub> , O <sub>3</sub> , SO <sub>2</sub> , sulfate, nitrate, ammonium         | Annual                               | PRD                                                                                   |
| X. Lu et al. (2019c)  | GEOS-Chem | O <sub>3</sub> (8-hr max)                                                                                   | Annual                               | BTH, Central China, NCP, YRD, Northwest, Sichuan Basin, PRD, Central China, Southwest |
| Lv et al. (2018)      | CMAQ      | PM <sub>2.5</sub>                                                                                           | Annual, spring, summer, fall, winter | Entire China                                                                          |
| Lyu et al. (2019)     | CMAQ      | PM <sub>2.5</sub>                                                                                           | Annual                               | Entire China                                                                          |
| Ma et al. (2017)      | GEOS-Chem | PM <sub>2.5</sub>                                                                                           | Annual                               | Northeast, NCP, YRD, Sichuan Basin, PRD                                               |
| C. Ma et al. (2018)   | WRF-Chem  | SO <sub>2</sub> , NO <sub>2</sub> , PM <sub>10</sub> , O <sub>3</sub> , PM <sub>2.5</sub>                   | Fall                                 | BTH                                                                                   |
| X. Ma et al. (2018)   | WRF-Chem  | PM <sub>2.5</sub>                                                                                           | Spring, summer, fall, winter         | BTH                                                                                   |
| Mao et al. (2018)     | WRF-Chem  | methylamine                                                                                                 | Summer                               | YRD                                                                                   |
| Matsui et al. (2009)  | CMAQ      | CO, NO <sub>x</sub> , SO <sub>2</sub> , alkane, alkene, aromatic, sulfate, ammonium,                        | Summer                               | BTH                                                                                   |



|                          |           |                                                                                                                                          |                              |                                                                              |
|--------------------------|-----------|------------------------------------------------------------------------------------------------------------------------------------------|------------------------------|------------------------------------------------------------------------------|
|                          |           | nitrate, EC, OC, PM <sub>2.5</sub> , O <sub>3</sub>                                                                                      |                              |                                                                              |
| Meng et al. (2019)       | WRF-Chem  | PM <sub>10</sub>                                                                                                                         | Spring                       | Northwest                                                                    |
| Ni et al. (2018)         | WRF-Chem  | PM <sub>2.5</sub> , SO <sub>2</sub>                                                                                                      | Winter                       | YRD                                                                          |
| Pang et al. (2018)       | WRF-Chem  | PM <sub>2.5</sub>                                                                                                                        | Winter                       | Entire China, BTH+YRD+PRD+NCP+Northeast+Central China+Southeast, BTH, YRD    |
| Peng et al. (2011)       | CAMx      | O <sub>3</sub>                                                                                                                           | Spring, summer, fall, winter | Southeast (Taiwan)                                                           |
| W. Peng et al. (2017)    | WRF-Chem  | PM <sub>2.5</sub>                                                                                                                        | Spring, summer, fall, winter | BTH                                                                          |
| Z. Peng et al. (2017)    | WRF-Chem  | PM <sub>2.5</sub>                                                                                                                        | Fall                         | YRD, BTH                                                                     |
| Peng et al. (2018)       | WRF-Chem  | PM <sub>2.5</sub> , PM <sub>10</sub> , SO <sub>2</sub> , NO <sub>2</sub> , CO, O <sub>3</sub>                                            | Fall                         | BTH                                                                          |
| Qiao et al. (2015)       | CMAQ      | sulfate, nitrate, ammonium                                                                                                               | Summer                       | Sichuan Basin                                                                |
| Qiao et al. (2019)       | CMAQ      | O <sub>3</sub>                                                                                                                           | Annual                       | Entire China                                                                 |
| Qiao et al. (2019)       | CMAQ      | PM <sub>2.5</sub> , O <sub>3</sub>                                                                                                       | Summer, winter               | Sichuan Basin                                                                |
| Qin et al. (2015)        | CMAQ      | NO <sub>2</sub> , SO <sub>2</sub> , PM <sub>10</sub> , PM <sub>2.5</sub> , sulfate, ammonium, nitrate, OC, EC, O <sub>3</sub> (8-hr max) | Spring, summer, fall, winter | PRD                                                                          |
| X. Qiu et al. (2017)     | CMAQ      | SO <sub>2</sub> , NO <sub>2</sub>                                                                                                        | Spring, summer, winter       | NCP                                                                          |
| Y. Qiu et al. (2017)     | WRF-Chem  | PM <sub>2.5</sub> , SO <sub>2</sub> , NO <sub>2</sub> , O <sub>3</sub>                                                                   | Winter                       | BTH+NCP                                                                      |
| X. Qiu et al. (2019)     | CMAQ      | NO <sub>2</sub> , PM <sub>2.5</sub> , O <sub>3</sub>                                                                                     | Summer                       | BTH                                                                          |
| Y. Qiu et al. (2019)     | WRF-Chem  | PM <sub>2.5</sub> , NO <sub>2</sub> , PAN, O <sub>3</sub>                                                                                | Winter                       | BTH                                                                          |
| Qu et al. (2014)         | CAMx      | O <sub>3</sub>                                                                                                                           | Fall                         | BTH                                                                          |
| Qu et al. (2019)         | WRF-Chem  | PM <sub>2.5</sub> , NO <sub>2</sub>                                                                                                      | Annual                       | BTH                                                                          |
| Quan et al. (2008)       | CMAQ      | SO <sub>2</sub> , sulfate, NH <sub>3</sub> , ammonium                                                                                    | Annual                       | Entire China                                                                 |
| Reddington et al. (2019) | WRF-Chem  | PM <sub>2.5</sub>                                                                                                                        | Annual                       | Southeast                                                                    |
| Sekiguchi et al. (2018)  | CMAQ      | PM <sub>2.5</sub>                                                                                                                        | Spring + winter              | Entire china, BTH                                                            |
| T. Sha et al. (2019a)    | WRF-Chem  | SO <sub>2</sub> , NO <sub>2</sub> , PM <sub>2.5</sub> , sulfate, nitrate                                                                 | Winter                       | YRD                                                                          |
| T. Sha et al. (2019b)    | WRF-Chem  | SO <sub>2</sub> , NO <sub>2</sub> , ammonia, sulfate, nitrate, ammonium, PM <sub>2.5</sub>                                               | Spring                       | YRD                                                                          |
| Shi et al. (2008)        | CMAQ      | NO <sub>2</sub> column                                                                                                                   | Summer                       | BTH                                                                          |
| Shi et al. (2017)        | CMAQ      | sulfate, nitrate, ammonium                                                                                                               | Annual                       | Entire China                                                                 |
| Shimadera et al. (2014)  | CMAQ      | PM <sub>2.5</sub>                                                                                                                        | Winter                       | East Asia                                                                    |
| Shu et al. (2016)        | CMAQ      | O <sub>3</sub> , NO <sub>2</sub>                                                                                                         | Summer                       | YRD                                                                          |
| Song et al. (2008)       | CMAQ      | AOD                                                                                                                                      | Spring, summer, fall, winter | NCP, BTH, Central China, YRD, Sichuan Basin                                  |
| Sun et al. (2017)        | CAMx      | PM <sub>2.5</sub>                                                                                                                        | Spring, summer, fall, winter | BTH                                                                          |
| Sun et al. (2018)        | CAMx      | PM <sub>2.5</sub>                                                                                                                        | Spring, summer, fall, winter | YRD + Central China                                                          |
| Sun et al. (2019)        | GEOS-Chem | O <sub>3</sub>                                                                                                                           | Summer                       | NCP, BTH + YRD + Sichuan Basin + NCP + Northwest + Southwest + Central China |
| Tang et al. (2013)       | NAQPMS    | CO                                                                                                                                       | Summer                       | BTH                                                                          |
| Tang et al. (2014)       | WRF-Chem  | HONO                                                                                                                                     | Summer                       | BTH                                                                          |

|                        |             |                                                                                                                                                                    |                                          |                                         |
|------------------------|-------------|--------------------------------------------------------------------------------------------------------------------------------------------------------------------|------------------------------------------|-----------------------------------------|
| Tang et al. (2015)     | WRF-Chem    | O <sub>3</sub> , NO <sub>2</sub> , HONO, OH, radical                                                                                                               | Summer                                   | BTH+PRD, BTH, PRD                       |
| Tao et al. (2015)      | WRF-Chem    | O <sub>3</sub> , CO, PM <sub>2.5</sub>                                                                                                                             | Spring + summer + fall,<br>summer + fall | YRD                                     |
| Tao et al. (2018)      | CMAQ        | PM <sub>2.5</sub> , O <sub>3</sub>                                                                                                                                 | Summer, winter                           | BTH                                     |
| Tie et al. (2013)      | WRF-Chem    | CO, O <sub>3</sub> , PM <sub>2.5</sub> , NO <sub>x</sub> , NO <sub>y</sub> , HONO, alkane, alkene, aromatic, OVOCs, VOC                                            | Fall                                     | YRD                                     |
| L. Wang et al. (2010)  | CMAQ        | PM <sub>10</sub> , NO <sub>2</sub> column, AOD                                                                                                                     | Spring, summer, fall, winter             | Entire China                            |
| S. Wang et al. (2010)  | CMAQ        | PM <sub>10</sub> , NO <sub>2</sub> column, PM <sub>2.5</sub>                                                                                                       | Summer                                   | BTH                                     |
| X. Wang et al. (2010a) | WRF-Chem    | SO <sub>2</sub> , NO <sub>2</sub>                                                                                                                                  | Summer                                   | Entire China                            |
| X. Wang et al. (2010b) | CMAQ        | O <sub>3</sub> , NO, NO <sub>2</sub> , NMHC                                                                                                                        | Fall                                     | PRD                                     |
| S. Wang et al. (2011a) | CMAQ        | NO <sub>2</sub> column, SO <sub>2</sub> column, AOD, PM <sub>10</sub> , NO <sub>2</sub> , SO <sub>2</sub> , PM <sub>2.5</sub> , sulfate, nitrate, ammonium, OC, EC | Annual, spring, summer, fall,<br>winter  | NCP, YRD, PRD, NCP+YRD+PRD, BTH         |
| S. Wang et al. (2011b) | CMAQ        | O <sub>3</sub>                                                                                                                                                     | Fall                                     | PRD                                     |
| X. Wang et al. (2011)  | CMAQ        | O <sub>3</sub>                                                                                                                                                     | Fall                                     | PRD                                     |
| L. Wang et al. (2012)  | CMAQ        | PM <sub>10</sub> , SO <sub>2</sub>                                                                                                                                 | Annual                                   | BTH + NCP + Central China               |
| T. Wang et al. (2012)  | WRF-Chem    | PM <sub>10</sub> , SO <sub>2</sub> , NO <sub>2</sub> , API                                                                                                         | Fall                                     | YRD                                     |
| D. Wang et al. (2014)  | CMAQ        | NO <sub>2</sub> , SO <sub>2</sub> , PM <sub>2.5</sub> , PM <sub>10</sub>                                                                                           | Winter                                   | Northwest                               |
| F. Wang et al. (2014)  | WRF-Chem    | O <sub>3</sub> , NO <sub>2</sub>                                                                                                                                   | Summer                                   | BTH                                     |
| L. Wang et al. (2014)  | CMAQ        | PM <sub>2.5</sub> , PM <sub>10</sub>                                                                                                                               | Winter                                   | Entire china, BTH + NCP + Central China |
| Y. Wang et al. (2014)  | GEOS-Chem   | PM <sub>2.5</sub>                                                                                                                                                  | Spring                                   | Entire China                            |
| L. Wang et al. (2015)  | CMAQ        | PM <sub>2.5</sub> , PM <sub>10</sub>                                                                                                                               | Summer, winter                           | BTH                                     |
| N. Wang et al. (2015)  | CMAQ        | O <sub>3</sub> , NO <sub>x</sub>                                                                                                                                   | Fall                                     | PRD                                     |
| Z. Wang et al. (2015)  | CMAQ        | SO <sub>2</sub> , NO <sub>2</sub> , PM <sub>10</sub>                                                                                                               | Spring, summer, fall, winter             | Entire China                            |
| J. Wang et al. (2016a) | WRF-Chem    | O <sub>3</sub> , NO <sub>x</sub> , NO, CO, SO <sub>2</sub>                                                                                                         | Spring                                   | Entire China                            |
| J. Wang et al. (2016b) | CAMx        | sulfate, nitrate                                                                                                                                                   | Annual                                   | Entire China                            |
| L. Wang et al. (2016)  | WRF-Chem    | SO <sub>2</sub> , NO <sub>2</sub> , CO, PM <sub>2.5</sub> , PM <sub>10</sub>                                                                                       | Winter                                   | Entire China                            |
| N. Wang et al. (2016)  | CMAQ        | O <sub>3</sub> , NO <sub>x</sub> , PM <sub>2.5</sub>                                                                                                               | Annual, spring, summer, fall,<br>winter  | PRD                                     |
| Z. Wang et al. (2016)  | CAMx        | PM <sub>2.5</sub>                                                                                                                                                  | Fall                                     | BTH                                     |
| G. Wang et al. (2017)  | CMAQ        | PM <sub>2.5</sub> , nitrate, sulfate, ammonium                                                                                                                     | Fall, summer                             | BTH                                     |
| J. Wang et al. (2017)  | WRF-Chem    | SO <sub>2</sub>                                                                                                                                                    | Winter                                   | Northwest                               |
| Y. Wang et al. (2017)  | CAMx        | PM <sub>2.5</sub>                                                                                                                                                  | Fall                                     | BTH, NCP                                |
| Z. Wang et al. (2017)  | NAQPMS/CMAQ | PM <sub>2.5</sub> , PMC                                                                                                                                            | Winter                                   | NCP+BTH+YRD, BTH                        |
| X. Wang et al. (2018a) | CMAQ        | Hg                                                                                                                                                                 | Annual                                   | Entire China                            |
| X. Wang et al. (2018b) | CAMx        | PM <sub>2.5</sub>                                                                                                                                                  | Fall                                     | BTH                                     |
| Z. Wang et al. (2018)  | NAQPMS      | PM <sub>2.5</sub> , PM <sub>10</sub>                                                                                                                               | Spring                                   | BTH, NCP, YRD                           |

|                        |           |                                                                                                                                                                                                     |                                      |                                                           |
|------------------------|-----------|-----------------------------------------------------------------------------------------------------------------------------------------------------------------------------------------------------|--------------------------------------|-----------------------------------------------------------|
| H. Wang et al. (2019)  | NAQPMS    | PM <sub>2.5</sub> , O <sub>3</sub>                                                                                                                                                                  | Summer                               | NCP, BTH, Central China                                   |
| P. Wang et al. (2019)  | CMAQ      | O <sub>3</sub>                                                                                                                                                                                      | Summer                               | BTH, YRD, PRD, Sichuan Basin                              |
| Q. Wang et al. (2019a) | WRF-Chem  | PM <sub>2.5</sub>                                                                                                                                                                                   | Fall                                 | BTH                                                       |
| Q. Wang et al. (2019b) | CMAQ      | PM <sub>2.5</sub>                                                                                                                                                                                   | Summer, winter                       | Entire China                                              |
| X. Wang et al. (2019a) | CAMx      | PM <sub>2.5</sub> , sulfate, nitrate                                                                                                                                                                | Fall                                 | PRD                                                       |
| X. Wang et al. (2019b) | CAMx      | PM <sub>2.5</sub>                                                                                                                                                                                   | Summer, winter                       | BTH                                                       |
| W. Wei et al. (2018a)  | WRF-Chem  | VOC                                                                                                                                                                                                 | Summer, winter                       | BTH                                                       |
| W. Wei et al. (2018b)  | WRF-Chem  | O <sub>3</sub> (8-hr max), NO <sub>x</sub> , CO                                                                                                                                                     | Summer                               | BTH                                                       |
| Wei et al. (2019)      | WRF-Chem  | O <sub>3</sub> , NO <sub>x</sub> , CO                                                                                                                                                               | Summer                               | BTH                                                       |
| Wu et al. (2011)       | NAQPMS    | SO <sub>2</sub> , PM <sub>10</sub> , NO <sub>2</sub> , O <sub>3</sub>                                                                                                                               | Summer                               | BTH                                                       |
| Wu et al. (2013)       | CAMx      | PM <sub>10</sub> , PM <sub>2.5</sub>                                                                                                                                                                | Spring, winter                       | PRD                                                       |
| J. Wu et al. (2017a)   | WRF-Chem  | PM <sub>2.5</sub> , O <sub>3</sub> , NO <sub>2</sub> , OM, sulfate, nitrate, ammonium                                                                                                               | Summer                               | BTH                                                       |
| J. Wu et al. (2017b)   | NAQPMS    | PM <sub>2.5</sub> , SO <sub>2</sub> , NO <sub>2</sub>                                                                                                                                               | Winter                               | YRD                                                       |
| Wu et al. (2018)       | WRF-Chem  | PM <sub>2.5</sub> , O <sub>3</sub> , NO <sub>3</sub> , OM, sulfate, nitrate, ammonium                                                                                                               | Summer                               | BTH, NCP                                                  |
| M. Xie et al. (2016a)  | WRF-Chem  | O <sub>3</sub> , PM <sub>10</sub>                                                                                                                                                                   | Summer, winter                       | YRD                                                       |
| M. Xie et al. (2016b)  | WRF-Chem  | O <sub>3</sub> , PM <sub>10</sub>                                                                                                                                                                   | Summer, winter                       | PRD, Southwest                                            |
| J. Xing et al. (2011a) | CMAQ      | O <sub>3</sub>                                                                                                                                                                                      | Summer                               | BTH, YRD, PRD, Entire China                               |
| J. Xing et al. (2011b) | CMAQ      | NO <sub>2</sub> , SO <sub>2</sub> , PM <sub>10</sub> , PM <sub>2.5</sub> , O <sub>3</sub> , sulfate, nitrate, ammonium, EC, OC, NO <sub>2</sub> column, SO <sub>2</sub> column, CO column, TOR, AOD | Summer                               | BTH                                                       |
| Xing et al. (2015)     | CMAQ      | SO <sub>2</sub> , NO <sub>2</sub>                                                                                                                                                                   | Annual                               | Entire China                                              |
| Xing et al. (2017)     | CMAQ      | O <sub>3</sub>                                                                                                                                                                                      | Summer, winter                       | BTH, YRD, PRD, Central China, Sichuan Basin, Entire China |
| Xing et al. (2019)     | WRF-Chem  | OM, HONO                                                                                                                                                                                            | Winter                               | BTH                                                       |
| Xu et al. (2015)       | GEOS-Chem | PM <sub>2.5</sub>                                                                                                                                                                                   | Annual, spring, summer, fall, winter | Entire China, BTH, NCP, YRD, Southeast                    |
| Xu et al. (2016)       | WRF-Chem  | PM <sub>2.5</sub>                                                                                                                                                                                   | Annual                               | YRD                                                       |
| Xu et al. (2018)       | CMAQ      | PM <sub>2.5</sub>                                                                                                                                                                                   | Winter                               | Entire China                                              |
| J. Xu et al. (2019)    | WRF-Chem  | O <sub>3</sub> , NO <sub>x</sub>                                                                                                                                                                    | Summer                               | YRD                                                       |
| Z. Xu et al. (2019)    | WRF-Chem  | nitrate, ammonia, HNO <sub>3</sub>                                                                                                                                                                  | Winter                               | Northeast                                                 |
| Xue et al. (2013)      | CMAQ      | SO <sub>2</sub> , NO <sub>2</sub> , AOD                                                                                                                                                             | Annual                               | Entire China, BTH, YRD, PRD                               |
| Xue et al. (2016)      | CMAQ      | PM <sub>10</sub> , PM <sub>2.5</sub> , SO <sub>2</sub> , NO <sub>2</sub>                                                                                                                            | Annual                               | BTH                                                       |
| Yamaji et al. (2010)   | CMAQ      | CO, EC, OC, O <sub>3</sub>                                                                                                                                                                          | Summer                               | NCP                                                       |
| Yang et al. (2015)     | GEOS-Chem | sulfate, nitrate, ammonium, EC, PM <sub>2.5</sub>                                                                                                                                                   | Annual                               | Entire China                                              |
| X. Yang et al. (2018a) | CMAQ      | PM <sub>2.5</sub>                                                                                                                                                                                   | Spring, summer, fall, winter         | BTH                                                       |
| X. Yang et al. (2018b) | CMAQ      | O <sub>3</sub>                                                                                                                                                                                      | Summer                               | BTH                                                       |
| J. Yang et al. (2019)  | WRF-Chem  | EC                                                                                                                                                                                                  | Annual                               | Southwest                                                 |

|                         |               |                                                                                                         |                                      |                                                                        |
|-------------------------|---------------|---------------------------------------------------------------------------------------------------------|--------------------------------------|------------------------------------------------------------------------|
| W. Yang et al. (2019a)  | NAQPMS        | O <sub>3</sub>                                                                                          | Spring, summer, fall, winter         | PRD, YRD                                                               |
| W. Yang et al. (2019b)  | NAQPMS        | PM <sub>2.5</sub>                                                                                       | Annual                               | BTH, NCP, Northeast, Northwest, Central China, YRD                     |
| X. Yang et al. (2019)   | CMAQ          | PM <sub>10</sub> , PM <sub>2.5</sub>                                                                    | Annual                               | Northwest                                                              |
| Yao et al. (2014)       | CAMx          | ammonium, sulfate, nitrate                                                                              | Winter                               | PRD                                                                    |
| Yao et al. (2017)       | WRF-Chem      | EC, OC                                                                                                  | Summer                               | YRD                                                                    |
| Ye et al. (2019)        | CMAQ          | PM <sub>2.5</sub> , sulfate, nitrate, ammonium                                                          | Annual, spring, summer, fall, winter | BTH                                                                    |
| Yin et al. (2017)       | CAMx          | PM <sub>10</sub>                                                                                        | Spring, summer, fall, winter         | PRD                                                                    |
| Yin et al. (2018)       | CAMx          | O <sub>3</sub> , NO <sub>2</sub> , SO <sub>2</sub> , PM <sub>10</sub> , PM <sub>2.5</sub>               | Spring, fall                         | PRD                                                                    |
| Ying et al. (2014)      | CMAQ          | PM <sub>2.5</sub> , nitrate, sulfate                                                                    | Summer, winter                       | Entire China, BTH, PRD                                                 |
| Ying et al. (2018)      | CMAQ          | OC, EC, Na, Al, Si, Cl, K, Ca, Ti, Cr, Mn, Fe, Cu, Zn, As, Ba, Pb                                       | Annual                               | Entire China                                                           |
| Yu et al. (2012)        | WRF-Chem      | O <sub>3</sub>                                                                                          | Spring                               | BTH, YRD                                                               |
| Yu et al. (2014)        | WRF-Chem      | O <sub>3</sub>                                                                                          | Summer                               | BTH                                                                    |
| Yu et al. (2018)        | WRF-Chem      | PM <sub>1</sub>                                                                                         | Summer + fall                        | YRD                                                                    |
| Zeren et al. (2019)     | WRF-Chem      | O <sub>3</sub> , NO <sub>2</sub>                                                                        | Fall                                 | PRD                                                                    |
| Zhai et al. (2016)      | CMAQ          | PM <sub>2.5</sub>                                                                                       | Fall                                 | BTH                                                                    |
| Zhang et al. (2013)     | CMAQ          | O <sub>3</sub> , NO <sub>x</sub> , PM <sub>10</sub>                                                     | Fall                                 | PRD                                                                    |
| B. Zhang et al. (2015)  | WRF-Chem      | PM <sub>2.5</sub>                                                                                       | Winter                               | Northeast                                                              |
| L. Zhang et al. (2015a) | WRF-Chem      | O <sub>3</sub>                                                                                          | Summer                               | YRD                                                                    |
| L. Zhang et al. (2015b) | WRF-Chem      | PM <sub>2.5</sub>                                                                                       | Winter                               | BTH                                                                    |
| L. Zhang et al. (2016)  | GEOS-Chem     | PM <sub>2.5</sub>                                                                                       | Fall                                 | BTH                                                                    |
| Y. Zhang et al. (2016)  | WRF-Chem/CMAQ | SO <sub>2</sub> , PM <sub>10</sub> , CO, NO, NO <sub>2</sub> , PM <sub>2.5</sub> , O <sub>3</sub>       | Spring, summer, fall, winter         | Entire China, PRD, Southeast                                           |
| L. Zhang et al. (2017a) | WRF-Chem      | O <sub>3</sub>                                                                                          | Summer                               | Entire China                                                           |
| L. Zhang et al. (2017b) | WRF-Chem      | O <sub>3</sub>                                                                                          | Spring                               | YRD                                                                    |
| Z. Zhang et al. (2017a) | WRF-Chem      | PM <sub>2.5</sub>                                                                                       | Fall + winter                        | BTH                                                                    |
| Z. Zhang et al. (2017b) | CMAQ          | PM <sub>2.5</sub>                                                                                       | Winter                               | BTH                                                                    |
| H. Zhang et al. (2018)  | CAMx          | PM <sub>2.5</sub> , sulfate, nitrate, ammonium, OM                                                      | Fall                                 | BTH                                                                    |
| L. Zhang et al. (2018)  | WRF-Chem      | PM <sub>2.5</sub> , CO, NO <sub>2</sub> , O <sub>3</sub> , SO <sub>2</sub> , sulfate, nitrate, ammonium | Winter                               | YRD                                                                    |
| X. Zhang et al. (2018)  | WRF-Chem      | PM <sub>2.5</sub>                                                                                       | Annual                               | Entire China                                                           |
| Y. Zhang et al. (2018)  | GEOS-Chem     | OM                                                                                                      | Annual                               | Northwest, BTH, YRD, Central China, Southwest, Northeast, Entire China |
| G. Zhang et al. (2019)  | CMAQ          | PM <sub>2.5</sub>                                                                                       | Winter                               | Entire China                                                           |
| H. Zhang et al. (2019a) | CAMx          | PM <sub>2.5</sub> , ammonium, sulfate, nitrate, OM                                                      | Spring, summer, fall, winter         | BTH                                                                    |
| H. Zhang et al. (2019b) | CAMx          | PM <sub>2.5</sub>                                                                                       | Summer, winter                       | BTH                                                                    |
| J. Zhang et al. (2019)  | WRF-Chem      | HONO, OM                                                                                                | Summer                               | BTH                                                                    |

|                         |           |                                                                                           |                              |                                                               |
|-------------------------|-----------|-------------------------------------------------------------------------------------------|------------------------------|---------------------------------------------------------------|
| L. Zhang et al. (2019)  | WRF-Chem  | PM <sub>2.5</sub>                                                                         | Fall                         | Sichuan Basin                                                 |
| Q. Zhang et al. (2019a) | GEOS-Chem | ammonia                                                                                   | Summer, winter               | NCP, BTH                                                      |
| Q. Zhang et al. (2019b) | CMAQ      | PM <sub>2.5</sub>                                                                         | Winter                       | Southeast                                                     |
| S. Zhang et al. (2019)  | CMAQ      | SO <sub>2</sub> , NO <sub>2</sub> , PM <sub>2.5</sub>                                     | Winter                       | BTH                                                           |
| Zhao et al. (2013)      | CMAQ      | NO <sub>2</sub> column, AOD, PM <sub>10</sub>                                             | Spring, summer, fall, winter | Entire ChinaNCP+YRD+PRD                                       |
| Zhao et al. (2015)      | WRF-Chem  | EC                                                                                        | Winter                       | Northwest                                                     |
| Y. Zhao et al. (2017a)  | CMAQ      | O <sub>3</sub>                                                                            | Spring, summer, fall, winter | YRD                                                           |
| Y. Zhao et al. (2017b)  | GEOS-Chem | ammonium, nitrate, ammonia                                                                | Annual                       | Entire China                                                  |
| Zhao et al. (2019)      | CMAQ      | EC                                                                                        | Spring, summer, fall, winter | YRD                                                           |
| Zheng et al. (2019)     | CMAQ      | O <sub>3</sub> (1-hr max), O <sub>3</sub> (8-hr max), NO <sub>2</sub> , PM <sub>2.5</sub> | Summer, winter               | BTH                                                           |
| G. Zhou et al. (2017)   | WRF-Chem  | PM <sub>2.5</sub> , O <sub>3</sub> (8-hr max)                                             | Annual                       | BTH + NCP + YRD+Central China+Southeast                       |
| Y. Zhou et al. (2017)   | CMAQ      | SO <sub>2</sub> , NO <sub>2</sub> , O <sub>3</sub> , PM <sub>2.5</sub>                    | Fall                         | YRD                                                           |
| Zhu et al. (2015)       | GEOS-Chem | ammonia, ammonium                                                                         | Spring, summer, fall         | Entire China                                                  |
| Zhu et al. (2016)       | GEOS-Chem | O <sub>3</sub>                                                                            | Annual                       | BTH, Northwest, YRD, PRD, Sichuan Basin, Southwest, Northeast |
| Zhu et al. (2017)       | WRF-Chem  | PM <sub>10</sub> , O <sub>3</sub>                                                         | Summer, winter               | PRD                                                           |

---

**Table S3: Definition of regions**

| No. | Region                      | Provinces included                         |
|-----|-----------------------------|--------------------------------------------|
| 1   | Beijing-Tianjin-Hebei (BTH) | Beijing, Tianjin, Hebei                    |
| 2   | Central China               | Shanxi, Henan, Hubei, Hunan, Jiangxi       |
| 3   | North China Plain (NCP)     | Inner Mongolia, Shandong                   |
| 4   | Northeast                   | Liaoning, Heilongjiang, Jilin              |
| 5   | Northwest                   | Xinjiang, Qinghai, Gansu, Ningxia, Shaanxi |
| 6   | Pearl River Delta (PRD)     | Guangdong, Hong Kong, Macau                |
| 7   | Sichuan Basin               | Sichuan, Chongqing                         |
| 8   | Southeast                   | Fujian, Taiwan                             |
| 9   | Southwest                   | Tibet, Yunnan, Guizhou, Hainan, Guangxi    |
| 10  | Yangtze River Delta (YRD)   | Jiangsu, Zhejiang, Shanghai, Anhui         |

**Table S4: List of statistical metrics used in studies compiled in this work**

| No. | Abbreviation        | Metric                                                             | No. of studies used |
|-----|---------------------|--------------------------------------------------------------------|---------------------|
| 1   | R (R <sup>2</sup> ) | Correlation coefficient (coefficient of determination)             | 221                 |
| 2   | NMB                 | Normalized mean bias                                               | 170                 |
| 3   | MB                  | Mean bias                                                          | 132                 |
| 4   | RMSE                | Root mean square error                                             | 118                 |
| 5   | NME                 | Normalized mean error                                              | 111                 |
| 6   | FB                  | Fractional bias                                                    | 66                  |
| 7   | FE                  | Fractional error                                                   | 62                  |
| 8   | IOA                 | Index of agreement                                                 | 57                  |
| 9   | ME                  | Mean error                                                         | 27                  |
| 10  | MNB                 | Mean normalized bias                                               | 15                  |
| 11  | MNE                 | Mean normalized error                                              | 10                  |
| 12  | FAC2                | Fraction of predictions within a factor of two of the observations | 9                   |
| 13  | NMBF                | Normalized mean bias factor                                        | 2                   |
| 14  | Std. dev.           | Standard deviation                                                 | 2                   |
| 15  | Bias Factor         | No definition given                                                | 1                   |
| 16  | CRMSE               | Centered pattern root-mean-square                                  | 1                   |
| 17  | MAD                 | Mean absolute deviation                                            | 1                   |

|    |       |                                       |   |
|----|-------|---------------------------------------|---|
| 18 | MR    | Mean ratio of observed to modelled    | 1 |
| 19 | MRE   | Mean relative error                   | 1 |
| 20 | NMAEF | Normalized mean absolute error factor | 1 |
| 21 | NMSE  | Normalized mean square error          | 1 |
| 22 | PE    | Percent error                         | 1 |
| 23 | RB    | Relative bias                         | 1 |
| 24 | RSMB  | No definition given                   | 1 |
| 25 | UPPA  | Unpaired peak prediction accuracy     | 1 |

**Table S5: Full name of species listed in Figure 3**

| Abbreviation      | Full name                                                           |
|-------------------|---------------------------------------------------------------------|
| AOD               | Aerosol optical depth                                               |
| API               | Air Pollution Index                                                 |
| EC                | Elemental carbon                                                    |
| NO <sub>x</sub>   | NO + NO <sub>2</sub>                                                |
| NO <sub>y</sub>   | Sum of total nitrogen species                                       |
| OC                | Organic carbon                                                      |
| OM                | Organic matter                                                      |
| OVOCs             | Oxygenated VOCs                                                     |
| O <sub>x</sub>    | Ozone + NO <sub>2</sub>                                             |
| PAN               | Peroxyacetyl nitrate                                                |
| PM <sub>1</sub>   | Particulate matter with an aerodynamic diameter of less than 1 μm   |
| PM <sub>10</sub>  | Particulate matter with an aerodynamic diameter of less than 10 μm  |
| PM <sub>2.5</sub> | Particulate matter with an aerodynamic diameter of less than 2.5 μm |
| PMC               | Coarse mode particulate matter                                      |
| TOR               | Tropospheric ozone residual                                         |
| VOC               | Volatile organic compounds                                          |

**Table S6: Quantile values of selected statistical metrics for total PM<sub>2.5</sub> and speciated components**

| Pollutant         | Metric | Unit              | n   | 10%  | 25%  | 33%  | 50%  | 67%    | 75%   | 90%   |
|-------------------|--------|-------------------|-----|------|------|------|------|--------|-------|-------|
| PM <sub>2.5</sub> | R      | -                 | 761 | 0.87 | 0.8  | 0.77 | 0.70 | 0.61   | 0.58  | 0.46  |
| PM <sub>2.5</sub> | IOA    | -                 | 124 | 0.95 | 0.92 | 0.85 | 0.76 | 0.72   | 0.69  | 0.62  |
| PM <sub>2.5</sub> | MB     | μg/m <sup>3</sup> | 436 | 29.5 | 10.3 | 6.5  | -2.5 | -9.1   | -13.1 | -27.8 |
| PM <sub>2.5</sub> | ME     | μg/m <sup>3</sup> | 179 | 96.9 | 43.0 | 36.5 | 30.1 | 23.3   | 20.5  | 13.2  |
| PM <sub>2.5</sub> | NMB    | %                 | 600 | 26.0 | 8.4  | 2.0  | -7.2 | -13.14 | -16.7 | -28.3 |

|                   |      |                   |     |       |       |       |       |       |        |        |
|-------------------|------|-------------------|-----|-------|-------|-------|-------|-------|--------|--------|
| PM <sub>2.5</sub> | NME  | %                 | 479 | 60.3  | 47.5  | 43.5  | 37.2  | 32.4  | 30     | 23.0   |
| PM <sub>2.5</sub> | FB   | %                 | 460 | 31.2  | 13.0  | 6.5   | -4.7  | -14.1 | -20.2  | -35.0  |
| PM <sub>2.5</sub> | FE   | %                 | 440 | 66.9  | 57.7  | 51.9  | 44.7  | 37    | 33     | 24     |
| PM <sub>2.5</sub> | RMSE | µg/m <sup>3</sup> | 332 | 104.1 | 61.3  | 50.4  | 36.9  | 28.5  | 25.1   | 16.0   |
| sulfate           | R    | -                 | 62  | 0.91  | 0.82  | 0.79  | 0.74  | 0.69  | 0.67   | 0.56   |
| sulfate           | IOA  | -                 | 18  | 0.93  | 0.85  | 0.83  | 0.68  | 0.61  | 0.6    | 0.52   |
| sulfate           | MB   | µg/m <sup>3</sup> | 40  | 2.48  | 1.14  | 0.9   | 0.13  | -0.97 | -2.27  | -3.19  |
| sulfate           | ME   | µg/m <sup>3</sup> | 1   | 5.3   | 5.3   | 5.3   | 5.3   | 5.3   | 5.3    | 5.3    |
| sulfate           | NMB  | %                 | 100 | 17.9  | 0.0   | -13.4 | -30.0 | -40.6 | -46.4  | -60.0  |
| sulfate           | NME  | %                 | 36  | 67.8  | 55.0  | 53.6  | 44.4  | 40.4  | 37.0   | 26.42  |
| sulfate           | FB   | %                 | 20  | -7.0  | -33.0 | -33.0 | -42.0 | -50.0 | -57.0  | -71.31 |
| sulfate           | FE   | %                 | 14  | 80.0  | 76.0  | 75.0  | 64.7  | 60.6  | 47.0   | 25.0   |
| sulfate           | RMSE | µg/m <sup>3</sup> | 24  | 26.5  | 8.6   | 7.85  | 4.9   | 1.75  | 1.6    | 1.42   |
| nitrate           | R    | -                 | 79  | 0.88  | 0.79  | 0.75  | 0.68  | 0.61  | 0.55   | 0.24   |
| nitrate           | IOA  | -                 | 21  | 0.95  | 0.89  | 0.87  | 0.75  | 0.53  | 0.48   | 0.35   |
| nitrate           | MB   | µg/m <sup>3</sup> | 44  | 5.7   | 3.4   | 2.3   | 0.9   | 0.2   | -0.2   | -0.7   |
| nitrate           | ME   | µg/m <sup>3</sup> | 1   | 9.7   | 9.7   | 9.7   | 9.7   | 9.7   | 9.7    | 9.7    |
| nitrate           | NMB  | %                 | 121 | 76.2  | 47.0  | 40.2  | 10.2  | -8.7  | -17.0  | -64.0  |
| nitrate           | NME  | %                 | 53  | 96.8  | 79.4  | 71.2  | 60.4  | 47.0  | 45.0   | 36.0   |
| nitrate           | FB   | %                 | 20  | 19.0  | 6.0   | 3.0   | -34.5 | -74.0 | -115.0 | -130.0 |
| nitrate           | FE   | %                 | 14  | 88.5  | 81.0  | 79.4  | 76.0  | 59.1  | 58.0   | 51.0   |
| nitrate           | RMSE | µg/m <sup>3</sup> | 27  | 26.7  | 14.3  | 12.1  | 4.1   | 1.6   | 1.6    | 1.4    |
| ammonium          | R    | -                 | 48  | 0.87  | 0.81  | 0.78  | 0.73  | 0.67  | 0.64   | 0.38   |
| ammonium          | IOA  | -                 | 14  | 0.9   | 0.86  | 0.77  | 0.71  | 0.65  | 0.59   | 0.53   |
| ammonium          | MB   | µg/m <sup>3</sup> | 38  | 2.9   | 0.9   | 0.7   | 0.3   | -0.04 | -0.4   | -0.9   |
| ammonium          | ME   | µg/m <sup>3</sup> | 1   | 4.8   | 4.8   | 4.8   | 4.8   | 4.8   | 4.8    | 4.8    |
| ammonium          | NMB  | %                 | 88  | 34.9  | 21.5  | 13    | 0.1   | -14   | -27.4  | -47.7  |
| ammonium          | NME  | %                 | 32  | 59.9  | 53.5  | 52    | 47    | 41    | 38.6   | 35.5   |
| ammonium          | FB   | %                 | 16  | 44.0  | 10.0  | -1.0  | -18.0 | -34   | -38.6  | -68.0  |



|          |      |                          |    |       |      |      |       |       |       |       |
|----------|------|--------------------------|----|-------|------|------|-------|-------|-------|-------|
| ammonium | FE   | %                        | 10 | 77.4  | 75.0 | 72.0 | 65.0  | 61.0  | 48.8  | 46.3  |
| ammonium | RMSE | $\mu\text{g}/\text{m}^3$ | 13 | 16.3  | 8.4  | 8.2  | 6.7   | 3.8   | 3.5   | 2.0   |
| OC       | R    | -                        | 24 | 0.82  | 0.7  | 0.63 | 0.58  | 0.4   | 0.32  | 0.07  |
| OC       | IOA  | -                        | 5  | 0.86  | 0.79 | 0.79 | 0.63  | 0.62  | 0.62  | 0.54  |
| OC       | MB   | $\mu\text{g}/\text{m}^3$ | 4  | 6.01  | 3.25 | 3.25 | -1.55 | -1.55 | -3.51 | -3.51 |
| OC       | NMB  | %                        | 38 | 8.49  | -29  | -38  | -44.9 | -52   | -60   | -68.6 |
| OC       | NME  | %                        | 14 | 68.6  | 55.7 | 47.2 | 45    | 39.4  | 33    | 31.3  |
| OC       | FB   | %                        | 9  | 27    | 7    | 7    | -24   | -41.6 | -41.6 | -59   |
| OC       | FE   | %                        | 9  | 62    | 53   | 53   | 46.8  | 39    | 39    | 33    |
| OC       | RMSE | $\mu\text{g}/\text{m}^3$ | 4  | 7.3   | 5.8  | 5.8  | 4.6   | 4.6   | 2.71  | 2.7   |
| EC       | R    | -                        | 51 | 0.8   | 0.7  | 0.65 | 0.55  | 0.48  | 0.41  | 0.37  |
| EC       | IOA  | -                        | 8  | 0.92  | 0.64 | 0.64 | 0.57  | 0.55  | 0.5   | 0.49  |
| EC       | MB   | $\mu\text{g}/\text{m}^3$ | 25 | 2.64  | 1.02 | 0.71 | -0.08 | -1.85 | -2.2  | -3.4  |
| EC       | NMB  | %                        | 76 | 61.6  | 10.6 | 0    | -16   | -23.0 | -29.2 | -39.0 |
| EC       | NME  | %                        | 32 | 132.3 | 66.5 | 57.5 | 43.7  | 42.4  | 40.5  | 37    |
| EC       | FB   | %                        | 12 | 48    | 11   | 11   | 7.41  | -52   | -54   | -55   |
| EC       | FE   | %                        | 10 | 56    | 52   | 48   | 43    | 42    | 34    | 29.1  |
| EC       | RMSE | $\mu\text{g}/\text{m}^3$ | 6  | 6.56  | 6.11 | 6.11 | 2.3   | 1.2   | 1.2   | 0.6   |
| OM       | R    | -                        | 22 | 0.82  | 0.74 | 0.7  | 0.64  | 0.58  | 0.57  | 0.48  |
| OM       | IOA  | -                        | 29 | 0.83  | 0.81 | 0.75 | 0.63  | 0.57  | 0.57  | 0.55  |
| OM       | MB   | $\mu\text{g}/\text{m}^3$ | 49 | 5.1   | 0.07 | -0.2 | -1.3  | -6.6  | -7.67 | -12.7 |
| OM       | NMB  | %                        | 35 | 14    | 1.2  | -5.6 | -39.1 | -54.8 | -59.6 | -62.6 |
| OM       | NME  | %                        | 7  | 59.6  | 58   | 56.9 | 44.5  | 38.4  | 34.5  | 27.7  |
| OM       | FB   | %                        | 5  | 39    | 21.7 | 21.7 | -40   | -84   | -84   | -97   |
| OM       | FE   | %                        | 3  | 64.7  | 64.7 | 64.7 | 51.9  | 45    | 45    | 45    |
| OM       | RMSE | $\mu\text{g}/\text{m}^3$ | 34 | 23.5  | 21.4 | 18.4 | 13.8  | 8.9   | 8.8   | 6.9   |

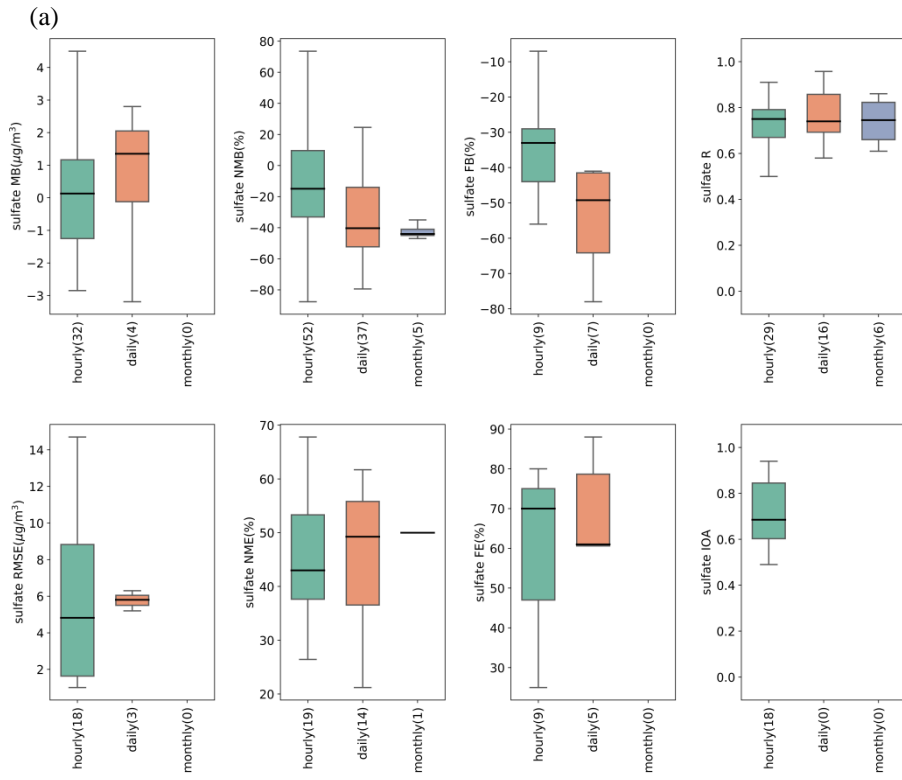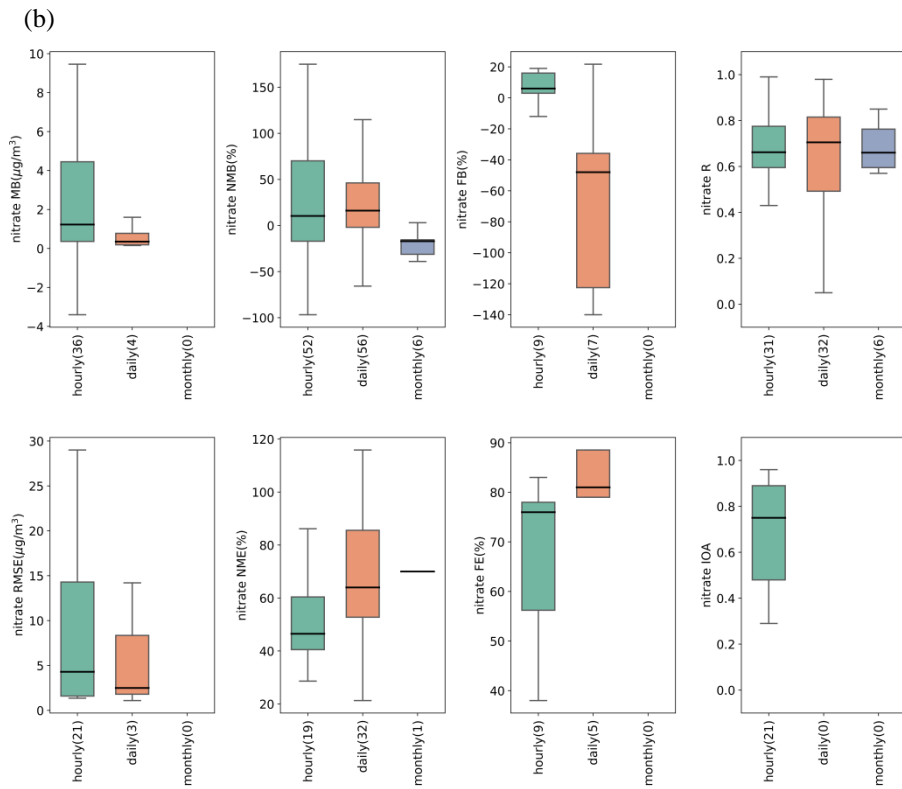

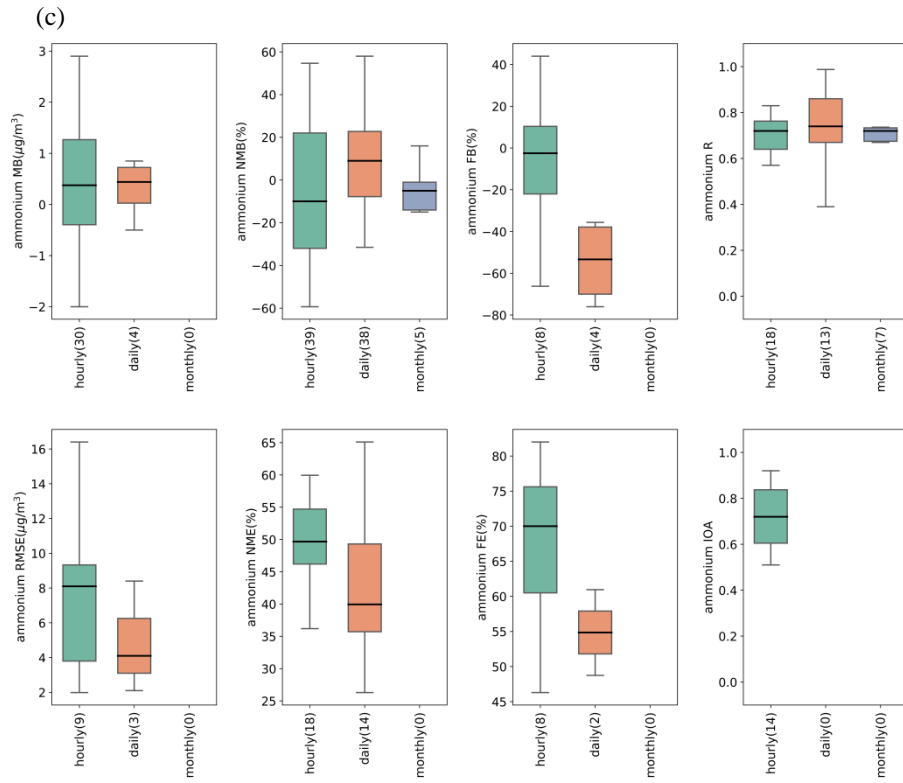

**Figure S1: Quantile distributions of MB, RMSE, NMB, NME, FB, FE, R and IOA of (a) sulfate, (b) nitrate, and (c) ammonium presented by temporal resolution for model validation**

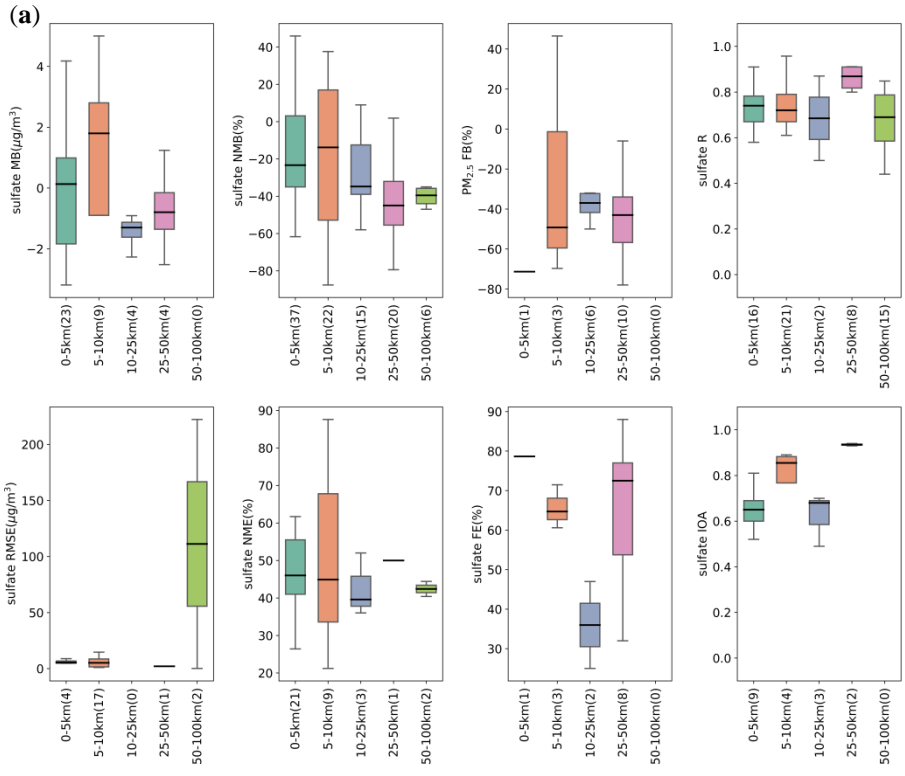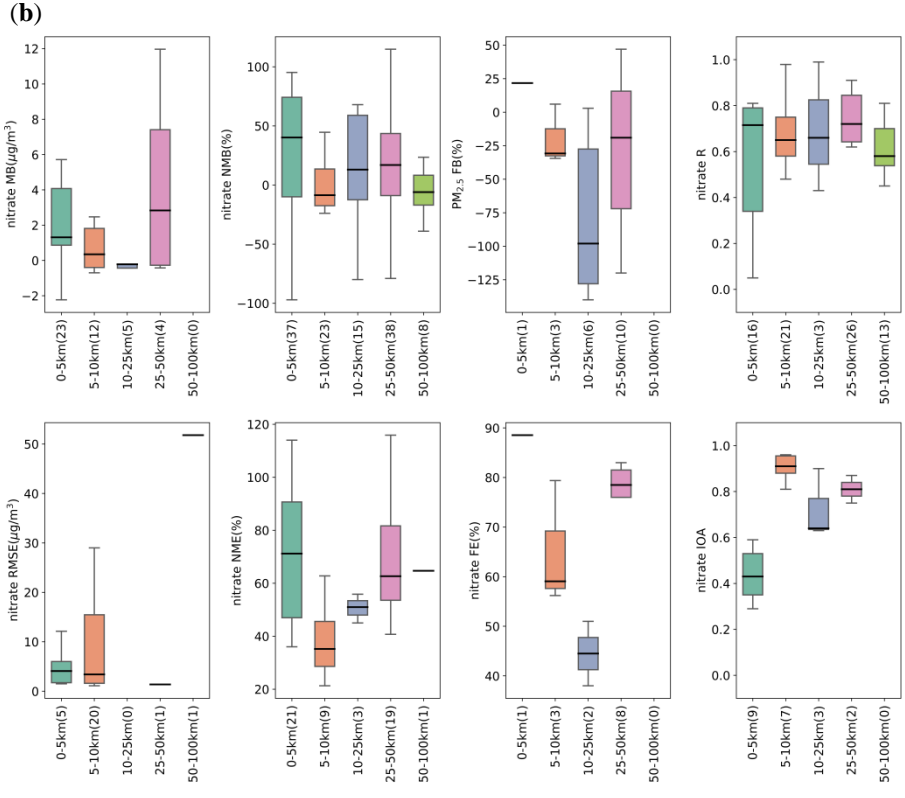

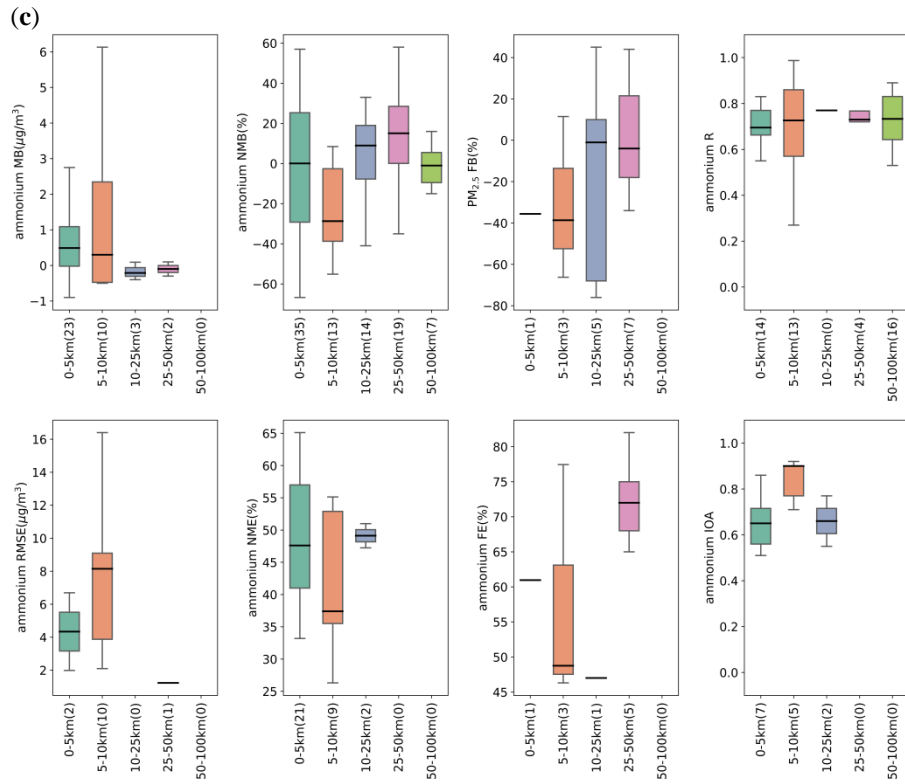

**Figure S2: Quantile distributions of MB, RMSE, NMB, NME, FB, FE, R and IOA of (a) sulfate, (b) nitrate, and (c) ammonium presented by model grid resolution**

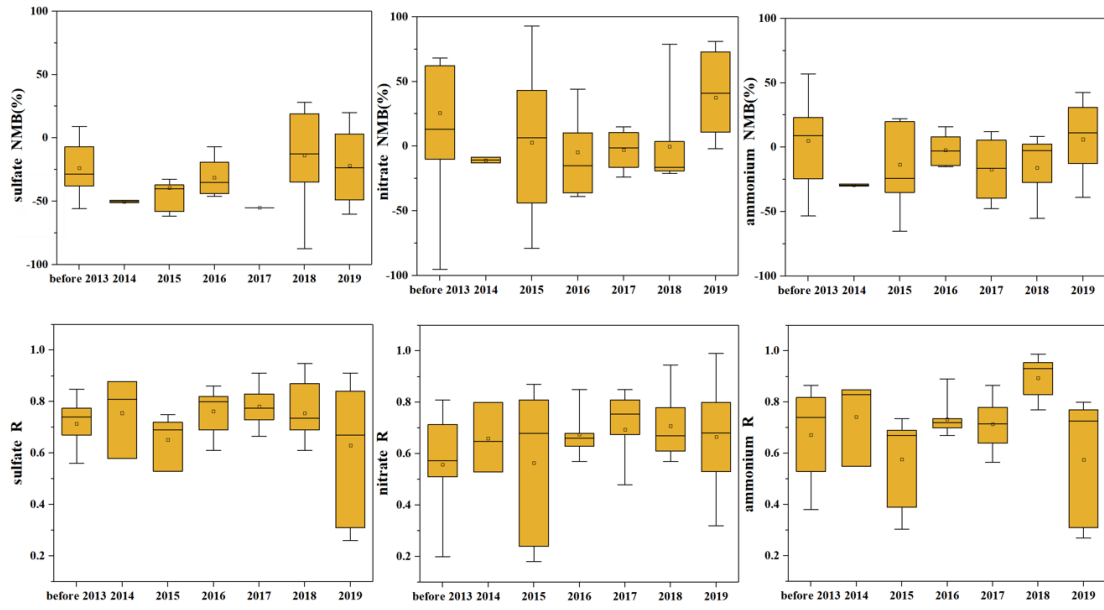

**Figure S3: Quantile distribution of R and NMB of sulfate, nitrate and ammonium presented by data published year**

**Table S7 List of model configurations collected from published studies (see full names below the table)**

| Models    | Emissions <sup>1</sup>      | Gas phase chemistry <sup>2</sup> | Aerosol phase chemistry <sup>3</sup> | Boundary conditions <sup>4</sup> |
|-----------|-----------------------------|----------------------------------|--------------------------------------|----------------------------------|
| CMAQ      | MEIC                        | CB05                             | AERO3                                | Aircraft observation             |
| CAMx      | SOE                         | CB6                              | AERO4                                | CAMx default                     |
| WRF-Chem  | EDGAR                       | CBIV                             | AERO4 + RADM                         | clean                            |
| NAQPMS    | REAS                        | CBM-Z                            | AERO5                                | CMAQ default                     |
| GEOS-Chem | INTEX-B                     | CMAQ                             | AERO6                                | CMAQ modeling results            |
|           | MIX                         | GEOS-Chem default                | CF+SOAP                              | Constant                         |
|           | Self-developed              | Modified but not specified       | CMAQ default                         | FDDA                             |
|           | Streets 2006 + REAS for NH3 | modified CB05                    | CMAQ default + ISORROPIA + VBS       | Forecast results                 |
|           | REAS                        | modified SAPRC11                 | CMU_AQ + MOSAIC                      | GEOS-Chem                        |
|           | MICS-Asia                   | MOZART                           | GEOS-Chem default                    | GEOS-Chem/CMAQ                   |
|           | modified MEIC               | Not specified                    | GOCART                               | MOZART                           |
|           | modified INTEX-B            | RACM                             | ISORROPIA                            | NALROM                           |
|           | TRACE-P                     | RADM2                            | ISORROPIA + NAQPMS SOA               | Not specified                    |
|           | HTAP                        | SAPRC-07                         | ISORROPIA + RADM                     | WRF-Chem default                 |
|           | MACCity                     | SAPRC-11                         | ISORROPIA + RADM + NAQPMS SOA        |                                  |
|           | IIASA                       | SAPRC-99                         | ISORROPIA + RADM + VBS               |                                  |
|           | Streets 2006                |                                  | ISORROPIA + SOAP                     |                                  |
|           | modified Streets            |                                  | ISORROPIA + VBS                      |                                  |
|           | RCP                         |                                  | ISORROPIA + CF                       |                                  |
|           |                             |                                  | ISORROPIA + RADM + SOAP              |                                  |
|           |                             |                                  | ISORROPIA + SOAP                     |                                  |
|           |                             |                                  | ISORROPIA+SOAP+CF                    |                                  |
|           |                             |                                  | ISORROPIA+SOAP+RADM                  |                                  |

ISORROPIA+SORGAM

ISORROPIA+VBS

MADE+SORGAM

---

<sup>1</sup>Emissions: MEIC - Multi-resolution Emission Inventory for China

SOE - Emission Inventory for China by School of Environment at Tsinghua University

EDGAR - Emissions Database for Global Atmospheric Research

REAS - Regional Emission inventory in Asia

INTEX-B - 2006 Asia Emission Inventory for the Intercontinental Chemical Transport Experiment

TRACE-P - Transport and Chemical Evolution over the Pacific

HTAP - Hemispheric Transport of Air Pollution global inventory

MACCity - MACC/CityZEN EU projects

IIASA - International Institute for Applied Systems Analysis

RCP - representative concentration pathway

<sup>2</sup>Gas phase chemistry

CB -Carbon Bond

CBIV - Carbon Bond-IV Mechanism

CBM-Z - Carbon Bond Mechanism version Z

SAPRC - Statewide Air Pollution Research Center

MOZART - Model for OZone and Related chemical Tracers

RACM - Regional Atmospheric Chemistry Mechanism

<sup>3</sup>Aerosol phase chemistry

AERO - aerosol mode

RADM - Regional Acid Deposition Model

VBS - volatility basis set

CMU\_AQ - Carnegie Mellon University aqueous-phase mechanism

MOSAIC - Model for Simulating Aerosol Interactions and Chemistry



GOCART - Goddard Chemistry Aerosol Radiation and Transport

NAQPMS - Nested Air Quality Prediction Model System

MADE - Modal Aerosol Dynamics Model for Europe

SORGAM - Secondary Organic Aerosol Model

<sup>4</sup>Boundary conditions

FDDA - four-dimensional data assimilation

NALROM - NOAA Aeronomy Lab Regional Oxidant Model

## References

- An, J., Li, Y., Chen, Y., Li, J., Qu, Y., and Tang, Y.: Enhancements of major aerosol components due to additional HONO sources in the North China Plain and implications for visibility and haze, *Advances in Atmospheric Sciences*, 30, 57-66, <https://doi.org/10.1007/s00376-012-2016-9>, 2013.
- An, X., Zhu, T., Wang, Z., Li, C., and Wang, Y.: A modeling analysis of a heavy air pollution episode occurred in Beijing, *Atmospheric Chemistry and Physics*, 7, 3103–3114, <https://doi.org/10.5194/acp-7-3103-2007>, 2007.
- An, X., Sun, Z., Lin, W., Jin, M., and Li, N.: Emission inventory evaluation using observations of regional atmospheric background stations of China, *Journal of Environmental Sciences*, 25, 537-546, [https://doi.org/10.1016/s1001-0742\(12\)60082-5](https://doi.org/10.1016/s1001-0742(12)60082-5), 2013.
- Ansari, T. U., Wild, O., Li, J., Yang, T., Xu, W., Sun, Y., and Wang, Z.: Effectiveness of short-term air quality emission controls: a high-resolution model study of Beijing during the Asia-Pacific Economic Cooperation (APEC) summit period, *Atmospheric Chemistry and Physics*, 19, 8651-8668, <https://doi.org/10.5194/acp-19-8651-2019>, 2019.
- Archer-Nicholls, S., Carter, E., Kumar, R., Xiao, Q., Liu, Y., Frostad, J., Forouzanfar, M. H., Cohen, A., Brauer, M., Baumgartner, J., and Wiedinmyer, C.: The Regional Impacts of Cooking and Heating Emissions on Ambient Air Quality and Disease Burden in China, *Environmental Science & Technology*, 50, 9416-9423, <https://doi.org/10.1021/acs.est.6b02533>, 2016.
- Bei, N., Xiao, B., Meng, N., and Feng, T.: Critical role of meteorological conditions in a persistent haze episode in the Guanzhong basin, China, *Science of the Total Environment*, 550, 273-284, <https://doi.org/10.1016/j.scitotenv.2015.12.159>, 2016.
- Bei, N., Zhao, L., Wu, J., Li, X., Feng, T., and Li, G.: Impacts of sea-land and mountain-valley circulations on the air pollution in Beijing-Tianjin-Hebei (BTH): A case study, *Environmental Pollution*, 234, 429-438, <https://doi.org/10.1016/j.envpol.2017.11.066>, 2018.
- Bo, X., Xue, X., Xu, J., Du, X., Zhou, B., and Tang, L.: Aviation's emissions and contribution to the air quality in China, *Atmospheric Environment*, 201, 121-131, <https://doi.org/10.1016/j.atmosenv.2019.01.005>, 2019.
- Bouarar, I., Brasseur, G., Petersen, K., Granier, C., Fan, Q., Wang, X., Wang, L., Ji, D., Liu, Z., Xie, Y., Gao, W., and Elguindi, N.: Influence of anthropogenic emission inventories on simulations of air quality in China during winter and summer 2010, *Atmospheric Environment*, 198, 236-256, <https://doi.org/10.1016/j.atmosenv.2018.10.043>, 2019.
- Campbell, P., Zhang, Y., Wang, K., Leung, R., Fan, J., Zheng, B., Zhang, Q., and He, K.: Evaluation of a multi-scale WRF-CAM5 simulation during the 2010 East Asian Summer Monsoon, *Atmospheric Environment*, 169, 204-217, <https://doi.org/10.1016/j.atmosenv.2017.09.008>, 2017.
- Chang, X., Wang, S., Zhao, B., Cai, S., and Hao, J.: Assessment of inter-city transport of particulate matter in the Beijing–Tianjin–Hebei region, *Atmospheric Chemistry and Physics*, 18, 4843-4858, <https://doi.org/10.5194/acp-18-4843-2018>, 2018.

- Che, W., Zheng, J., Wang, S., Zhong, L., and Lau, A.: Assessment of motor vehicle emission control policies using Model-3/CMAQ model for the Pearl River Delta region, China, *Atmospheric Environment*, 45, 1740-1751, <https://doi.org/10.1016/j.atmosenv.2010.12.050>, 2011.
- Chen, D. S., Cheng, S. Y., Liu, L., Chen, T., and Guo, X. R.: An integrated MM5–CMAQ modeling approach for assessing trans-boundary PM<sub>10</sub> contribution to the host city of 2008 Olympic summer games—Beijing, China, *Atmospheric Environment*, 41, 1237-1250, <https://doi.org/10.1016/j.atmosenv.2006.09.045>, 2007.
- Chen, D., Ma, X., Xie, X., Wei, P., Wen, W., Xu, T., Lang, J., Yang, N., Gao, Q., Shi, H., Guo, X., Li, Y., and Zhou, Y.: Modelling the Effect of Aerosol Feedbacks on the Regional Meteorology Factors over China, *Aerosol and Air Quality Research*, 15, 1559-1579, <https://doi.org/10.4209/aaqr.2014.11.0272>, 2015.
- Chen, D., Liu, Z., Fast, J., and Ban, J.: Simulations of sulfate–nitrate–ammonium (SNA) aerosols during the extreme haze events over northern China in October 2014, *Atmospheric Chemistry and Physics*, 16, 10707-10724, <https://doi.org/10.5194/acp-16-10707-2016>, 2016.
- Chen, D., Liu, X., Lang, J., Zhou, Y., Wei, L., Wang, X., and Guo, X.: Estimating the contribution of regional transport to PM<sub>2.5</sub> air pollution in a rural area on the North China Plain, *Science of the Total Environment*, 583, 280-291, <https://doi.org/10.1016/j.scitotenv.2017.01.066>, 2017a.
- Chen, D., Wang, X., Nelson, P., Li, Y., Zhao, N., Zhao, Y., Lang, J., Zhou, Y., and Guo, X.: Ship emission inventory and its impact on the PM<sub>2.5</sub> air pollution in Qingdao Port, North China, *Atmospheric Environment*, 166, 351-361, <https://doi.org/10.1016/j.atmosenv.2017.07.021>, 2017b.
- Chen, D., Zhao, N., Lang, J., Zhou, Y., Wang, X., Li, Y., Zhao, Y., and Guo, X.: Contribution of ship emissions to the concentration of PM<sub>2.5</sub>: A comprehensive study using AIS data and WRF/Chem model in Bohai Rim Region, China, *Science of the Total Environment*, 610-611, 1476-1486, <https://doi.org/10.1016/j.scitotenv.2017.07.255>, 2018.
- Chen, D., Liu, Z., Ban, J., and Chen, M.: The 2015 and 2016 wintertime air pollution in China: SO<sub>2</sub> emission changes derived from a WRF-Chem/EnKF coupled data assimilation system, *Atmospheric Chemistry and Physics*, 19, 8619-8650, <https://doi.org/10.5194/acp-19-8619-2019>, 2019a.
- Chen, D., Tian, X., Lang, J., Zhou, Y., Li, Y., Guo, X., Wang, W., and Liu, B.: The impact of ship emissions on PM<sub>2.5</sub> and the deposition of nitrogen and sulfur in Yangtze River Delta, China, *Science of the Total Environment*, 649, 1609-1619, <https://doi.org/10.1016/j.scitotenv.2018.08.313>, 2019b.
- Chen, D., Zhang, Y., Lang, J., Ying, Z., Li, Y., Guo, X., Wang, W., and Liu, B.: Evaluation of different control measures in 2014 to mitigate the impact of ship emissions on air quality in the Pearl River Delta, China, *Atmospheric Environment*, 216, <https://doi.org/10.1016/j.atmosenv.2019.116911>, 2019c.

- Chen, L., Zhao, H., Han, B., and Bai, Z.: Combined use of WEPS and Models-3/CMAQ for simulating wind erosion source emission and its environmental impact, *Science of the Total Environment*, 466-467, 762-769, <https://doi.org/10.1016/j.scitotenv.2013.07.090>, 2014.
- Chen, L., Zhang, M., Zhu, J., and Skorokhod, A.: Model analysis of soil dust impacts on the boundary layer meteorology and air quality over East Asia in April 2015, *Atmospheric Research*, 187, 42-56, <https://doi.org/10.1016/j.atmosres.2016.12.008>, 2017a.
- Chen, L., Zhao, H., Wang, W., Bai, Z., Wang, Z., Sun, F., Hou, L., Liu, G., Shi, M., and Miao, Y.: Effect of windblown dust from local and regional sources on the air quality of the central district in Jinan, China, *Atmospheric Research*, 185, 44-52, <https://doi.org/10.1016/j.atmosres.2016.10.026>, 2017b.
- Chen, L., Gao, Y., Zhang, M., Fu, J. S., Zhu, J., Liao, H., Li, J., Huang, K., Ge, B., Wang, X., Lam, Y. F., Lin, C.-Y., Itahashi, S., Nagashima, T., Kajino, M., Yamaji, K., Wang, Z., and Kurokawa, J.-i.: MICS-Asia III: multi-model comparison and evaluation of aerosol over East Asia, *Atmospheric Chemistry and Physics*, 19, 11911-11937, <https://doi.org/10.5194/acp-19-11911-2019>, 2019a.
- Chen, L., Zhu, J., Liao, H., Gao, Y., Qiu, Y., Zhang, M., Liu, Z., Li, N., and Wang, Y.: Assessing the formation and evolution mechanisms of severe haze pollution in the Beijing–Tianjin–Hebei region using process analysis, *Atmospheric Chemistry and Physics*, 19, 10845-10864, <https://doi.org/10.5194/acp-19-10845-2019>, 2019b.
- Chen, T.-F., Chang, K.-H., and Lee, C.-H.: Simulation and analysis of causes of a haze episode by combining CMAQ-IPR and brute force source sensitivity method, *Atmospheric Environment*, 218, <https://doi.org/10.1016/j.atmosenv.2019.117006>, 2019.
- Chen, X., Situ, S., Zhang, Q., Wang, X., Sha, C., Zhou, L., Wu, L., Wu, L., Ye, L., and Li, C.: The synergetic control of NO<sub>2</sub> and O<sub>3</sub> concentrations in a manufacturing city of southern China, *Atmospheric Environment*, 201, 402-416, <https://doi.org/10.1016/j.atmosenv.2018.12.021>, 2019.
- Cheng, J., Su, J., Cui, T., Li, X., Dong, X., Sun, F., Yang, Y., Tong, D., Zheng, Y., Li, Y., Li, J., Zhang, Q., and He, K.: Dominant role of emission reduction in PM<sub>2.5</sub> air quality improvement in Beijing during 2013–2017: a model-based decomposition analysis, *Atmospheric Chemistry and Physics*, 19, 6125-6146, <https://doi.org/10.5194/acp-19-6125-2019>, 2019.
- Cheng, S., Wang, F., Li, J., Chen, D., Li, M., Zhou, Y., and Ren, Z.: Application of Trajectory Clustering and Source Apportionment Methods for Investigating Trans-Boundary Atmospheric PM<sub>10</sub> Pollution, *Aerosol and Air Quality Research*, 13, 333-342, <https://doi.org/10.4209/aaqr.2012.06.0154>, 2013.
- Cheng, X., Sun, Z., Li, D., Xu, X., Jia, M., and Cheng, S.: Short-term aerosol radiative effects and their regional difference during heavy haze episodes in January 2013 in China, *Atmospheric Environment*, 165, 248-263, <https://doi.org/10.1016/j.atmosenv.2017.06.040>, 2017.
- Cheng, Z., Wang, S., Fu, X., Watson, J. G., Jiang, J., Fu, Q., Chen, C., Xu, B., Yu, J., Chow, J. C., and Hao, J.: Impact of biomass burning on haze pollution in the Yangtze River delta, China: a case study in summer 2011, *Atmospheric Chemistry and Physics*, 14, 4573-4585, <https://doi.org/10.5194/acp-14-4573-2014>, 2014.

- Cui, H., Chen, W., Dai, W., Liu, H., Wang, X., and He, K.: Source apportionment of PM<sub>2.5</sub> in Guangzhou combining observation data analysis and chemical transport model simulation, *Atmospheric Environment*, 116, 262-271, <https://doi.org/10.1016/j.atmosenv.2015.06.054>, 2015.
- Ding, Q., Sun, J., Huang, X., Ding, A., Zou, J., Yang, X., and Fu, C.: Impacts of black carbon on the formation of advection–radiation fog during a haze pollution episode in eastern China, *Atmospheric Chemistry and Physics*, 19, 7759-7774, <https://doi.org/10.5194/acp-19-7759-2019>, 2019.
- Dong, X., Gao, Y., Fu, J. S., Li, J., Huang, K., Zhuang, G., and Zhou, Y.: Probe into gaseous pollution and assessment of air quality benefit under sector dependent emission control strategies over megacities in Yangtze River Delta, China, *Atmospheric Environment*, 79, 841-852, <https://doi.org/10.1016/j.atmosenv.2013.07.041>, 2013.
- Dong, X., Li, J., Fu, J. S., Gao, Y., Huang, K., and Zhuang, G.: Inorganic aerosols responses to emission changes in Yangtze River Delta, China, *Science of the Total Environment*, 481, 522-532, <https://doi.org/10.1016/j.scitotenv.2014.02.076>, 2014.
- Du, H., Li, J., Chen, X., Wang, Z., Sun, Y., Fu, P., Li, J., Gao, J., and Wei, Y.: Modeling of aerosol property evolution during winter haze episodes over a megacity cluster in northern China: roles of regional transport and heterogeneous reactions of SO<sub>2</sub>, *Atmospheric Chemistry and Physics*, 19, 9351-9370, <https://doi.org/10.5194/acp-19-9351-2019>, 2019.
- Fan, Q., Lan, J., Liu, Y., Wang, X., Chan, P., Hong, Y., Feng, Y., Liu, Y., Zeng, Y., and Liang, G.: Process analysis of regional aerosol pollution during spring in the Pearl River Delta region, China, *Atmospheric Environment*, 122, 829-838, <https://doi.org/10.1016/j.atmosenv.2015.09.013>, 2015.
- Feng, J., Zhang, Y., Li, S., Mao, J., Patton, A. P., Zhou, Y., Ma, W., Liu, C., Kan, H., Huang, C., An, J., Li, L., Shen, Y., Fu, Q., Wang, X., Liu, J., Wang, S., Ding, D., Cheng, J., Ge, W., Zhu, H., and Walker, K.: The influence of spatiality on shipping emissions, air quality and potential human exposure in the Yangtze River Delta/Shanghai, China, *Atmospheric Chemistry and Physics*, 19, 6167-6183, <https://doi.org/10.5194/acp-19-6167-2019>, 2019.
- Feng, S., Jiang, F., Jiang, Z., Wang, H., Cai, Z., and Zhang, L.: Impact of 3DVAR assimilation of surface PM<sub>2.5</sub> observations on PM<sub>2.5</sub> forecasts over China during wintertime, *Atmospheric Environment*, 187, 34-49, <https://doi.org/10.1016/j.atmosenv.2018.05.049>, 2018.
- Feng, T., Bei, N., Huang, R.-J., Cao, J., Zhang, Q., Zhou, W., Tie, X., Liu, S., Zhang, T., Su, X., Lei, W., Molina, L. T., and Li, G.: Summertime ozone formation in Xi'an and surrounding areas, China, *Atmospheric Chemistry and Physics*, 16, 4323-4342, <https://doi.org/10.5194/acp-16-4323-2016>, 2016a.
- Feng, T., Li, G., Cao, J., Bei, N., Shen, Z., Zhou, W., Liu, S., Zhang, T., Wang, Y., Huang, R.-j., Tie, X., and Molina, L. T.: Simulations of organic aerosol concentrations during springtime in the Guanzhong Basin, China, *Atmospheric Chemistry and Physics*, 16, 10045-10061, <https://doi.org/10.5194/acp-16-10045-2016>, 2016b.

- Feng, T., Bei, N., Zhao, S., Wu, J., Li, X., Zhang, T., Cao, J., Zhou, W., and Li, G.: Wintertime nitrate formation during haze days in the Guanzhong basin, China: A case study, *Environmental Pollution*, 243, 1057-1067, <https://doi.org/10.1016/j.envpol.2018.09.069>, 2018a.
- Feng, T., Zhou, W., Wu, S., Niu, Z., Cheng, P., Xiong, X., and Li, G.: Simulations of summertime fossil fuel CO<sub>2</sub> in the Guanzhong basin, China, *Science of the Total Environment*, 624, 1163-1170, <https://doi.org/10.1016/j.scitotenv.2017.12.021>, 2018b.
- Feng, T., Zhao, S., Bei, N., Wu, J., Liu, S., Li, X., Liu, L., Qian, Y., Yang, Q., Wang, Y., Zhou, W., Cao, J., and Li, G.: Secondary organic aerosol enhanced by increasing atmospheric oxidizing capacity in Beijing–Tianjin–Hebei (BTH), China, *Atmospheric Chemistry and Physics*, 19, 7429-7443, <https://doi.org/10.5194/acp-19-7429-2019>, 2019.
- Feng, X., Fu, T.-M., Cao, H., Tian, H., Fan, Q., and Chen, X.: Neural network predictions of pollutant emissions from open burning of crop residues: Application to air quality forecasts in southern China, *Atmospheric Environment*, 204, 22-31, <https://doi.org/10.1016/j.atmosenv.2019.02.002>, 2019.
- Fu, J., Jang, C., Streets, D., Li, Z., Kwok, R., Park, R., and Han, Z.: MICS-Asia II: Modeling gaseous pollutants and evaluating an advanced modeling system over East Asia, *Atmospheric Environment*, 42, 3571-3583, <https://doi.org/10.1016/j.atmosenv.2007.07.058>, 2008.
- Fu, X., Wang, S. X., Cheng, Z., Xing, J., Zhao, B., Wang, J. D., and Hao, J. M.: Source, transport and impacts of a heavy dust event in the Yangtze River Delta, China, in 2011, *Atmospheric Chemistry and Physics*, 14, 1239-1254, <https://doi.org/10.5194/acp-14-1239-2014>, 2014.
- Fu, X., Wang, S. X., Ran, L. M., Pleim, J. E., Cooter, E., Bash, J. O., Benson, V., and Hao, J. M.: Estimating NH<sub>3</sub> emissions from agricultural fertilizer application in China using the bi-directional CMAQ model coupled to an agro-ecosystem model, *Atmospheric Chemistry and Physics*, 15, 6637-6649, <https://doi.org/10.5194/acp-15-6637-2015>, 2015.
- Fu, X., Cheng, Z., Wang, S., Hua, Y., Xing, J., and Hao, J.: Local and Regional Contributions to Fine Particle Pollution in Winter of the Yangtze River Delta, China, *Aerosol and Air Quality Research*, 16, 1067-1080, <https://doi.org/10.4209/aaqr.2015.08.0496>, 2016.
- Fu, X., Wang, T., Zhang, L., Li, Q., Wang, Z., Xia, M., Yun, H., Wang, W., Yu, C., Yue, D., Zhou, Y., Zheng, J., and Han, R.: The significant contribution of HONO to secondary pollutants during a severe winter pollution event in southern China, *Atmospheric Chemistry and Physics*, 19, 1-14, <https://doi.org/10.5194/acp-19-1-2019>, 2019.
- Fu, Y., Tai, A. P. K., and Liao, H.: Impacts of historical climate and land cover changes on fine particulate matter (PM<sub>2.5</sub>) air quality in East Asia between 1980 and 2010, *Atmospheric Chemistry and Physics*, 16, 10369-10383, <https://doi.org/10.5194/acp-16-10369-2016>, 2016.
- Gao, J., Zhu, B., Xiao, H., Kang, H., Hou, X., and Shao, P.: A case study of surface ozone source apportionment during a high concentration episode, under frequent shifting wind conditions over the Yangtze River Delta, China, *Science of the Total Environment*, 544, 853-863, <https://doi.org/10.1016/j.scitotenv.2015.12.039>, 2016.

- Gao, J., Zhu, B., Xiao, H., Kang, H., Hou, X., Yin, Y., Zhang, L., and Miao, Q.: Diurnal variations and source apportionment of ozone at the summit of Mount Huang, a rural site in Eastern China, *Environmental Pollution*, 222, 513-522, <https://doi.org/10.1016/j.envpol.2016.11.031>, 2017.
- Gao, L., Zhang, R., Han, Z., Fu, C., Yan, P., Wang, T., Hong, S., and Jiao, L.: A Modeling Study of a Typical Winter PM<sub>2.5</sub> Pollution Episode in a City in Eastern China, *Aerosol and Air Quality Research*, 14, 311-322, <https://doi.org/10.4209/aaqr.2013.02.0054>, 2014.
- Gao, M., Carmichael, G. R., Saide, P. E., Lu, Z., Yu, M., Streets, D. G., and Wang, Z.: Response of winter fine particulate matter concentrations to emission and meteorology changes in North China, *Atmospheric Chemistry and Physics*, 16, 11837-11851, <https://doi.org/10.5194/acp-16-11837-2016>, 2016a.
- Gao, M., Carmichael, G. R., Wang, Y., Saide, P. E., Yu, M., Xin, J., Liu, Z., and Wang, Z.: Modeling study of the 2010 regional haze event in the North China Plain, *Atmospheric Chemistry and Physics*, 16, 1673-1691, <https://doi.org/10.5194/acp-16-1673-2016>, 2016b.
- Gao, M., Liu, Z., Wang, Y., Lu, X., Ji, D., Wang, L., Li, M., Wang, Z., Zhang, Q., and Carmichael, G. R.: Distinguishing the roles of meteorology, emission control measures, regional transport, and co-benefits of reduced aerosol feedbacks in “APEC Blue”, *Atmospheric Environment*, 167, 476-486, <https://doi.org/10.1016/j.atmosenv.2017.08.054>, 2017a.
- Gao, M., Saide, P. E., Xin, J., Wang, Y., Liu, Z., Wang, Y., Wang, Z., Pagowski, M., Guttikunda, S. K., and Carmichael, G. R.: Estimates of Health Impacts and Radiative Forcing in Winter Haze in Eastern China through Constraints of Surface PM<sub>2.5</sub> Predictions, *Environmental Science & Technology*, 51, 2178-2185, <https://doi.org/10.1021/acs.est.6b03745>, 2017b.
- Gao, M., Ji, D., Liang, F., and Liu, Y.: Attribution of aerosol direct radiative forcing in China and India to emitting sectors, *Atmospheric Environment*, 190, 35-42, <https://doi.org/10.1016/j.atmosenv.2018.07.011>, 2018.
- Gao, Y., Liu, X., Zhao, C., and Zhang, M.: Emission controls versus meteorological conditions in determining aerosol concentrations in Beijing during the 2008 Olympic Games, *Atmospheric Chemistry and Physics*, 11, 12437-12451, <https://doi.org/10.5194/acp-11-12437-2011>, 2011.
- Gao, Y., and Zhang, M.: Sensitivity analysis of surface ozone to emission controls in Beijing and its neighboring area during the 2008 Olympic Games, *Journal of Environmental Sciences*, 24, 50-61, [https://doi.org/10.1016/s1001-0742\(11\)60728-6](https://doi.org/10.1016/s1001-0742(11)60728-6), 2012.
- Gbaguidi, A. E., Wang, Z., Wang, W., Yang, T., and Chen, H. S.: Source tagging modeling study of regional contributions to acid rain in summer over Liaoning Province, Northeastern China, *Environmental Pollution*, 235, 780-790, <https://doi.org/10.1016/j.envpol.2017.12.076>, 2018.
- Ge, B. Z., Wang, Z. F., Xu, X. B., Wu, J. B., Yu, X. L., and Li, J.: Wet deposition of acidifying substances in different regions of China and the rest of East Asia: modeling with updated NAQPMS, *Environmental Pollution*, 187, 10-21, <https://doi.org/10.1016/j.envpol.2013.12.014>, 2014.

- Guo, J., He, J., Liu, H., Miao, Y., Liu, H., and Zhai, P.: Impact of various emission control schemes on air quality using WRF-Chem during APEC China 2014, *Atmospheric Environment*, 140, 311-319, <https://doi.org/10.1016/j.atmosenv.2016.05.046>, 2016.
- Han, K. M., Park, R. S., Kim, H. K., Woo, J. H., Kim, J., and Song, C. H.: Uncertainty in biogenic isoprene emissions and its impacts on tropospheric chemistry in East Asia, *Science of the Total Environment*, 463-464, 754-771, <https://doi.org/10.1016/j.scitotenv.2013.06.003>, 2013.
- Han, K. M., Lee, S., Chang, L. S., and Song, C. H.: A comparison study between CMAQ-simulated and OMI-retrieved NO<sub>2</sub> columns over East Asia for evaluation of NO<sub>x</sub> emission fluxes of INTEX-B, CAPSS, and REAS inventories, *Atmospheric Chemistry and Physics*, 15, 1913-1938, <https://doi.org/10.5194/acp-15-1913-2015>, 2015.
- Han, K. M., Song, C. H., Ahn, H. J., Park, R. S., Woo, J. H., Lee, C. K., Richter, A., Burrows, J. P., Kim, J. Y., and Hong, J. H.: Investigation of NO<sub>x</sub> emissions and NO<sub>x</sub>-related chemistry in East Asia using CMAQ-predicted and GOME-derived NO<sub>2</sub> columns, *Atmospheric Chemistry and Physics*, 9, 1017–1036, <https://doi.org/10.5194/acpd-8-17297-2008>, 2009.
- Han, X., Zhang, M., Han, Z., Xin, J., and Liu, X.: Simulation of aerosol direct radiative forcing with RAMS-CMAQ in East Asia, *Atmospheric Environment*, 45, 6576-6592, <https://doi.org/10.1016/j.atmosenv.2011.08.006>, 2011.
- Han, X., Ge, C., Tao, J., Zhang, M., and Zhang, R.: Air Quality Modeling for of a Strong Dust Event in East Asia in March 2010, *Aerosol and Air Quality Research*, 12, 615-628, <https://doi.org/10.4209/aaqr.2011.11.0191>, 2012.
- Han, X., Zhang, M., Tao, J., Wang, L., Gao, J., Wang, S., and Chai, F.: Modeling aerosol impacts on atmospheric visibility in Beijing with RAMS-CMAQ, *Atmospheric Environment*, 72, 177-191, <https://doi.org/10.1016/j.atmosenv.2013.02.030>, 2013.
- Han, X., Zhang, M., Gao, J., Wang, S., and Chai, F.: Modeling analysis of the seasonal characteristics of haze formation in Beijing, *Atmospheric Chemistry and Physics*, 14, 10231-10248, <https://doi.org/10.5194/acp-14-10231-2014>, 2014.
- Han, X., Zhu, L., Wang, S., Meng, X., Zhang, M., and Hu, J.: Modeling study of impacts on surface ozone of regional transport and emissions reductions over North China Plain in summer 2015, *Atmospheric Chemistry and Physics*, 18, 12207-12221, <https://doi.org/10.5194/acp-18-12207-2018>, 2018.
- Hu, J., Wu, L., Zheng, B., Zhang, Q., He, K., Chang, Q., Li, X., Yang, F., Ying, Q., and Zhang, H.: Source contributions and regional transport of primary particulate matter in China, *Environmental Pollution*, 207, 31-42, <https://doi.org/10.1016/j.envpol.2015.08.037>, 2015.
- Hu, J., Chen, J., Ying, Q., and Zhang, H.: One-year simulation of ozone and particulate matter in China using WRF/CMAQ modeling system, *Atmospheric Chemistry and Physics*, 16, 10333-10350, <https://doi.org/10.5194/acp-16-10333-2016>, 2016.



- Hu, J., Li, X., Huang, L., Ying, Q., Zhang, Q., Zhao, B., Wang, S., and Zhang, H.: Ensemble prediction of air quality using the WRF/CMAQ model system for health effect studies in China, *Atmospheric Chemistry and Physics*, 17, 13103-13118, <https://doi.org/10.5194/acp-17-13103-2017>, 2017a.
- Hu, J., Wang, P., Ying, Q., Zhang, H., Chen, J., Ge, X., Li, X., Jiang, J., Wang, S., Zhang, J., Zhao, Y., and Zhang, Y.: Modeling biogenic and anthropogenic secondary organic aerosol in China, *Atmospheric Chemistry and Physics*, 17, 77-92, <https://doi.org/10.5194/acp-17-77-2017>, 2017b.
- Hu, J., Li, Y., Zhao, T., Liu, J., Hu, X.-M., Liu, D., Jiang, Y., Xu, J., and Chang, L.: An important mechanism of regional O<sub>3</sub> transport for summer smog over the Yangtze River Delta in eastern China, *Atmospheric Chemistry and Physics*, 18, 16239-16251, <https://doi.org/10.5194/acp-18-16239-2018>, 2018.
- Hu, Y., Wang, S., Yang, X., Kang, Y., Ning, G., and Du, H.: Impact of winter droughts on air pollution over Southwest China, *Science of the Total Environment*, 664, 724-736, <https://doi.org/10.1016/j.scitotenv.2019.01.335>, 2019.
- Huang, K., Fu, J. S., Gao, Y., Dong, X., Zhuang, G., and Lin, Y.: Role of sectoral and multi-pollutant emission control strategies in improving atmospheric visibility in the Yangtze River Delta, China, *Environmental Pollution*, 184, 426-434, <https://doi.org/10.1016/j.envpol.2013.09.029>, 2014.
- Huang, L., An, J., Koo, B., Yarwood, G., Yan, R., Wang, Y., Huang, C., and Li, L.: Sulfate formation during heavy winter haze events and the potential contribution from heterogeneous SO<sub>2</sub> + NO<sub>2</sub> reactions in the Yangtze River Delta region, China, *Atmospheric Chemistry and Physics*, 19, 14311-14328, <https://doi.org/10.5194/acp-19-14311-2019>, 2019.
- Huang, X., Zhou, L., Ding, A., Qi, X., Nie, W., Wang, M., Chi, X., Petäjä T., Kerminen, V.-M., Roldin, P., Rusanen, A., Kulmala, M., and Boy, M.: Comprehensive modelling study on observed new particle formation at the SORPES station in Nanjing, China, *Atmospheric Chemistry and Physics*, 16, 2477-2492, <https://doi.org/10.5194/acp-16-2477-2016>, 2016.
- Huang, Z., Ou, J., Zheng, J., Yuan, Z., Yin, S., Chen, D., and Tan, H.: Process Contributions to Secondary Inorganic Aerosols during Typical Pollution Episodes over the Pearl River Delta Region, China, *Aerosol and Air Quality Research*, 16, 2129-2144, <https://doi.org/10.4209/aaqr.2015.12.0668>, 2016.
- Itahashi, S., Uno, I., and Kim, S.: Source contributions of sulfate aerosol over East Asia estimated by CMAQ-DDM, *Environmental Science & Technology*, 46, 6733-6741, <https://doi.org/10.1021/es300887w>, 2012.
- Itahashi, S., Hayami, H., and Uno, I.: Comprehensive study of emission source contributions for tropospheric ozone formation over East Asia, *Journal of Geophysical Research: Atmospheres*, 120, 331-358, <https://doi.org/10.1002/2014jd022117>, 2015a.
- Itahashi, S., Uno, I., Hayami, H., and Fujita, S.-i.: Variation of the ratio of nitrate to non-seasalt sulfate in precipitation over East Asia with emissions from China, *Atmospheric Environment*, 118, 87-97, <https://doi.org/10.1016/j.atmosenv.2015.07.032>, 2015b.

- Jeong, J. I., and Park, R. J.: Effects of the meteorological variability on regional air quality in East Asia, *Atmospheric Environment*, 69, 46-55, <https://doi.org/10.1016/j.atmosenv.2012.11.061>, 2013.
- Jia, J., Cheng, S., Liu, L., Lang, J., Wang, G., Chen, G., and Liu, X.: An Integrated WRF-CAMx Modeling Approach for Impact Analysis of Implementing the Emergency PM<sub>2.5</sub> Control Measures during Red Alerts in Beijing in December 2015, *Aerosol and Air Quality Research*, 17, 2491-2508, <https://doi.org/10.4209/aaqr.2017.01.0009>, 2017.
- Jia, J., Cheng, S., Yao, S., Xu, T., Zhang, T., Ma, Y., Wang, H., and Duan, W.: Emission characteristics and chemical components of size-segregated particulate matter in iron and steel industry, *Atmospheric Environment*, 182, 115-127, <https://doi.org/10.1016/j.atmosenv.2018.03.051>, 2018.
- Jiang, F., Wang, T., Wang, T., Xie, M., and Zhao, H.: Numerical modeling of a continuous photochemical pollution episode in Hong Kong using WRF-chem, *Atmospheric Environment*, 42, 8717-8727, <https://doi.org/10.1016/j.atmosenv.2008.08.034>, 2008.
- Jiang, H., Liao, H., Pye, H. O. T., Wu, S., Mickley, L. J., Seinfeld, J. H., and Zhang, X. Y.: Projected effect of 2000–2050 changes in climate and emissions on aerosol levels in China and associated transboundary transport, *Atmospheric Chemistry and Physics*, 13, 7937-7960, <https://doi.org/10.5194/acp-13-7937-2013>, 2013.
- Kang, M., Guo, H., Wang, P., Fu, P., Ying, Q., Liu, H., Zhao, Y., and Zhang, H.: Characterization and source apportionment of marine aerosols over the East China Sea, *Science of the Total Environment*, 651, 2679-2688, <https://doi.org/10.1016/j.scitotenv.2018.10.174>, 2019.
- Kim, B.-U., Bae, C., Kim, H. C., Kim, E., and Kim, S.: Spatially and chemically resolved source apportionment analysis: Case study of high particulate matter event, *Atmospheric Environment*, 162, 55-70, <https://doi.org/10.1016/j.atmosenv.2017.05.006>, 2017.
- Kong, H., Lin, J., Zhang, R., Liu, M., Weng, H., Ni, R., Chen, L., Wang, J., Yan, Y., and Zhang, Q.: High-resolution (0.05° × 0.05°) NO<sub>x</sub> emissions in the Yangtze River Delta inferred from OMI, *Atmospheric Chemistry and Physics*, 19, 12835-12856, <https://doi.org/10.5194/acp-19-12835-2019>, 2019.
- Koo, Y.-S., Choi, D.-R., Kwon, H.-Y., Jang, Y.-K., and Han, J.-S.: Improvement of PM<sub>10</sub> prediction in East Asia using inverse modeling, *Atmospheric Environment*, 106, 318-328, <https://doi.org/10.1016/j.atmosenv.2015.02.004>, 2015.
- Kuhlmann, G., Lam, Y. F., Cheung, H. M., Hartl, A., Fung, J. C. H., Chan, P. W., and Wenig, M. O.: Development of a custom OMI NO<sub>2</sub> data product for evaluating biases in a regional chemistry transport model, *Atmospheric Chemistry and Physics*, 15, 5627-5644, <https://doi.org/10.5194/acp-15-5627-2015>, 2015.
- Kwok, R. H. F., Fung, J. C. H., Lau, A. K. H., and Fu, J. S.: Numerical study on seasonal variations of gaseous pollutants and particulate matters in Hong Kong and Pearl River Delta Region, *Journal of Geophysical Research*, 115, <https://doi.org/10.1029/2009jd012809>, 2010.

- Lai, H.-C., Ma, H.-W., Chen, C.-R., Hsiao, M.-C., and Pan, B.-H.: Design and application of a hybrid assessment of air quality models for the source apportionment of PM<sub>2.5</sub>, *Atmospheric Environment*, 212, 116-127, <https://doi.org/10.1016/j.atmosenv.2019.05.038>, 2019.
- Lang, J., Cheng, S., Li, J., Chen, D., Zhou, Y., Wei, X., Han, L., and Wang, H.: A Monitoring and Modeling Study to Investigate Regional Transport and Characteristics of PM<sub>2.5</sub> Pollution, *Aerosol and Air Quality Research*, 13, 943-956, <https://doi.org/10.4209/aaqr.2012.09.0242>, 2013.
- Lang, J., Zhou, Y., Chen, D., Xing, X., Wei, L., Wang, X., Zhao, N., Zhang, Y., Guo, X., Han, L., and Cheng, S.: Investigating the contribution of shipping emissions to atmospheric PM<sub>2.5</sub> using a combined source apportionment approach, *Environmental Pollution*, 229, 557-566, <https://doi.org/10.1016/j.envpol.2017.06.087>, 2017.
- Li, G., Bei, N., Cao, J., Wu, J., Long, X., Feng, T., Dai, W., Liu, S., Zhang, Q., and Tie, X.: Widespread and persistent ozone pollution in eastern China during the non-winter season of 2015: observations and source attributions, *Atmospheric Chemistry and Physics*, 17, 2759-2774, <https://doi.org/10.5194/acp-17-2759-2017>, 2017.
- Li, J., Wang, Z., Akimoto, H., Gao, C., Pochanart, P., and Wang, X.: Modeling study of ozone seasonal cycle in lower troposphere over east Asia, *Journal of Geophysical Research*, 112, <https://doi.org/10.1029/2006jd008209>, 2007.
- Li, J., Wang, Z., Akimoto, H., Yamaji, K., Takigawa, M., Pochanart, P., Liu, Y., Tanimoto, H., and Kanaya, Y.: Near-ground ozone source attributions and outflow in central eastern China during MTX2006, *Atmospheric Chemistry and Physics*, 8, 7335-7351, <https://doi.org/10.5194/acp-8-7335-2008>, 2008.
- Li, J., Wang, Z., Wang, X., Yamaji, K., Takigawa, M., Kanaya, Y., Pochanart, P., Liu, Y., Irie, H., Hu, B., Tanimoto, H., and Akimoto, H.: Impacts of aerosols on summertime tropospheric photolysis frequencies and photochemistry over Central Eastern China, *Atmospheric Environment*, 45, 1817-1829, <https://doi.org/10.1016/j.atmosenv.2011.01.016>, 2011.
- Li, J., Wang, Z., Zhuang, G., Luo, G., Sun, Y., and Wang, Q.: Mixing of Asian mineral dust with anthropogenic pollutants over East Asia: a model case study of a super-duststorm in March 2010, *Atmospheric Chemistry and Physics*, 12, 7591-7607, <https://doi.org/10.5194/acp-12-7591-2012>, 2012.
- Li, J., Du, H., Wang, Z., Sun, Y., Yang, W., Li, J., Tang, X., and Fu, P.: Rapid formation of a severe regional winter haze episode over a mega-city cluster on the North China Plain, *Environmental Pollution*, 223, 605-615, <https://doi.org/10.1016/j.envpol.2017.01.063>, 2017a.
- Li, J., Zhang, M., Wu, F., Sun, Y., and Tang, G.: Assessment of the impacts of aromatic VOC emissions and yields of SOA on SOA concentrations with the air quality model RAMS-CMAQ, *Atmospheric Environment*, 158, 105-115, <https://doi.org/10.1016/j.atmosenv.2017.03.035>, 2017b.
- Li, J., Zhang, Y., Wang, Z., Sun, Y., Fu, P., Yang, Y., Huang, H., Li, J., Zhang, Q., Lin, C., and Lin, N.-H.: Regional Impact of Biomass Burning in Southeast Asia on Atmospheric Aerosols during the

- 2013 Seven South-East Asian Studies Project, Aerosol and Air Quality Research, 17, 2924-2941, <https://doi.org/10.4209/aaqr.2016.09.0422>, 2017c.
- Li, J., Zhang, M., Tang, G., Wu, F., Alvarado, L. M. A., Vrekoussis, M., Richter, A., and Burrows, J. P.: Investigating missing sources of glyoxal over China using a regional air quality model (RAMS-CMAQ), *Journal of Environmental Sciences*, 71, 108-118, <https://doi.org/10.1016/j.jes.2018.04.021>, 2018.
- Li, J., Zhang, M., Tang, G., Sun, Y., Wu, F., and Xu, Y.: Assessment of dicarbonyl contributions to secondary organic aerosols over China using RAMS-CMAQ, *Atmospheric Chemistry and Physics*, 19, 6481-6495, <https://doi.org/10.5194/acp-19-6481-2019>, 2019.
- Li, K., Liao, H., Zhu, J., and Moch, J. M.: Implications of RCP emissions on future PM<sub>2.5</sub> air quality and direct radiative forcing over China, *Journal of Geophysical Research: Atmospheres*, 121, 12,985-913,008, <https://doi.org/10.1002/2016jd025623>, 2016.
- Li, L., Chen, C. H., Fu, J. S., Huang, C., Streets, D. G., Huang, H. Y., Zhang, G. F., Wang, Y. J., Jang, C. J., Wang, H. L., Chen, Y. R., and Fu, J. M.: Air quality and emissions in the Yangtze River Delta, China, *Atmospheric Chemistry and Physics*, 11, 1621-1639, <https://doi.org/10.5194/acp-11-1621-2011>, 2011.
- Li, L., Chen, C. H., Huang, C., Huang, H. Y., Zhang, G. F., Wang, Y. J., Wang, H. L., Lou, S. R., Qiao, L. P., Zhou, M., Chen, M. H., Chen, Y. R., Streets, D. G., Fu, J. S., and Jang, C. J.: Process analysis of regional ozone formation over the Yangtze River Delta, China using the Community Multi-scale Air Quality modeling system, *Atmospheric Chemistry and Physics*, 12, 10971-10987, <https://doi.org/10.5194/acp-12-10971-2012>, 2012.
- Li, L., Huang, C., Huang, H. Y., Wang, Y. J., Yan, R. S., Zhang, G. F., Zhou, M., Lou, S. R., Tao, S. K., Wang, H. L., Qiao, L. P., Chen, C. H., Streets, D. G., and Fu, J. S.: An integrated process rate analysis of a regional fine particulate matter episode over Yangtze River Delta in 2010, *Atmospheric Environment*, 91, 60-70, <https://doi.org/10.1016/j.atmosenv.2014.03.053>, 2014.
- Li, L., An, J. Y., Zhou, M., Yan, R. S., Huang, C., Lu, Q., Lin, L., Wang, Y. J., Tao, S. K., Qiao, L. P., Zhu, S. H., and Chen, C. H.: Source apportionment of fine particles and its chemical components over the Yangtze River Delta, China during a heavy haze pollution episode, *Atmospheric Environment*, 123, 415-429, <https://doi.org/10.1016/j.atmosenv.2015.06.051>, 2015.
- Li, L., An, J. Y., Shi, Y. Y., Zhou, M., Yan, R. S., Huang, C., Wang, H. L., Lou, S. R., Wang, Q., Lu, Q., and Wu, J.: Source apportionment of surface ozone in the Yangtze River Delta, China in the summer of 2013, *Atmospheric Environment*, 144, 194-207, <https://doi.org/10.1016/j.atmosenv.2016.08.076>, 2016.
- Li, L., An, J., Zhou, M., Qiao, L., Zhu, S., Yan, R., Ooi, C. G., Wang, H., Huang, C., Huang, L., Tao, S., Yu, J., Chan, A., Wang, Y., Feng, J., and Chen, C.: An Integrated Source Apportionment Methodology and Its Application over the Yangtze River Delta Region, China, *Environmental Science & Technology*, 52, 14216-14227, <https://doi.org/10.1021/acs.est.8b01211>, 2018.

- Li, L., An, J., Huang, L., Yan, R., Huang, C., and Yarwood, G.: Ozone source apportionment over the Yangtze River Delta region, China: Investigation of regional transport, sectoral contributions and seasonal differences, *Atmospheric Environment*, 202, 269-280, <https://doi.org/10.1016/j.atmosenv.2019.01.028>, 2019.
- Li, M., Song, Y., Mao, Z., Liu, M., and Huang, X.: Impacts of thermal circulations induced by urbanization on ozone formation in the Pearl River Delta region, China, *Atmospheric Environment*, 127, 382-392, <https://doi.org/10.1016/j.atmosenv.2015.10.075>, 2016.
- Li, M., Wang, T., Han, Y., Xie, M., Li, S., Zhuang, B., and Chen, P.: Modeling of a severe dust event and its impacts on ozone photochemistry over the downstream Nanjing megacity of eastern China, *Atmospheric Environment*, 160, 107-123, <https://doi.org/10.1016/j.atmosenv.2017.04.010>, 2017.
- Li, M., Klimont, Z., Zhang, Q., Martin, R. V., Zheng, B., Heyes, C., Cofala, J., Zhang, Y., and He, K.: Comparison and evaluation of anthropogenic emissions of SO<sub>2</sub> and NO<sub>x</sub> over China, *Atmospheric Chemistry and Physics*, 18, 3433-3456, <https://doi.org/10.5194/acp-18-3433-2018>, 2018.
- Li, N., Fu, T.-M., Cao, J., Lee, S., Huang, X.-F., He, L.-Y., Ho, K.-F., Fu, J. S., and Lam, Y.-F.: Sources of secondary organic aerosols in the Pearl River Delta region in fall: Contributions from the aqueous reactive uptake of dicarbonyls, *Atmospheric Environment*, 76, 200-207, <https://doi.org/10.1016/j.atmosenv.2012.12.005>, 2013.
- Li, N., Chen, J. P., Tsai, I. C., He, Q., Chi, S. Y., Lin, Y. C., and Fu, T. M.: Potential impacts of electric vehicles on air quality in Taiwan, *Science of the Total Environment*, 566-567, 919-928, <https://doi.org/10.1016/j.scitotenv.2016.05.105>, 2016a.
- Li, N., He, Q., Tie, X., Cao, J., Liu, S., Wang, Q., Li, G., Huang, R., and Zhang, Q.: Quantifying sources of elemental carbon over the Guanzhong Basin of China: A consistent network of measurements and WRF-Chem modeling, *Environmental Pollution*, 214, 86-93, <https://doi.org/10.1016/j.envpol.2016.03.046>, 2016b.
- Li, N., He, Q., Greenberg, J., Guenther, A., Li, J., Cao, J., Wang, J., Liao, H., Wang, Q., and Zhang, Q.: Impacts of biogenic and anthropogenic emissions on summertime ozone formation in the Guanzhong Basin, China, *Atmospheric Chemistry and Physics*, 18, 7489-7507, <https://doi.org/10.5194/acp-18-7489-2018>, 2018.
- Li, Q., Zhang, L., Wang, T., Tham, Y. J., Ahmadov, R., Xue, L., Zhang, Q., and Zheng, J.: Impacts of heterogeneous uptake of dinitrogen pentoxide and chlorine activation on ozone and reactive nitrogen partitioning: improvement and application of the WRF-Chem model in southern China, *Atmospheric Chemistry and Physics*, 16, 14875-14890, <https://doi.org/10.5194/acp-16-14875-2016>, 2016.
- Li, R., Mei, X., Wei, L., Han, X., Zhang, M., and Jing, Y.: Study on the contribution of transport to PM<sub>2.5</sub> in typical regions of China using the regional air quality model RAMS-CMAQ, *Atmospheric Environment*, 214, <https://doi.org/10.1016/j.atmosenv.2019.116856>, 2019.

- Li, X., Zhang, Q., Zhang, Y., Zheng, B., Wang, K., Chen, Y., Wallington, T. J., Han, W., Shen, W., Zhang, X., and He, K.: Source contributions of urban PM<sub>2.5</sub> in the Beijing–Tianjin–Hebei region: Changes between 2006 and 2013 and relative impacts of emissions and meteorology, *Atmospheric Environment*, 123, 229-239, <https://doi.org/10.1016/j.atmosenv.2015.10.048>, 2015.
- Li, X., Wu, J., Elser, M., Feng, T., Cao, J., El-Haddad, I., Huang, R., Tie, X., Prévôt, A. S. H., and Li, G.: Contributions of residential coal combustion to the air quality in Beijing–Tianjin–Hebei (BTH), China: a case study, *Atmospheric Chemistry and Physics*, 18, 10675-10691, <https://doi.org/10.5194/acp-18-10675-2018>, 2018.
- Li, Y., An, J., Min, M., Zhang, W., Wang, F., and Xie, P.: Impacts of HONO sources on the air quality in Beijing, Tianjin and Hebei Province of China, *Atmospheric Environment*, 45, 4735-4744, <https://doi.org/10.1016/j.atmosenv.2011.04.086>, 2011.
- Li, Y., Lau, A. K. H., Fung, J. C. H., Ma, H., and Tse, Y.: Systematic evaluation of ozone control policies using an Ozone Source Apportionment method, *Atmospheric Environment*, 76, 136-146, <https://doi.org/10.1016/j.atmosenv.2013.02.033>, 2013.
- Li, Y., An, J., and Gultepe, I.: Effects of additional HONO sources on visibility over the North China Plain, *Advances in Atmospheric Sciences*, 31, 1221-1232, <https://doi.org/10.1007/s00376-014-4019-1>, 2014.
- Liao, J., Wang, T., Wang, X., Xie, M., Jiang, Z., Huang, X., and Zhu, J.: Impacts of different urban canopy schemes in WRF/Chem on regional climate and air quality in Yangtze River Delta, China, *Atmospheric Research*, 145-146, 226-243, <https://doi.org/10.1016/j.atmosres.2014.04.005>, 2014.
- Liao, J., Wang, T., Jiang, Z., Zhuang, B., Xie, M., Yin, C., Wang, X., Zhu, J., Fu, Y., and Zhang, Y.: WRF/Chem modeling of the impacts of urban expansion on regional climate and air pollutants in Yangtze River Delta, China, *Atmospheric Environment*, 106, 204-214, <https://doi.org/10.1016/j.atmosenv.2015.01.059>, 2015.
- Lin, J., An, J., Qu, Y., Chen, Y., Li, Y., Tang, Y., Wang, F., and Xiang, W.: Local and distant source contributions to secondary organic aerosol in the Beijing urban area in summer, *Atmospheric Environment*, 124, 176-185, <https://doi.org/10.1016/j.atmosenv.2015.08.098>, 2016.
- Lin, J. T., Liu, Z., Zhang, Q., Liu, H., Mao, J., and Zhuang, G.: Modeling uncertainties for tropospheric nitrogen dioxide columns affecting satellite-based inverse modeling of nitrogen oxides emissions, *Atmospheric Chemistry and Physics*, 12, 12255-12275, <https://doi.org/10.5194/acp-12-12255-2012>, 2012.
- Lin, M., Holloway, T., Oki, T., Streets, D. G., and Richter, A.: Multi-scale model analysis of boundary layer ozone over East Asia, *Atmospheric Chemistry and Physics*, 9, 3277–3301, <https://doi.org/10.5194/acp-9-3277-2009>, 2009.
- Liu, H., Liu, S., Xue, B., Lv, Z., Meng, Z., Yang, X., Xue, T., Yu, Q., and He, K.: Ground-level ozone pollution and its health impacts in China, *Atmospheric Environment*, 173, 223-230, <https://doi.org/10.1016/j.atmosenv.2017.11.014>, 2018.

- Liu, H., Zhang, M., Han, X., Li, J., and Chen, L.: Episode analysis of regional contributions to tropospheric ozone in Beijing using a regional air quality model, *Atmospheric Environment*, 199, 299-312, <https://doi.org/10.1016/j.atmosenv.2018.11.044>, 2019.
- Liu, L., Bei, N., Wu, J., Liu, S., Zhou, J., Li, X., Yang, Q., Feng, T., Cao, J., Tie, X., and Li, G.: Effects of stabilized Criegee intermediates (sCIs) on sulfate formation: a sensitivity analysis during summertime in Beijing–Tianjin–Hebei (BTH), China, *Atmospheric Chemistry and Physics*, 19, 13341-13354, <https://doi.org/10.5194/acp-19-13341-2019>, 2019a.
- Liu, L., Wu, J., Liu, S., Li, X., Zhou, J., Feng, T., Qian, Y., Cao, J., Tie, X., and Li, G.: Effects of organic coating on the nitrate formation by suppressing the N<sub>2</sub>O<sub>5</sub> heterogeneous hydrolysis: a case study during wintertime in Beijing–Tianjin–Hebei (BTH), *Atmospheric Chemistry and Physics*, 19, 8189-8207, <https://doi.org/10.5194/acp-19-8189-2019>, 2019b.
- Liu, L., Zhang, X., Wong, A. Y. H., Xu, W., Liu, X., Li, Y., Mi, H., Lu, X., Zhao, L., Wang, Z., Wu, X., and Wei, J.: Estimating global surface ammonia concentrations inferred from satellite retrievals, *Atmospheric Chemistry and Physics*, 19, 12051-12066, <https://doi.org/10.5194/acp-19-12051-2019>, 2019c.
- Liu, S., Hua, S., Wang, K., Qiu, P., Liu, H., Wu, B., Shao, P., Liu, X., Wu, Y., Xue, Y., Hao, Y., and Tian, H.: Spatial-temporal variation characteristics of air pollution in Henan of China: Localized emission inventory, WRF/Chem simulations and potential source contribution analysis, *Science of the Total Environment*, 624, 396-406, <https://doi.org/10.1016/j.scitotenv.2017.12.102>, 2018.
- Liu, S., Zhu, C., Tian, H., Wang, Y., Zhang, K., Wu, B., Liu, X., Hao, Y., Liu, W., Bai, X., Lin, S., Wu, Y., Shao, P., and Liu, H.: Spatiotemporal Variations of Ambient Concentrations of Trace Elements in a Highly Polluted Region of China, *Journal of Geophysical Research: Atmospheres*, 124, 4186-4202, <https://doi.org/10.1029/2018jd029562>, 2019.
- Liu, X.-H., Zhang, Y., Cheng, S.-H., Xing, J., Zhang, Q., Streets, D. G., Jang, C., Wang, W.-X., and Hao, J.-M.: Understanding of regional air pollution over China using CMAQ, part I performance evaluation and seasonal variation, *Atmospheric Environment*, 44, 2415-2426, <https://doi.org/10.1016/j.atmosenv.2010.03.035>, 2010.
- Liu, Y., Wang, Y., and Zhang, J.: New machine learning algorithm: Random forest. In *International Conference on Information Computing and Applications*, Springer, Berlin, Heidelberg, 14 September 2012, 246-252, 2012.
- Liu, Y., Hong, Y., Fan, Q., Wang, X., Chan, P., Chen, X., Lai, A., Wang, M., and Chen, X.: Source-receptor relationships for PM<sub>2.5</sub> during typical pollution episodes in the Pearl River Delta city cluster, China, *Science of the Total Environment*, 596-597, 194-206, <https://doi.org/10.1016/j.scitotenv.2017.03.255>, 2017.
- Liu, Y., Li, L., An, J., Huang, L., Yan, R., Huang, C., Wang, H., Wang, Q., Wang, M., and Zhang, W.: Estimation of biogenic VOC emissions and its impact on ozone formation over the Yangtze River

- Delta region, China, *Atmospheric Environment*, 186, 113-128, <https://doi.org/10.1016/j.atmosenv.2018.05.027>, 2018.
- Long, X., Tie, X., Cao, J., Huang, R., Feng, T., Li, N., Zhao, S., Tian, J., Li, G., and Zhang, Q.: Impact of crop field burning and mountains on heavy haze in the North China Plain: a case study, *Atmospheric Chemistry and Physics*, 16, 9675-9691, <https://doi.org/10.5194/acp-16-9675-2016>, 2016.
- Long, X., Tie, X., Zhou, J., Dai, W., Li, X., Feng, T., Li, G., Cao, J., and An, Z.: Impact of the Green Light Program on haze in the North China Plain, China, *Atmospheric Chemistry and Physics*, 19, 11185-11197, <https://doi.org/10.5194/acp-19-11185-2019>, 2019.
- Lu, M., Tang, X., Wang, Z., Gbaguidi, A., Liang, S., Hu, K., Wu, L., Wu, H., Huang, Z., and Shen, L.: Source tagging modeling study of heavy haze episodes under complex regional transport processes over Wuhan megacity, Central China, *Environmental Pollution*, 231, 612-621, <https://doi.org/10.1016/j.envpol.2017.08.046>, 2017.
- Lu, X., and Fung, J.: Source Apportionment of Sulfate and Nitrate over the Pearl River Delta Region in China, *Atmosphere*, 7, <https://doi.org/10.3390/atmos7080098>, 2016a.
- Lu, X., Yao, T., Li, Y., Fung, J. C. H., and Lau, A. K. H.: Source apportionment and health effect of NO<sub>x</sub> over the Pearl River Delta region in southern China, *Environmental Pollution*, 212, 135-146, <https://doi.org/10.1016/j.envpol.2016.01.056>, 2016b.
- Lu, X., Chan, S. C., Fung, J. C. H., and Lau, A. K. H.: To what extent can the below-cloud washout effect influence the PM<sub>2.5</sub>? A combined observational and modeling study, *Environmental Pollution*, 251, 338-343, <https://doi.org/10.1016/j.envpol.2019.04.061>, 2019a.
- Lu, X., Chen, Y., Huang, Y., Lin, C., Li, Z., Fung, J. C. H., and Lau, A. K. H.: Differences in concentration and source apportionment of PM<sub>2.5</sub> between 2006 and 2015 over the PRD region in southern China, *Science of the Total Environment*, 673, 708-718, <https://doi.org/10.1016/j.scitotenv.2019.03.452>, 2019b.
- Lu, X., Zhang, L., Chen, Y., Zhou, M., Zheng, B., Li, K., Liu, Y., Lin, J., Fu, T.-M., and Zhang, Q.: Exploring 2016–2017 surface ozone pollution over China: source contributions and meteorological influences, *Atmospheric Chemistry and Physics*, 19, 8339-8361, <https://doi.org/10.5194/acp-19-8339-2019>, 2019c.
- Lv, Z., Liu, H., Ying, Q., Fu, M., Meng, Z., Wang, Y., Wei, W., Gong, H., and He, K.: Impacts of shipping emissions on PM<sub>2.5</sub> pollution in China, *Atmospheric Chemistry and Physics*, 18, 15811-15824, <https://doi.org/10.5194/acp-18-15811-2018>, 2018.
- Lyu, B., Hu, Y., Zhang, W., Du, Y., Luo, B., Sun, X., Sun, Z., Deng, Z., Wang, X., Liu, J., Wang, X., and Russell, A. G.: Fusion Method Combining Ground-Level Observations with Chemical Transport Model Predictions Using an Ensemble Deep Learning Framework: Application in China to Estimate Spatiotemporally-Resolved PM<sub>2.5</sub> Exposure Fields in 2014-2017, *Environmental Science & Technology*, 53, 7306-7315, <https://doi.org/10.1021/acs.est.9b01117>, 2019.



- Ma, C., Wang, T., Zang, Z., and Li, Z.: Comparisons of Three-Dimensional Variational Data Assimilation and Model Output Statistics in Improving Atmospheric Chemistry Forecasts, *Advances in Atmospheric Sciences*, 35, 813-825, <https://doi.org/10.1007/s00376-017-7179-y>, 2018.
- Ma, Q., Cai, S., Wang, S., Zhao, B., Martin, R. V., Brauer, M., Cohen, A., Jiang, J., Zhou, W., Hao, J., Frostad, J., Forouzanfar, M. H., and Burnett, R. T.: Impacts of coal burning on ambient PM<sub>2.5</sub> pollution in China, *Atmospheric Chemistry and Physics*, 17, 4477-4491, <https://doi.org/10.5194/acp-17-4477-2017>, 2017.
- Ma, X., Sha, T., Wang, J., Jia, H., and Tian, R.: Investigating impact of emission inventories on PM<sub>2.5</sub> simulations over North China Plain by WRF-Chem, *Atmospheric Environment*, 195, 125-140, <https://doi.org/10.1016/j.atmosenv.2018.09.058>, 2018.
- Mao, J., Yu, F., Zhang, Y., An, J., Wang, L., Zheng, J., Yao, L., Luo, G., Ma, W., Yu, Q., Huang, C., Li, L., and Chen, L.: High-resolution modeling of gaseous methylamines over a polluted region in China: source-dependent emissions and implications of spatial variations, *Atmospheric Chemistry and Physics*, 18, 7933-7950, <https://doi.org/10.5194/acp-18-7933-2018>, 2018.
- Matsui, H., Koike, M., Kondo, Y., Takegawa, N., Kita, K., Miyazaki, Y., Hu, M., Chang, S. Y., Blake, D. R., Fast, J. D., Zaveri, R. A., Streets, D. G., Zhang, Q., and Zhu, T.: Spatial and temporal variations of aerosols around Beijing in summer 2006: Model evaluation and source apportionment, *Journal of Geophysical Research*, 114, <https://doi.org/10.1029/2008jd010906>, 2009.
- Meng, L., Yang, X., Zhao, T., He, Q., Lu, H., Mamtimin, A., Huo, W., Yang, F., and Liu, C.: Modeling study on three-dimensional distribution of dust aerosols during a dust storm over the Tarim Basin, Northwest China, *Atmospheric Research*, 218, 285-295, <https://doi.org/10.1016/j.atmosres.2018.12.006>, 2019.
- Ni, Z. Z., Luo, K., Zhang, J. X., Feng, R., Zheng, H. X., Zhu, H. R., Wang, J. F., Fan, J. R., Gao, X., and Cen, K. F.: Assessment of winter air pollution episodes using long-range transport modeling in Hangzhou, China, during World Internet Conference, 2015, *Environmental Pollution*, 236, 550-561, <https://doi.org/10.1016/j.envpol.2018.01.069>, 2018.
- Pang, J., Liu, Z., Wang, X., Bresch, J., Ban, J., Chen, D., and Kim, J.: Assimilating AOD retrievals from GOCI and VIIRS to forecast surface PM<sub>2.5</sub> episodes over Eastern China, *Atmospheric Environment*, 179, 288-304, <https://doi.org/10.1016/j.atmosenv.2018.02.011>, 2018.
- Peng, W., Yang, J., Wagner, F., and Mauzerall, D. L.: Substantial air quality and climate co-benefits achievable now with sectoral mitigation strategies in China, *Science of the Total Environment*, 598, 1076-1084, <https://doi.org/10.1016/j.scitotenv.2017.03.287>, 2017.
- Peng, Y.-P., Chen, K.-S., Wang, H.-K., Lai, C.-H., Lin, M.-H., and Lee, C.-H.: Applying model simulation and photochemical indicators to evaluate ozone sensitivity in southern Taiwan, *Journal of Environmental Sciences*, 23, 790-797, [https://doi.org/10.1016/s1001-0742\(10\)60479-2](https://doi.org/10.1016/s1001-0742(10)60479-2), 2011.

- Peng, Z., Liu, Z., Chen, D., and Ban, J.: Improving PM<sub>2.5</sub> forecast over China by the joint adjustment of initial conditions and source emissions with an ensemble Kalman filter, *Atmospheric Chemistry and Physics*, 17, 4837-4855, <https://doi.org/10.5194/acp-17-4837-2017>, 2017.
- Peng, Z., Lei, L., Liu, Z., Sun, J., Ding, A., Ban, J., Chen, D., Kou, X., and Chu, K.: The impact of multi-species surface chemical observation assimilation on air quality forecasts in China, *Atmospheric Chemistry and Physics*, 18, 17387-17404, <https://doi.org/10.5194/acp-18-17387-2018>, 2018.
- Qiao, X., Tang, Y., Hu, J., Zhang, S., Li, J., Kota, S. H., Wu, L., Gao, H., Zhang, H., and Ying, Q.: Modeling dry and wet deposition of sulfate, nitrate, and ammonium ions in Jiuzhaigou National Nature Reserve, China using a source-oriented CMAQ model: Part I. Base case model results, *Science of the Total Environment*, 532, 831-839, <https://doi.org/10.1016/j.scitotenv.2015.05.108>, 2015.
- Qiao, X., Guo, H., Wang, P., Tang, Y., Ying, Q., Zhao, X., Deng, W., and Zhang, H.: Fine Particulate Matter and Ozone Pollution in the 18 Cities of the Sichuan Basin in Southwestern China: Model Performance and Characteristics, *Aerosol and Air Quality Research*, 19, 2308-2319, <https://doi.org/10.4209/aaqr.2019.05.0235>, 2019.
- Qiao, X., Wang, P., Zhang, J., Zhang, H., Tang, Y., Hu, J., and Ying, Q.: Spatial-temporal variations and source contributions to forest ozone exposure in China, *Science of the Total Environment*, 674, 189-199, <https://doi.org/10.1016/j.scitotenv.2019.04.106>, 2019.
- Qin, M., Wang, X., Hu, Y., Huang, X., He, L., Zhong, L., Song, Y., Hu, M., and Zhang, Y.: Formation of particulate sulfate and nitrate over the Pearl River Delta in the fall: Diagnostic analysis using the Community Multiscale Air Quality model, *Atmospheric Environment*, 112, 81-89, <https://doi.org/10.1016/j.atmosenv.2015.04.027>, 2015.
- Qiu, X., Duan, L., Cai, S., Yu, Q., Wang, S., Chai, F., Gao, J., Li, Y., and Xu, Z.: Effect of current emission abatement strategies on air quality improvement in China: A case study of Baotou, a typical industrial city in Inner Mongolia, *Journal of Environmental Sciences*, 57, 383-390, <https://doi.org/10.1016/j.jes.2016.12.014>, 2017.
- Qiu, X., Ying, Q., Wang, S., Duan, L., Zhao, J., Xing, J., Ding, D., Sun, Y., Liu, B., Shi, A., Yan, X., Xu, Q., and Hao, J.: Modeling the impact of heterogeneous reactions of chlorine on summertime nitrate formation in Beijing, China, *Atmospheric Chemistry and Physics*, 19, 6737-6747, <https://doi.org/10.5194/acp-19-6737-2019>, 2019.
- Qiu, Y., Liao, H., Zhang, R., and Hu, J.: Simulated impacts of direct radiative effects of scattering and absorbing aerosols on surface layer aerosol concentrations in China during a heavily polluted event in February 2014, *Journal of Geophysical Research: Atmospheres*, 122, 5955-5975, <https://doi.org/10.1002/2016jd026309>, 2017.

- Qiu, Y., Ma, Z., and Li, K.: A modeling study of the peroxyacetyl nitrate (PAN) during a wintertime haze event in Beijing, China, *Science of the Total Environment*, 650, 1944-1953, <https://doi.org/10.1016/j.scitotenv.2018.09.253>, 2019.
- Qu, Y., An, J., Li, J., Chen, Y., Li, Y., Liu, X., and Hu, M.: Effects of NO<sub>x</sub> and VOCs from five emission sources on summer surface O<sub>3</sub> over the Beijing-Tianjin-Hebei region, *Advances in Atmospheric Sciences*, 31, 787-800, <https://doi.org/10.1007/s00376-013-3132-x>, 2014.
- Qu, Y., Chen, Y., Liu, X., Zhang, J., Guo, Y., and An, J.: Seasonal effects of additional HONO sources and the heterogeneous reactions of N<sub>2</sub>O<sub>5</sub> on nitrate in the North China Plain, *Science of the Total Environment*, 690, 97-107, <https://doi.org/10.1016/j.scitotenv.2019.06.436>, 2019.
- Quan, J., and Zhang, X.: Assessing the role of ammonia in sulfur transformation and deposition in China, *Atmospheric Research*, 88, 78-88, <https://doi.org/10.1016/j.atmosres.2007.10.006>, 2008.
- Reddington, C. L., Conibear, L., Knute, C., Silver, B. J., Li, Y. J., Chan, C. K., Arnold, S. R., and Spracklen, D. V.: Exploring the impacts of anthropogenic emission sectors on PM<sub>2.5</sub> and human health in South and East Asia, *Atmospheric Chemistry and Physics*, 19, 11887-11910, <https://doi.org/10.5194/acp-19-11887-2019>, 2019.
- Sekiguchi, A., Shimadera, H., and Kondo, A.: Impact of Aerosol Direct Effect on Wintertime PM<sub>2.5</sub> Simulated by an Online Coupled Meteorology-Air Quality Model over East Asia, *Aerosol and Air Quality Research*, 18, 1068-1079, <https://doi.org/10.4209/aaqr.2016.06.0282>, 2018.
- Sha, T., Ma, X., Jia, H., Tian, R., Chang, Y., Cao, F., and Zhang, Y.: Aerosol chemical component: Simulations with WRF-Chem and comparison with observations in Nanjing, *Atmospheric Environment*, 218, <https://doi.org/10.1016/j.atmosenv.2019.116982>, 2019a.
- Sha, T., Ma, X., Jia, H., van der A, R. J., Ding, J., Zhang, Y., and Chang, Y.: Exploring the influence of two inventories on simulated air pollutants during winter over the Yangtze River Delta, *Atmospheric Environment*, 206, 170-182, <https://doi.org/10.1016/j.atmosenv.2019.03.006>, 2019b.
- Shi, C., Fernando, H. J. S., Wang, Z., An, X., and Wu, Q.: Tropospheric NO<sub>2</sub> columns over East Central China: Comparisons between SCIAMACHY measurements and nested CMAQ simulations, *Atmospheric Environment*, 42, 7165-7173, <https://doi.org/10.1016/j.atmosenv.2008.05.046>, 2008.
- Shi, Z., Li, J., Huang, L., Wang, P., Wu, L., Ying, Q., Zhang, H., Lu, L., Liu, X., Liao, H., and Hu, J.: Source apportionment of fine particulate matter in China in 2013 using a source-oriented chemical transport model, *Science of the Total Environment*, 601-602, 1476-1487, <https://doi.org/10.1016/j.scitotenv.2017.06.019>, 2017.
- Shimadera, H., Hayami, H., Ohara, T., Morino, Y., Takami, A., and Irei, S.: Numerical Simulation of Extreme Air Pollution by Fine Particulate Matter in China in Winter 2013, *Asian Journal of Atmospheric Environment*, 8, 25-34, <https://doi.org/10.5572/ajae.2014.8.1.025>, 2014.
- Shu, L., Xie, M., Wang, T., Gao, D., Chen, P., Han, Y., Li, S., Zhuang, B., and Li, M.: Integrated studies of a regional ozone pollution synthetically affected by subtropical high and typhoon system in the

- Yangtze River Delta region, China, *Atmospheric Chemistry and Physics*, 16, 15801-15819, <https://doi.org/10.5194/acp-16-15801-2016>, 2016.
- Song, C. H., Park, M. E., Lee, K. H., Ahn, H. J., Lee, Y., Kim, J. Y., Han, K. M., Kim, J., Ghim, Y. S., and Kim, Y. J.: An investigation into seasonal and regional aerosol characteristics in East Asia using model-predicted and remotely-sensed aerosol properties, *Atmospheric Chemistry and Physics*, 8, 8661-8713, <https://doi.org/10.5194/acp-8-6627-2008>, 2008.
- Sun, L., Xue, L., Wang, Y., Li, L., Lin, J., Ni, R., Yan, Y., Chen, L., Li, J., Zhang, Q., and Wang, W.: Impacts of meteorology and emissions on summertime surface ozone increases over central eastern China between 2003 and 2015, *Atmospheric Chemistry and Physics*, 19, 1455-1469, <https://doi.org/10.5194/acp-19-1455-2019>, 2019.
- Sun, X., Cheng, S., Li, J., and Wen, W.: An Integrated Air Quality Model and Optimization Model for Regional Economic and Environmental Development: A Case Study of Tangshan, China, *Aerosol and Air Quality Research*, 17, 1592-1609, <https://doi.org/10.4209/aaqr.2016.09.0418>, 2017.
- Sun, X., Cheng, S., Lang, J., Ren, Z., and Sun, C.: Development of emissions inventory and identification of sources for priority control in the middle reaches of Yangtze River Urban Agglomerations, *Science of the Total Environment*, 625, 155-167, <https://doi.org/10.1016/j.scitotenv.2017.12.103>, 2018.
- Tang, X., Zhu, J., Wang, Z. F., Wang, M., Gbaguidi, A., Li, J., Shao, M., Tang, G. Q., and Ji, D. S.: Inversion of CO emissions over Beijing and its surrounding areas with ensemble Kalman filter, *Atmospheric Environment*, 81, 676-686, <https://doi.org/10.1016/j.atmosenv.2013.08.051>, 2013.
- Tang, Y., An, J., Li, Y., and Wang, F.: Uncertainty in the uptake coefficient for HONO formation on soot and its impacts on concentrations of major chemical components in the Beijing–Tianjin–Hebei region, *Atmospheric Environment*, 84, 163-171, <https://doi.org/10.1016/j.atmosenv.2013.11.034>, 2014.
- Tang, Y., An, J., Wang, F., Li, Y., Qu, Y., Chen, Y., and Lin, J.: Impacts of an unknown daytime HONO source on the mixing ratio and budget of HONO, and hydroxyl, hydroperoxyl, and organic peroxy radicals, in the coastal regions of China, *Atmospheric Chemistry and Physics*, 15, 9381-9398, <https://doi.org/10.5194/acp-15-9381-2015>, 2015.
- Tao, H., Xing, J., Zhou, H., Chang, X., Li, G., Chen, L., and Li, J.: Impacts of land use and land cover change on regional meteorology and air quality over the Beijing-Tianjin-Hebei region, China, *Atmospheric Environment*, 189, 9-21, <https://doi.org/10.1016/j.atmosenv.2018.06.033>, 2018.
- Tao, W., Liu, J., Ban-Weiss, G. A., Hauglustaine, D. A., Zhang, L., Zhang, Q., Cheng, Y., Yu, Y., and Tao, S.: Effects of urban land expansion on the regional meteorology and air quality of eastern China, *Atmospheric Chemistry and Physics*, 15, 8597-8614, <https://doi.org/10.5194/acp-15-8597-2015>, 2015.
- Tie, X., Geng, F., Guenther, A., Cao, J., Greenberg, J., Zhang, R., Apel, E., Li, G., Weinheimer, A., Chen, J., and Cai, C.: Megacity impacts on regional ozone formation: observations and WRF-Chem

- modeling for the MIRAGE-Shanghai field campaign, *Atmospheric Chemistry and Physics*, 13, 5655-5669, <https://doi.org/10.5194/acp-13-5655-2013>, 2013.
- Wang, D., Hu, J., Xu, Y., Lv, D., Xie, X., Kleeman, M., Xing, J., Zhang, H., and Ying, Q.: Source contributions to primary and secondary inorganic particulate matter during a severe wintertime PM<sub>2.5</sub> pollution episode in Xi'an, China, *Atmospheric Environment*, 97, 182-194, <https://doi.org/10.1016/j.atmosenv.2014.08.020>, 2014.
- Wang, F., An, J., Li, Y., Tang, Y., Lin, J., Qu, Y., Chen, Y., Zhang, B., and Zhai, J.: Impacts of uncertainty in AVOC emissions on the summer ROx budget and ozone production rate in the three most rapidly-developing economic growth regions of China, *Advances in Atmospheric Sciences*, 31, 1331-1342, <https://doi.org/10.1007/s00376-014-3251-z>, 2014.
- Wang, G., Cheng, S., Wei, W., Yang, X., Wang, X., Jia, J., Lang, J., and Lv, Z.: Characteristics and emission-reduction measures evaluation of PM<sub>2.5</sub> during the two major events: APEC and Parade, *Science of the Total Environment*, 595, 81-92, <https://doi.org/10.1016/j.scitotenv.2017.03.231>, 2017.
- Wang, H., Sui, W., Tang, X., Lu, M., Wu, H., Kong, L., Han, L., Wu, L., Wang, W., and Wang, Z.: Simulation-based Design of Regional Emission Control Experiments with Simultaneous Pollution of O<sub>3</sub> and PM<sub>2.5</sub> in Jinan, China, *Aerosol and Air Quality Research*, 19, 2543-2556, <https://doi.org/10.4209/aaqr.2019.03.0125>, 2019.
- Wang, J., Allen, D. J., Pickering, K. E., Li, Z., and He, H.: Impact of aerosol direct effect on East Asian air quality during the EAST-AIRE campaign, *Journal of Geophysical Research: Atmospheres*, 121, 6534-6554, <https://doi.org/10.1002/2016jd025108>, 2016a.
- Wang, J., Xu, J., He, Y., Chen, Y., and Meng, F.: Long range transport of nitrate in the low atmosphere over Northeast Asia, *Atmospheric Environment*, 144, 315-324, <https://doi.org/10.1016/j.atmosenv.2016.08.084>, 2016b.
- Wang, J., Mo, J., Li, J., Ling, Z., Huang, T., Zhao, Y., Zhang, X., Mao, X., Gao, H., Shen, Y., and Ma, J.: OMI-measured SO<sub>2</sub> in a large-scale national energy industrial base and its effect on the capital city of Xinjiang, Northwest China, *Atmospheric Environment*, 167, 159-169, <https://doi.org/10.1016/j.atmosenv.2017.08.002>, 2017.
- Wang, L., Jang, C., Zhang, Y., Wang, K., Zhang, Q., Streets, D., Fu, J., Lei, Y., Schreifels, J., He, K., Hao, J., Lam, Y.-F., Lin, J., Meskhidze, N., Voorhees, S., Evarts, D., and Phillips, S.: Assessment of air quality benefits from national air pollution control policies in China. Part II: Evaluation of air quality predictions and air quality benefits assessment, *Atmospheric Environment*, 44, 3449-3457, <https://doi.org/10.1016/j.atmosenv.2010.05.058>, 2010.
- Wang, L., Xu, J., Yang, J., Zhao, X., Wei, W., Cheng, D., Pan, X., and Su, J.: Understanding haze pollution over the southern Hebei area of China using the CMAQ model, *Atmospheric Environment*, 56, 69-79, <https://doi.org/10.1016/j.atmosenv.2012.04.013>, 2012.

- Wang, L., Wei, Z., Wei, W., Fu, J. S., Meng, C., and Ma, S.: Source apportionment of PM<sub>2.5</sub> in top polluted cities in Hebei, China using the CMAQ model, *Atmospheric Environment*, 122, 723-736, <https://doi.org/10.1016/j.atmosenv.2015.10.041>, 2015.
- Wang, L., Zhang, Y., Wang, K., Zheng, B., Zhang, Q., and Wei, W.: Application of Weather Research and Forecasting Model with Chemistry (WRF/Chem) over northern China: Sensitivity study, comparative evaluation, and policy implications, *Atmospheric Environment*, 124, 337-350, <https://doi.org/10.1016/j.atmosenv.2014.12.052>, 2016.
- Wang, L. T., Wei, Z., Yang, J., Zhang, Y., Zhang, F. F., Su, J., Meng, C. C., and Zhang, Q.: The 2013 severe haze over southern Hebei, China: model evaluation, source apportionment, and policy implications, *Atmospheric Chemistry and Physics*, 14, 3151-3173, <https://doi.org/10.5194/acp-14-3151-2014>, 2014.
- Wang, N., Guo, H., Jiang, F., Ling, Z. H., and Wang, T.: Simulation of ozone formation at different elevations in mountainous area of Hong Kong using WRF-CMAQ model, *Science of the Total Environment*, 505, 939-951, <https://doi.org/10.1016/j.scitotenv.2014.10.070>, 2015.
- Wang, N., Lyu, X. P., Deng, X. J., Guo, H., Deng, T., Li, Y., Yin, C. Q., Li, F., and Wang, S. Q.: Assessment of regional air quality resulting from emission control in the Pearl River Delta region, southern China, *Science of the Total Environment*, 573, 1554-1565, <https://doi.org/10.1016/j.scitotenv.2016.09.013>, 2016.
- Wang, P., Chen, Y., Hu, J., Zhang, H., and Ying, Q.: Source apportionment of summertime ozone in China using a source-oriented chemical transport model, *Atmospheric Environment*, 211, 79-90, <https://doi.org/10.1016/j.atmosenv.2019.05.006>, 2019.
- Wang, Q., Liu, S., Li, N., Dai, W., Wu, Y., Tian, J., Zhou, Y., Wang, M., Ho, S. S. H., Chen, Y., Zhang, R., Zhao, S., Zhu, C., Han, Y., Tie, X., and Cao, J.: Impacts of short-term mitigation measures on PM<sub>2.5</sub> and radiative effects: a case study at a regional background site near Beijing, China, *Atmospheric Chemistry and Physics*, 19, 1881-1899, <https://doi.org/10.5194/acp-19-1881-2019>, 2019a.
- Wang, Q., Luo, K., Fan, J., Gao, X., and Cen, K.: Spatial Distribution and Multiscale Transport Characteristics of PM<sub>2.5</sub> in China, *Aerosol and Air Quality Research*, 19, 1993-2007, <https://doi.org/10.4209/aaqr.2019.04.0202>, 2019b.
- Wang, S., Zhao, M., Xing, J., Wu, Y., Zhou, Y., Lei, Y., He, K., Fu, L., and Hao, J.: Quantifying the Air Pollutants Emission Reduction during the 2008 Olympic Games in Beijing, *Environmental Science & Technology*, 44, 2490-2496, <https://doi.org/10.1021/es9028167>, 2010.
- Wang, S., Xing, J., Chatani, S., Hao, J., Klimont, Z., Cofala, J., and Amann, M.: Verification of anthropogenic emissions of China by satellite and ground observations, *Atmospheric Environment*, 45, 6347-6358, <https://doi.org/10.1016/j.atmosenv.2011.08.054>, 2011a.
- Wang, S., Zheng, J., Fu, F., Yin, S., and Zhong, L.: Development of an emission processing system for the Pearl River Delta Regional air quality modeling using the SMOKE model: Methodology and

- evaluation, *Atmospheric Environment*, 45, 5079-5089, <https://doi.org/10.1016/j.atmosenv.2011.06.037>, 2011b.
- Wang, T., Jiang, F., Deng, J., Shen, Y., Fu, Q., Wang, Q., Fu, Y., Xu, J., and Zhang, D.: Urban air quality and regional haze weather forecast for Yangtze River Delta region, *Atmospheric Environment*, 58, 70-83, <https://doi.org/10.1016/j.atmosenv.2012.01.014>, 2012.
- Wang, X., Liang, X.-Z., Jiang, W., Tao, Z., Wang, J. X. L., Liu, H., Han, Z., Liu, S., Zhang, Y., and Grell, G. A.: WRF-Chem simulation of East Asian air quality: Sensitivity to temporal and vertical emissions distributions, *Atmospheric Environment*, 44, 660-669, <https://doi.org/10.1016/j.atmosenv.2009.11.011>, 2010a.
- Wang, X., Zhang, Y., Hu, Y., Zhou, W., Lu, K., Zhong, L., Zeng, L., Shao, M., Hu, M., and Russell, A. G.: Process analysis and sensitivity study of regional ozone formation over the Pearl River Delta, China, during the PRIDE-PRD2004 campaign using the Community Multiscale Air Quality modeling system, *Atmospheric Chemistry and Physics*, 10, 4423-4437, <https://doi.org/10.5194/acp-10-4423-2010>, 2010b.
- Wang, X., Zhang, Y., Hu, Y., Zhou, W., Zeng, L., Hu, M., Cohan, D. S., and Russell, A. G.: Decoupled direct sensitivity analysis of regional ozone pollution over the Pearl River Delta during the PRIDE-PRD2004 campaign, *Atmospheric Environment*, 45, 4941-4949, <https://doi.org/10.1016/j.atmosenv.2011.06.006>, 2011.
- Wang, X., Lin, C.-J., Feng, X., Yuan, W., Fu, X., Zhang, H., Wu, Q., and Wang, S.: Assessment of Regional Mercury Deposition and Emission Outflow in Mainland China, *Journal of Geophysical Research: Atmospheres*, 123, 9868–9890, <https://doi.org/10.1029/2018JD028350>, 2018a.
- Wang, X., Wei, W., Cheng, S., Li, J., Zhang, H., and Lv, Z.: Characteristics and classification of PM<sub>2.5</sub> pollution episodes in Beijing from 2013 to 2015, *Science of the Total Environment*, 612, 170-179, <https://doi.org/10.1016/j.scitotenv.2017.08.206>, 2018b.
- Wang, X., Wei, W., Cheng, S., Zhang, C., and Duan, W.: A monitoring-modeling approach to SO<sub>4</sub><sup>2-</sup> and NO<sub>3</sub><sup>-</sup> secondary conversion ratio estimation during haze periods in Beijing, China, *Journal of Environmental Sciences*, 78, 293-302, <https://doi.org/10.1016/j.jes.2018.11.002>, 2019a.
- Wang, X., Wei, W., Cheng, S., Zhang, H., and Yao, S.: Source estimation of SO<sub>4</sub><sup>2-</sup> and NO<sub>3</sub><sup>-</sup> based on monitoring-modeling approach during winter and summer seasons in Beijing and Tangshan, China, *Atmospheric Environment*, 214, <https://doi.org/10.1016/j.atmosenv.2019.116849>, 2019b.
- Wang, Y., Zhang, Q., Jiang, J., Zhou, W., Wang, B., He, K., Duan, F., Zhang, Q., Philip, S., and Xie, Y.: Enhanced sulfate formation during China's severe winter haze episode in January 2013 missing from current models, *Journal of Geophysical Research: Atmospheres*, 119, 40425-410,440, <https://doi.org/10.1002/2013jd021426>, 2014.
- Wang, Y., Bao, S., Wang, S., Hu, Y., Shi, X., Wang, J., Zhao, B., Jiang, J., Zheng, M., Wu, M., Russell, A. G., Wang, Y., and Hao, J.: Local and regional contributions to fine particulate matter in Beijing

- during heavy haze episodes, *Science of the Total Environment*, 580, 283-296, <https://doi.org/10.1016/j.scitotenv.2016.12.127>, 2017.
- Wang, Z., Pan, L., Li, Y., Zhang, D., Ma, J., Sun, F., Xu, W., and Wang, X.: Assessment of air quality benefits from the national pollution control policy of thermal power plants in China: A numerical simulation, *Atmospheric Environment*, 106, 288-304, <https://doi.org/10.1016/j.atmosenv.2015.01.022>, 2015.
- Wang, Z., Zhang, D., Li, X., Li, Y., Chen, T., Liu, B., Li, L., Nie, T., and Pan, L.: Multi-Method Observation and Numerical Simulation of a PM<sub>2.5</sub> Pollution Episode in Beijing in October, 2014, *Aerosol and Air Quality Research*, 16, 1403-1415, <https://doi.org/10.4209/aaqr.2015.09.0532>, 2016.
- Wang, Z., Itahashi, S., Uno, I., Pan, X., Osada, K., Yamamoto, S., Nishizawa, T., Tamura, K., and Wang, Z.: Modeling the Long-Range Transport of Particulate Matters for January in East Asia using NAQPMS and CMAQ, *Aerosol and Air Quality Research*, 17, 3064-3078, <https://doi.org/10.4209/aaqr.2016.12.0534>, 2017.
- Wang, Z., Pan, X., Uno, I., Chen, X., Yamamoto, S., Zheng, H., Li, J., and Wang, Z.: Importance of mineral dust and anthropogenic pollutants mixing during a long-lasting high PM event over East Asia, *Environmental Pollution*, 234, 368-378, <https://doi.org/10.1016/j.envpol.2017.11.068>, 2018.
- Wei, W., Li, Y., Wang, Y., Cheng, S., and Wang, L.: Characteristics of VOCs during haze and non-haze days in Beijing, China: Concentration, chemical degradation and regional transport impact, *Atmospheric Environment*, 194, 134-145, <https://doi.org/10.1016/j.atmosenv.2018.09.037>, 2018a.
- Wei, W., Lv, Z. F., Li, Y., Wang, L. T., Cheng, S., and Liu, H.: A WRF-Chem model study of the impact of VOCs emission of a huge petro-chemical industrial zone on the summertime ozone in Beijing, China, *Atmospheric Environment*, 175, 44-53, <https://doi.org/10.1016/j.atmosenv.2017.11.058>, 2018b.
- Wei, W., Li, Y., Ren, Y., Cheng, S., and Han, L.: Sensitivity of summer ozone to precursor emission change over Beijing during 2010–2015: A WRF-Chem modeling study, *Atmospheric Environment*, 218, <https://doi.org/10.1016/j.atmosenv.2019.116984>, 2019.
- Wu, D., Fung, J. C. H., Yao, T., and Lau, A. K. H.: A study of control policy in the Pearl River Delta region by using the particulate matter source apportionment method, *Atmospheric Environment*, 76, 147-161, <https://doi.org/10.1016/j.atmosenv.2012.11.069>, 2013.
- Wu, J., Li, G., Cao, J., Bei, N., Wang, Y., Feng, T., Huang, R., Liu, S., Zhang, Q., and Tie, X.: Contributions of trans-boundary transport to summertime air quality in Beijing, China, *Atmospheric Chemistry and Physics*, 17, 2035-2051, <https://doi.org/10.5194/acp-17-2035-2017>, 2017a.
- Wu, J., Bei, N., Li, X., Cao, J., Feng, T., Wang, Y., Tie, X., and Li, G.: Widespread air pollutants of the North China Plain during the Asian summer monsoon season: a case study, *Atmospheric Chemistry and Physics*, 18, 8491-8504, <https://doi.org/10.5194/acp-18-8491-2018>, 2018.



- Wu, J. B., Wang, Z., Wang, Q., Li, J., Xu, J., Chen, H., Ge, B., Zhou, G., and Chang, L.: Development of an on-line source-tagged model for sulfate, nitrate and ammonium: A modeling study for highly polluted periods in Shanghai, China, *Environmental Pollution*, 221, 168-179, <https://doi.org/10.1016/j.envpol.2016.11.061>, 2017b.
- Wu, Q. Z., Wang, Z. F., Gbaguidi, A., Gao, C., Li, L. N., and Wang, W.: A numerical study of contributions to air pollution in Beijing during CAREBeijing-2006, *Atmospheric Chemistry and Physics*, 11, 5997-6011, <https://doi.org/10.5194/acp-11-5997-2011>, 2011.
- Xie, M., Liao, J., Wang, T., Zhu, K., Zhuang, B., Han, Y., Li, M., and Li, S.: Modeling of the anthropogenic heat flux and its effect on regional meteorology and air quality over the Yangtze River Delta region, China, *Atmospheric Chemistry and Physics*, 16, 6071-6089, <https://doi.org/10.5194/acp-16-6071-2016>, 2016a.
- Xie, M., Zhu, K., Wang, T., Feng, W., Gao, D., Li, M., Li, S., Zhuang, B., Han, Y., Chen, P., and Liao, J.: Changes in regional meteorology induced by anthropogenic heat and their impacts on air quality in South China, *Atmospheric Chemistry and Physics*, 16, 15011-15031, <https://doi.org/10.5194/acp-16-15011-2016>, 2016b.
- Xing, J., Wang, S. X., Jang, C., Zhu, Y., and Hao, J. M.: Nonlinear response of ozone to precursor emission changes in China: a modeling study using response surface methodology, *Atmospheric Chemistry and Physics*, 11, 5027-5044, <https://doi.org/10.5194/acp-11-5027-2011>, 2011a.
- Xing, J., Zhang, Y., Wang, S., Liu, X., Cheng, S., Zhang, Q., Chen, Y., Streets, D. G., Jang, C., Hao, J., and Wang, W.: Modeling study on the air quality impacts from emission reductions and atypical meteorological conditions during the 2008 Beijing Olympics, *Atmospheric Environment*, 45, 1786-1798, <https://doi.org/10.1016/j.atmosenv.2011.01.025>, 2011b.
- Xing, J., Mathur, R., Pleim, J., Hogrefe, C., Gan, C. M., Wong, D. C., Wei, C., Gilliam, R., and Pouliot, G.: Observations and modeling of air quality trends over 1990–2010 across the Northern Hemisphere: China, the United States and Europe, *Atmospheric Chemistry and Physics*, 15, 2723-2747, <https://doi.org/10.5194/acp-15-2723-2015>, 2015.
- Xing, J., Wang, J., Mathur, R., Wang, S., Sarwar, G., Pleim, J., Hogrefe, C., Zhang, Y., Jiang, J., Wong, D. C., and Hao, J.: Impacts of aerosol direct effects on tropospheric ozone through changes in atmospheric dynamics and photolysis rates, *Atmospheric Chemistry and Physics*, 17, 9869-9883, <https://doi.org/10.5194/acp-17-9869-2017>, 2017.
- Xing, L., Wu, J., Elser, M., Tong, S., Liu, S., Li, X., Liu, L., Cao, J., Zhou, J., El-Haddad, I., Huang, R., Ge, M., Tie, X., Prévôt, A. S. H., and Li, G.: Wintertime secondary organic aerosol formation in Beijing–Tianjin–Hebei (BTH): contributions of HONO sources and heterogeneous reactions, *Atmospheric Chemistry and Physics*, 19, 2343-2359, <https://doi.org/10.5194/acp-19-2343-2019>, 2019.

- Xu, J., Chang, L., Qu, Y., Yan, F., Wang, F., and Fu, Q.: The meteorological modulation on PM<sub>2.5</sub> interannual oscillation during 2013 to 2015 in Shanghai, China, *Science of the Total Environment*, 572, 1138-1149, <https://doi.org/10.1016/j.scitotenv.2016.08.024>, 2016.
- Xu, J., Tie, X., Gao, W., Lin, Y., and Fu, Q.: Measurement and model analyses of the ozone variation during 2006 to 2015 and its response to emission change in megacity Shanghai, China, *Atmospheric Chemistry and Physics*, 19, 9017-9035, <https://doi.org/10.5194/acp-19-9017-2019>, 2019.
- Xu, J. W., Martin, R. V., van Donkelaar, A., Kim, J., Choi, M., Zhang, Q., Geng, G., Liu, Y., Ma, Z., Huang, L., Wang, Y., Chen, H., Che, H., Lin, P., and Lin, N.: Estimating ground-level PM<sub>2.5</sub> in eastern China using aerosol optical depth determined from the GOCI satellite instrument, *Atmospheric Chemistry and Physics*, 15, 13133-13144, <https://doi.org/10.5194/acp-15-13133-2015>, 2015.
- Xu, Y., Xue, W., Lei, Y., Zhao, Y., Cheng, S., Ren, Z., and Huang, Q.: Impact of Meteorological Conditions on PM<sub>2.5</sub> Pollution in China during Winter, *Atmosphere*, 9, <https://doi.org/10.3390/atmos9110429>, 2018.
- Xu, Z., Liu, M., Zhang, M., Song, Y., Wang, S., Zhang, L., Xu, T., Wang, T., Yan, C., Zhou, T., Sun, Y., Pan, Y., Hu, M., Zheng, M., and Zhu, T.: High efficiency of livestock ammonia emission controls in alleviating particulate nitrate during a severe winter haze episode in northern China, *Atmospheric Chemistry and Physics*, 19, 5605-5613, <https://doi.org/10.5194/acp-19-5605-2019>, 2019.
- Xue, W., Wang, J., Niu, H., Yang, J., Han, B., Lei, Y., Chen, H., and Jiang, C.: Assessment of air quality improvement effect under the National Total Emission Control Program during the Twelfth National Five-Year Plan in China, *Atmospheric Environment*, 68, 74-81, <https://doi.org/10.1016/j.atmosenv.2012.11.053>, 2013.
- Xue, Y., Zhou, Z., Nie, T., Wang, K., Nie, L., Pan, T., Wu, X., Tian, H., Zhong, L., Li, J., Liu, H., Liu, S., and Shao, P.: Trends of multiple air pollutants emissions from residential coal combustion in Beijing and its implication on improving air quality for control measures, *Atmospheric Environment*, 142, 303-312, <https://doi.org/10.1016/j.atmosenv.2016.08.004>, 2016.
- Yamaji, K., Li, J., Uno, I., Kanaya, Y., Irie, H., Takigawa, M., Komazaki, Y., Pochanart, P., Liu, Y., Tanimoto, H., Ohara, T., Yan, X., Wang, Z., and Akimoto, H.: Impact of open crop residual burning on air quality over Central Eastern China during the Mount Tai Experiment 2006 (MTX2006), *Atmospheric Chemistry and Physics*, 10, 7353-7368, <https://doi.org/10.5194/acp-10-7353-2010>, 2010.
- Yang, J., Kang, S., Chen, D., Ji, Z., Tripathee, L., Chen, X., Du, W., and Qiu, G.: Quantifying the contributions of various emission sources to black carbon and assessment of control strategies in western China, *Atmospheric Research*, 215, 178-192, <https://doi.org/10.1016/j.atmosres.2018.09.003>, 2019.

- Yang, W., Chen, H., Wang, W., Wu, J., Li, J., Wang, Z., Zheng, J., and Chen, D.: Modeling study of ozone source apportionment over the Pearl River Delta in 2015, *Environmental Pollution*, 253, 393-402, <https://doi.org/10.1016/j.envpol.2019.06.091>, 2019a.
- Yang, W., Li, J., Wang, W., Li, J., Ge, M., Sun, Y., Chen, X., Ge, B., Tong, S., Wang, Q., and Wang, Z.: Investigating secondary organic aerosol formation pathways in China during 2014, *Atmospheric Environment*, 213, 133-147, <https://doi.org/10.1016/j.atmosenv.2019.05.057>, 2019b.
- Yang, X., Cheng, S., Lang, J., Xu, R., and Lv, Z.: Characterization of aircraft emissions and air quality impacts of an international airport, *Journal of Environmental Sciences*, 72, 198-207, <https://doi.org/10.1016/j.jes.2018.01.007>, 2018a.
- Yang, X., Cheng, S., Wang, G., Xu, R., Wang, X., Zhang, H., and Chen, G.: Characterization of volatile organic compounds and the impacts on the regional ozone at an international airport, *Environmental Pollution*, 238, 491-499, <https://doi.org/10.1016/j.envpol.2018.03.073>, 2018b.
- Yang, X., Wu, Q., Zhao, R., Cheng, H., He, H., Ma, Q., Wang, L., and Luo, H.: New method for evaluating winter air quality: PM<sub>2.5</sub> assessment using Community Multi-Scale Air Quality Modeling (CMAQ) in Xi'an, *Atmospheric Environment*, 211, 18-28, <https://doi.org/10.1016/j.atmosenv.2019.04.019>, 2019.
- Yang, Y., Liao, H., and Lou, S.: Decadal trend and interannual variation of outflow of aerosols from East Asia: Roles of variations in meteorological parameters and emissions, *Atmospheric Environment*, 100, 141-153, <https://doi.org/10.1016/j.atmosenv.2014.11.004>, 2015.
- Yao, H., Song, Y., Liu, M., Archer-Nicholls, S., Lowe, D., McFiggans, G., Xu, T., Du, P., Li, J., Wu, Y., Hu, M., Zhao, C., and Zhu, T.: Direct radiative effect of carbonaceous aerosols from crop residue burning during the summer harvest season in East China, *Atmospheric Chemistry and Physics*, 17, 5205-5219, <https://doi.org/10.5194/acp-17-5205-2017>, 2017.
- Yao, T., Fung, J. C. H., Ma, H., Lau, A. K. H., Chan, P. W., Yu, J. Z., and Xue, J.: Enhancement in secondary particulate matter production due to mountain trapping, *Atmospheric Research*, 147-148, 227-236, <https://doi.org/10.1016/j.atmosres.2014.05.007>, 2014.
- Ye, Z., Guo, X., Cheng, L., Cheng, S., Chen, D., Wang, W., and Liu, B.: Reducing PM<sub>2.5</sub> and secondary inorganic aerosols by agricultural ammonia emission mitigation within the Beijing-Tianjin-Hebei region, China, *Atmospheric Environment*, 219, <https://doi.org/10.1016/j.atmosenv.2019.116989>, 2019.
- Yin, S., Huang, Z., Zheng, J., Huang, X., Chen, D., and Tan, H.: Characteristics of inorganic aerosol formation over ammonia-poor and ammonia-rich areas in the Pearl River Delta region, China, *Atmospheric Environment*, 177, 120-131, <https://doi.org/10.1016/j.atmosenv.2018.01.005>, 2018.
- Yin, X., Huang, Z., Zheng, J., Yuan, Z., Zhu, W., Huang, X., and Chen, D.: Source contributions to PM<sub>2.5</sub> in Guangdong province, China by numerical modeling: Results and implications, *Atmospheric Research*, 186, 63-71, <https://doi.org/10.1016/j.atmosres.2016.11.007>, 2017.

- Ying, Q., Wu, L., and Zhang, H.: Local and inter-regional contributions to PM<sub>2.5</sub> nitrate and sulfate in China, *Atmospheric Environment*, 94, 582-592, <https://doi.org/10.1016/j.atmosenv.2014.05.078>, 2014.
- Ying, Q., Feng, M., Song, D., Wu, L., Hu, J., Zhang, H., Kleeman, M. J., and Li, X.: Improve regional distribution and source apportionment of PM<sub>2.5</sub> trace elements in China using inventory-observation constrained emission factors, *Science of the Total Environment*, 624, 355-365, <https://doi.org/10.1016/j.scitotenv.2017.12.138>, 2018.
- Yu, H., Dai, W., Ren, L., Liu, D., Yan, X., Xiao, H., He, J., and Xu, H.: The Effect of Emission Control on the Submicron Particulate Matter Size Distribution in Hangzhou during the 2016 G20 Summit, *Aerosol and Air Quality Research*, 18, 2038-2046, <https://doi.org/10.4209/aaqr.2018.01.0014>, 2018.
- Yu, M., Carmichael, G. R., Zhu, T., and Cheng, Y.: Sensitivity of predicted pollutant levels to urbanization in China, *Atmospheric Environment*, 60, 544-554, <https://doi.org/10.1016/j.atmosenv.2012.06.075>, 2012.
- Yu, M., Carmichael, G. R., Zhu, T., and Cheng, Y.: Sensitivity of predicted pollutant levels to anthropogenic heat emissions in Beijing, *Atmospheric Environment*, 89, 169-178, <https://doi.org/10.1016/j.atmosenv.2014.01.034>, 2014.
- Zeren, Y., Guo, H., Lyu, X., Jiang, F., Wang, Y., Liu, X., Zeng, L., Li, M., and Li, L.: An Ozone “Pool” in South China: Investigations on Atmospheric Dynamics and Photochemical Processes Over the Pearl River Estuary, *Journal of Geophysical Research: Atmospheres*, 124, 12340-12355, <https://doi.org/10.1029/2019jd030833>, 2019.
- Zhai, S., An, X., Liu, Z., Sun, Z., and Hou, Q.: Model assessment of atmospheric pollution control schemes for critical emission regions, *Atmospheric Environment*, 124, 367-377, <https://doi.org/10.1016/j.atmosenv.2015.08.093>, 2016.
- Zhang, B., Wang, Y., and Hao, J.: Simulating aerosol–radiation–cloud feedbacks on meteorology and air quality over eastern China under severe haze conditions in winter, *Atmospheric Chemistry and Physics*, 15, 2387-2404, <https://doi.org/10.5194/acp-15-2387-2015>, 2015.
- Zhang, G., Gao, Y., Cai, W., Leung, L. R., Wang, S., Zhao, B., Wang, M., Shan, H., Yao, X., and Gao, H.: Seesaw haze pollution in North China modulated by the sub-seasonal variability of atmospheric circulation, *Atmospheric Chemistry and Physics*, 19, 565-576, <https://doi.org/10.5194/acp-19-565-2019>, 2019.
- Zhang, H., Cheng, S., Wang, X., Yao, S., and Zhu, F.: Continuous monitoring, compositions analysis and the implication of regional transport for submicron and fine aerosols in Beijing, China, *Atmospheric Environment*, 195, 30-45, <https://doi.org/10.1016/j.atmosenv.2018.09.043>, 2018.
- Zhang, H., Cheng, S., Yao, S., Wang, X., and Wang, C.: Insights into the temporal and spatial characteristics of PM<sub>2.5</sub> transport flux across the district, city and region in the North China Plain, *Atmospheric Environment*, 218, <https://doi.org/10.1016/j.atmosenv.2019.117010>, 2019a.

- Zhang, H., Cheng, S., Yao, S., Wang, X., and Zhang, J.: Multiple perspectives for modeling regional PM<sub>2.5</sub> transport across cities in the Beijing–Tianjin–Hebei region during haze episodes, *Atmospheric Environment*, 212, 22-35, <https://doi.org/10.1016/j.atmosenv.2019.05.031>, 2019b.
- Zhang, J., An, J., Qu, Y., Liu, X., and Chen, Y.: Impacts of potential HONO sources on the concentrations of oxidants and secondary organic aerosols in the Beijing-Tianjin-Hebei region of China, *Science of the Total Environment*, 647, 836-852, <https://doi.org/10.1016/j.scitotenv.2018.08.030>, 2019.
- Zhang, L., Jin, L., Zhao, T., Yin, Y., Zhu, B., Shan, Y., Guo, X., Tan, C., Gao, J., and Wang, H.: Diurnal variation of surface ozone in mountainous areas: Case study of Mt. Huang, East China, *Science of the Total Environment*, 538, 583-590, <https://doi.org/10.1016/j.scitotenv.2015.08.096>, 2015a.
- Zhang, L., Wang, T., Lv, M., and Zhang, Q.: On the severe haze in Beijing during January 2013: Unraveling the effects of meteorological anomalies with WRF-Chem, *Atmospheric Environment*, 104, 11-21, <https://doi.org/10.1016/j.atmosenv.2015.01.001>, 2015b.
- Zhang, L., Shao, J., Lu, X., Zhao, Y., Hu, Y., Henze, D. K., Liao, H., Gong, S., and Zhang, Q.: Sources and Processes Affecting Fine Particulate Matter Pollution over North China: An Adjoint Analysis of the Beijing APEC Period, *Environmental Science & Technology*, 50, 8731-8740, <https://doi.org/10.1021/acs.est.6b03010>, 2016a.
- Zhang, L., Li, Q., Wang, T., Ahmadov, R., Zhang, Q., Li, M., and Lv, M.: Combined impacts of nitrous acid and nitryl chloride on lower-tropospheric ozone: new module development in WRF-Chem and application to China, *Atmospheric Chemistry and Physics*, 17, 9733-9750, <https://doi.org/10.5194/acp-17-9733-2017>, 2017a.
- Zhang, L., Zhu, B., Gao, J., and Kang, H.: Impact of Taihu Lake on city ozone in the Yangtze River Delta, *Advances in Atmospheric Sciences*, 34, 226-234, <https://doi.org/10.1007/s00376-016-6099-6>, 2017b.
- Zhang, L., Zhao, T., Gong, S., Kong, S., Tang, L., Liu, D., Wang, Y., Jin, L., Shan, Y., Tan, C., Zhang, Y., and Guo, X.: Updated emission inventories of power plants in simulating air quality during haze periods over East China, *Atmospheric Chemistry and Physics*, 18, 2065-2079, <https://doi.org/10.5194/acp-18-2065-2018>, 2018.
- Zhang, L., Guo, X., Zhao, T., Gong, S., Xu, X., Li, Y., Luo, L., Gui, K., Wang, H., Zheng, Y., and Yin, X.: A modelling study of the terrain effects on haze pollution in the Sichuan Basin, *Atmospheric Environment*, 196, 77-85, <https://doi.org/10.1016/j.atmosenv.2018.10.007>, 2019.
- Zhang, Q., Pan, Y., He, Y., Zhao, Y., Zhu, L., Zhang, X., Xu, X., Ji, D., Gao, J., Tian, S., Gao, W., and Wang, Y.: Bias in ammonia emission inventory and implications on emission control of nitrogen oxides over North China Plain, *Atmospheric Environment*, 214, <https://doi.org/10.1016/j.atmosenv.2019.116869>, 2019a.

- Zhang, Q., Xue, D., Liu, X., Gong, X., and Gao, H.: Process analysis of PM<sub>2.5</sub> pollution events in a coastal city of China using CMAQ, *Journal of Environmental Sciences*, 79, 225-238, <https://doi.org/10.1016/j.jes.2018.09.007>, 2019b.
- Zhang, R., Sarwar, G., Fung, J. C. H., and Lau, A. K. H.: Role of photoexcited nitrogen dioxide chemistry on ozone formation and emission control strategy over the Pearl River Delta, China, *Atmospheric Research*, 132-133, 332-344, <https://doi.org/10.1016/j.atmosres.2013.06.001>, 2013.
- Zhang, S., Xing, J., Sarwar, G., Ge, Y., He, H., Duan, F., Zhao, Y., He, K., Zhu, L., and Chu, B.: Parameterization of heterogeneous reaction of SO<sub>2</sub> to sulfate on dust with coexistence of NH<sub>3</sub> and NO<sub>2</sub> under different humidity conditions, *Atmospheric Environment*, 208, 133-140, <https://doi.org/10.1016/j.atmosenv.2019.04.004>, 2019.
- Zhang, X., Zhang, Q., Hong, C., Zheng, Y., Geng, G., Tong, D., Zhang, Y., and Zhang, X.: Enhancement of PM<sub>2.5</sub> Concentrations by Aerosol-Meteorology Interactions Over China, *Journal of Geophysical Research: Atmospheres*, 123, 1179-1194, <https://doi.org/10.1002/2017jd027524>, 2018.
- Zhang, Y., Zhang, X., Wang, L., Zhang, Q., Duan, F., and He, K.: Application of WRF/Chem over East Asia: Part I. Model evaluation and intercomparison with MM5/CMAQ, *Atmospheric Environment*, 124, 285-300, <https://doi.org/10.1016/j.atmosenv.2015.07.022>, 2016.
- Zhang, Y., Liao, H., Ding, X., Jo, D., and Li, K.: Implications of RCP emissions on future concentration and direct radiative forcing of secondary organic aerosol over China, *Science of the Total Environment*, 640-641, 1187-1204, <https://doi.org/10.1016/j.scitotenv.2018.05.274>, 2018.
- Zhang, Z., Gong, D., Mao, R., Kim, S. J., Xu, J., Zhao, X., and Ma, Z.: Cause and predictability for the severe haze pollution in downtown Beijing in November-December 2015, *Science of the Total Environment*, 592, 627-638, <https://doi.org/10.1016/j.scitotenv.2017.03.009>, 2017a.
- Zhang, Z., Wang, W., Cheng, M., Liu, S., Xu, J., He, Y., and Meng, F.: The contribution of residential coal combustion to PM<sub>2.5</sub> pollution over China's Beijing-Tianjin-Hebei region in winter, *Atmospheric Environment*, 159, 147-161, <https://doi.org/10.1016/j.atmosenv.2017.03.054>, 2017b.
- Zhao, B., Wang, S., Wang, J., Fu, J. S., Liu, T., Xu, J., Fu, X., and Hao, J.: Impact of national NO<sub>x</sub> and SO<sub>2</sub> control policies on particulate matter pollution in China, *Atmospheric Environment*, 77, 453-463, <https://doi.org/10.1016/j.atmosenv.2013.05.012>, 2013.
- Zhao, S., Tie, X., Cao, J., and Zhang, Q.: Impacts of mountains on black carbon aerosol under different synoptic meteorology conditions in the Guanzhong region, China, *Atmospheric Research*, 164-165, 286-296, <https://doi.org/10.1016/j.atmosres.2015.05.016>, 2015.
- Zhao, X., Zhao, Y., Chen, D., Li, C., and Zhang, J.: Top-down estimate of black carbon emissions for city clusters using ground observations: a case study in southern Jiangsu, China, *Atmospheric Chemistry and Physics*, 19, 2095-2113, <https://doi.org/10.5194/acp-19-2095-2019>, 2019.
- Zhao, Y., Mao, P., Zhou, Y., Yang, Y., Zhang, J., Wang, S., Dong, Y., Xie, F., Yu, Y., and Li, W.: Improved provincial emission inventory and speciation profiles of anthropogenic non-methane

- volatile organic compounds: a case study for Jiangsu, China, *Atmospheric Chemistry and Physics*, 17, 7733-7756, <https://doi.org/10.5194/acp-17-7733-2017>, 2017a.
- Zhao, Y., Zhang, L., Chen, Y., Liu, X., Xu, W., Pan, Y., and Duan, L.: Atmospheric nitrogen deposition to China: A model analysis on nitrogen budget and critical load exceedance, *Atmospheric Environment*, 153, 32-40, <https://doi.org/10.1016/j.atmosenv.2017.01.018>, 2017b.
- Zheng, H., Cai, S., Wang, S., Zhao, B., Chang, X., and Hao, J.: Development of a unit-based industrial emission inventory in the Beijing–Tianjin–Hebei region and resulting improvement in air quality modeling, *Atmospheric Chemistry and Physics*, 19, 3447-3462, <https://doi.org/10.5194/acp-19-3447-2019>, 2019.
- Zhou, G., Xu, J., Xie, Y., Chang, L., Gao, W., Gu, Y., and Zhou, J.: Numerical air quality forecasting over eastern China: An operational application of WRF-Chem, *Atmospheric Environment*, 153, 94-108, <https://doi.org/10.1016/j.atmosenv.2017.01.020>, 2017.
- Zhou, Y., Zhao, Y., Mao, P., Zhang, Q., Zhang, J., Qiu, L., and Yang, Y.: Development of a high-resolution emission inventory and its evaluation and application through air quality modeling for Jiangsu Province, China, *Atmospheric Chemistry and Physics*, 17, 211-233, <https://doi.org/10.5194/acp-17-211-2017>, 2017.
- Zhu, J., and Liao, H.: Future ozone air quality and radiative forcing over China owing to future changes in emissions under the Representative Concentration Pathways (RCPs), *Journal of Geophysical Research: Atmospheres*, 121, 1978-2001, <https://doi.org/10.1002/2015jd023926>, 2016.
- Zhu, K., Xie, M., Wang, T., Cai, J., Li, S., and Feng, W.: A modeling study on the effect of urban land surface forcing to regional meteorology and air quality over South China, *Atmospheric Environment*, 152, 389-404, <https://doi.org/10.1016/j.atmosenv.2016.12.053>, 2017.
- Zhu, L., Henze, D., Bash, J., Jeong, G. R., Cady-Pereira, K., Shephard, M., Luo, M., Paulot, F., and Capps, S.: Global evaluation of ammonia bidirectional exchange and livestock diurnal variation schemes, *Atmospheric Chemistry and Physics*, 15, 12823-12843, <https://doi.org/10.5194/acp-15-12823-2015>, 2015.
